# Supplementary material for: Shikonin Binds and Represses PPARγ Activity by Releasing Coactivators and Modulating Histone Methylation Codes
Source: MDPI journal article supplement (doi:10.3390/nu15071797), 2023-04-06
Supplement: s1 [file s1]

# Shikonin binds and represses PPAR $\gamma$ activity by releasing coactivator and modulating histone methylation codes

Ui-Hyun Park <sup>1</sup>, Jin-Taek Hwang<sup>2</sup>, HyeSook Youn<sup>1</sup>, Eun-Joo Kim<sup>3</sup>, and Soo-Jong Um<sup>1,\*</sup>

<sup>1</sup> Department of Integrative Bioscience and Biotechnology, Sejong University, 209 Neungdong-ro, Gwangjin-gu, Seoul 05006, Republic of Korea

<sup>2</sup> Department of Molecular Biology, Dankook University, Cheonan-si 31116, Republic of Korea

\*Correspondence to Soo-Jong Um:

E-mail: [umsj@sejong.ac.kr](mailto:umsj@sejong.ac.kr); Tel.: +82-2-3408-3641; Fax: +82-2-3408-4334

Supplementary Table S1. Primer sequences used for qPCR.

| Gene       | Forward (5'-3')             | Reverse (5'-3')                  |
|------------|-----------------------------|----------------------------------|
| ChIP-qPCR: |                             |                                  |
| Adipoq     | CCTGTTTCCAGGCTTTGGCC        | GGTGCTGGGAATTGAACTCA             |
| Fabp4      | ATGCCCTGACCATGTGA           | AAATTCAGAAGAAAGTAAACACAT<br>TATT |
| Lpl        | CCACTGCACAGCTGTTTAAGTGACTGG | CCTCCCGGTAGGCAAACCTGG            |
| Retn       | GCTACAAGGCTACCCTCAGC        | GGGGAGGTTTGGAGGTGATG             |
| Hsd11b1    | GGAACAATGGGCCCCAAAAC        | CTGGCCTCCTTTTCTCAGCA             |
| Acsl1      | CGGTGGGGTGACTCTACTCT        | TCACATGCCGAGTCCTACAC             |
| RT-qPCR:   |                             |                                  |
| Adipoq     | TGACGACACCAAAGGGGCTC        | CACAAGTTCCTTGGGTGGA              |
| Fabp4      | AAAGACAGCTCCTCCTCGAAGGTT    | TGACCAAATCCCCATTTACGC            |
| Lpl        | ATCCATGGATGGACGGTAACG       | CTGGATCCCAATACTTCGACCA           |
| Retn       | CAGAAGGCACAGCAGTCTTG        | ACGCTCACTTCCCCGACAT              |
| Acsl1      | GCCGCGACTCCTTAAATAGC        | GTTCTCTATGCAGAATTCTCCT<br>CC     |
| Hsd11b1    | CCTGCCTGGGAGGTTGTAGA        | TCCCTGGAGCATTTCTGGTC             |
| CD36       | GTCCTGGCTGTGTTTGGAGG        | CTTGGCTAGATAACGAACTCTGTA         |
| Glut4      | AGGGGCCTGCCCCGAAAGAGT       | CTGTTGGCTCAGCTGCAGCA             |
| Leptin     | CCTCACCAGCCTGCCTTCCCA       | TCCAGGACGCCATCCAGGCT             |
| Lxra       | GCTGCCCAGCAACAGTGTA         | CTGCCGGGGTTGTACCTCCGT            |
| Lxrb       | GGCTTCTTCCGGCGCAGTGT        | CCTTCCCCGGAGCCCTGGCT             |

Supplementary Table S2. PPAR $\gamma$  related terms found in GO analysis using 1473 down-regulated genes.

| ln(P)  | Term                                                                                | GO Tree       |
|--------|-------------------------------------------------------------------------------------|---------------|
| -56.15 | WANG_CLASSIC_ADIPOGENIC_TARGETS_OF_PPARG                                            | MSigDB lists  |
| -53.82 | WAKABAYASHI_ADIPOGENESIS_PPARG_RXRA_BOUND_8D                                        | MSigDB lists  |
| -43.29 | WAKABAYASHI_ADIPOGENESIS_PPARG_RXRA_BOUND_WITH_H4K20ME1_MARK                        | MSigDB lists  |
| -32.26 | LI_ADIPOGENESIS_BY_ACTIVATED_PPARG                                                  | MSigDB lists  |
| -24.09 | PPAR signaling pathway                                                              | KEGG pathways |
| -24.08 | KEGG_PPARG_SIGNALING_PATHWAY                                                        | MSigDB lists  |
| -20.1  | PPAR signaling pathway                                                              | WikiPathways  |
| -17.97 | WAKABAYASHI_ADIPOGENESIS_PPARG_RXRA_BOUND_36HR                                      | MSigDB lists  |
| -16.09 | GSE37533_PPARG1_FOXP3_VS_FOXP3_TRANSDUCE_CD4_TCELL_DN                               | MSigDB lists  |
| -15.86 | GSE37533_PPARG2_FOXP3_VS_FOXP3_TRANSDUCE_CD4_TCELL_DN                               | MSigDB lists  |
| -13.93 | WAKABAYASHI_ADIPOGENESIS_PPARG_BOUND_8D                                             | MSigDB lists  |
| -12.67 | GSE37534_UNTREATED_VS_PIOGLITAZONE_TREATED_CD4_TCELL_PPARG1_AND_FOXP3_TRANSDUCE_DN  | MSigDB lists  |
| -12.54 | GSE37533_PPARG1_FOXP3_VS_PPARG2_FOXP3_TRANSDUCE_CD4_TCELL_PIOGLITAZONE_TREATED_DN   | MSigDB lists  |
| -8.72  | V\$PPAR_DR1_Q2                                                                      | MSigDB lists  |
| -8.43  | GSE37533_PPARG1_FOXP3_VS_FOXP3_TRANSDUCE_CD4_TCELL_PIOGLITAZONE_TREATED_UP          | MSigDB lists  |
| -7.51  | GSE5679_CTRL_VS_PPARG_LIGAND_ROSIGLITAZONE_AND_RARA_AгонIST_AM580_TREATED_DC_UP     | MSigDB lists  |
| -5.00  | GSE37533_UNTREATED_VS_PIOGLITAZONE_TREATED_CD4_TCELL_PPARG1_AND_FOXP3_TRANSDUCE_UP  | MSigDB lists  |
| -4.93  | GSE25123_WT_VS_PPARG_KO_MACROPHAGE_IL4_AND_ROSIGLITAZONE_STIM_UP                    | MSigDB lists  |
| -4.64  | GSE25123_CTRL_VS_ROSIGLITAZONE_STIM_PPARG_KO_MACROPHAGE_UP                          | MSigDB lists  |
| -4.63  | GSE37534_UNTREATED_VS_ROSIGLITAZONE_TREATED_CD4_TCELL_PPARG1_AND_FOXP3_TRANSDUCE_DN | MSigDB lists  |

|       |                                                                                     |                      |
|-------|-------------------------------------------------------------------------------------|----------------------|
| -4.06 | Ppargc1b (peroxisome proliferative activated receptor, gamma, coactivator 1 beta)   | protein interactions |
| -4.03 | GSE25123_WT_VS_PPARG_KO_MACROPHAGE_ROSIGLITAZONE_STIM_DN                            | MSigDB lists         |
| -3.91 | GSE37532_TREG_VS_TCONV_PPARG_KO_CD4_TCELL_FROM_VISCERAL_ADIPOSE_TISSUE_UP           | MSigDB lists         |
| -3.89 | GSE25123_CTRL_VS_IL4_AND_ROSIGLITAZONE_STIM_PPARG_KO_MACROPHAGE_UP                  | MSigDB lists         |
| -3.81 | GSE37533_UNTREATED_VS_PIOGLIZATONE_TREATED_CD4_TCELL_PPARG2_AND_FOXP3_TRANSDUCED_UP | MSigDB lists         |
| -3.77 | GSE5679_PPARG_LIGAND_ROSIGLITAZONE_VS_RARA_AGNIST_AM580_TREATED_DC_UP               | MSigDB lists         |
| -3.53 | GSE25123_CTRL_VS_IL4_STIM_PPARG_KO_MACROPHAGE_UP                                    | MSigDB lists         |
| -3.45 | GSE25123_CTRL_VS_IL4_AND_ROSIGLITAZONE_STIM_PPARG_KO_MACROPHAGE_DN                  | MSigDB lists         |
| -3.36 | GSE5679_CTRL_VS_PPARG_LIGAND_ROSIGLITAZONE_TREATED_DC_UP                            | MSigDB lists         |
| -3.26 | Ppargc1a (peroxisome proliferative activated receptor, gamma, coactivator 1 alpha)  | protein interactions |
| -3.00 | GSE24292_WT_VS_PPARG_KO_MACROPHAGE_UP                                               | MSigDB lists         |

---

**A**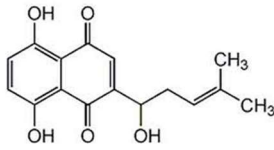**C**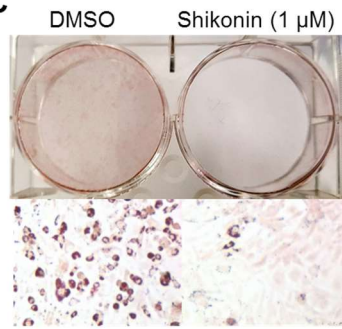**D**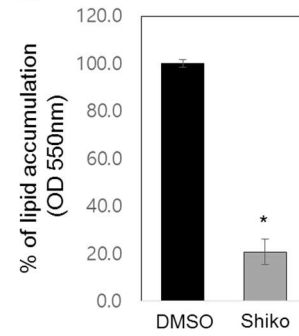**B**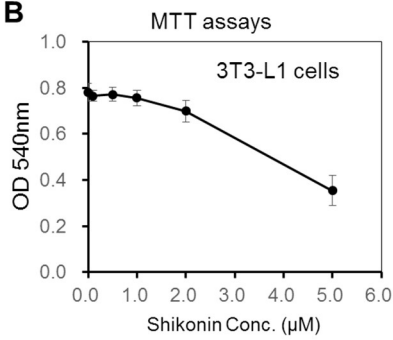**E**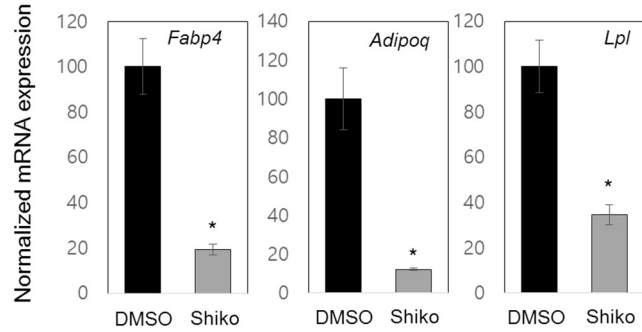**F**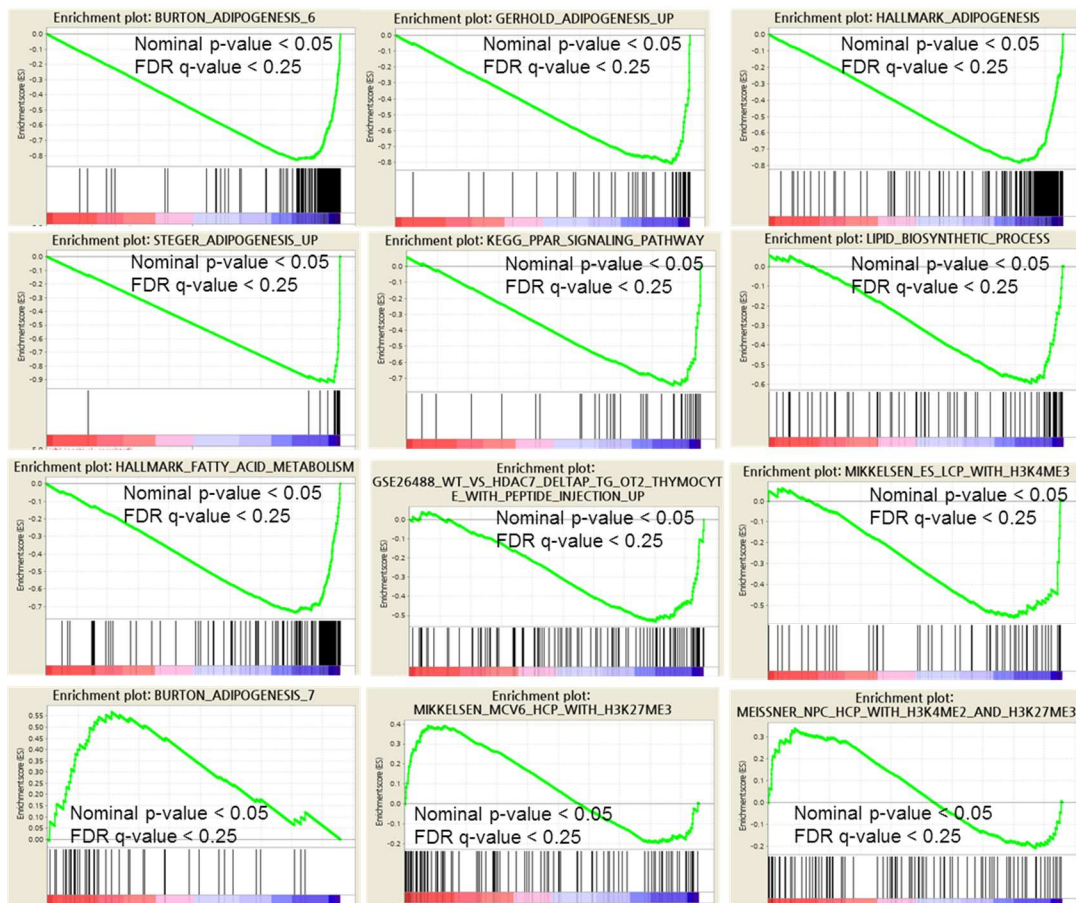

Shikonin (positively related)

DMSO (negatively related)

**Supplementary Figure S1.** Anti-adipogenic effects of shikonin in 3T3-L1 cells. **(A)** Structure of shikonin. **(B)** Cytotoxicity of shikonin, measured by MTT assays. 3T3-L1 cells were grown in growth media as described in materials and method and plated at 500 cells/well in a 96-well tissue culture plate. Indicated concentrations of shikonin were treated and incubated for 72 h. 50  $\mu$ L of MTT reagent (2 mg/mL) was added and incubated for 4 h. The MTT was dissolved with 0.1 mL of DMSO, and absorbance was read at 540 nm. **(C, D)** 3T3-L1 cells were differentiated and treated with DMSO or shikonin (1  $\mu$ M). After differentiation for 8 days, lipid droplets in cells were fixed and stained with Oil Red O **(C)** and quantified at an OD of 500 nm **(D)**. **(E)** Effects of shikonin on the mRNA expression of adipogenic genes (*Fabp4*, *Adipoq*, and *Lpl*). mRNA expression, measured by RT-qPCR, was normalized to GAPDH expression and presented as a relative value to the DMSO control. Data are shown as means  $\pm$  SDs for three independent experiments (\* $p < 0.05$ ). **(F)** Gene set enrichment analysis (GSEA) of genes with altered expression after shikonin treatment. A nominal p-value  $< 0.05$  and false discovery rate (FDR) q-value  $< 0.25$  were considered to indicate statistical significance.

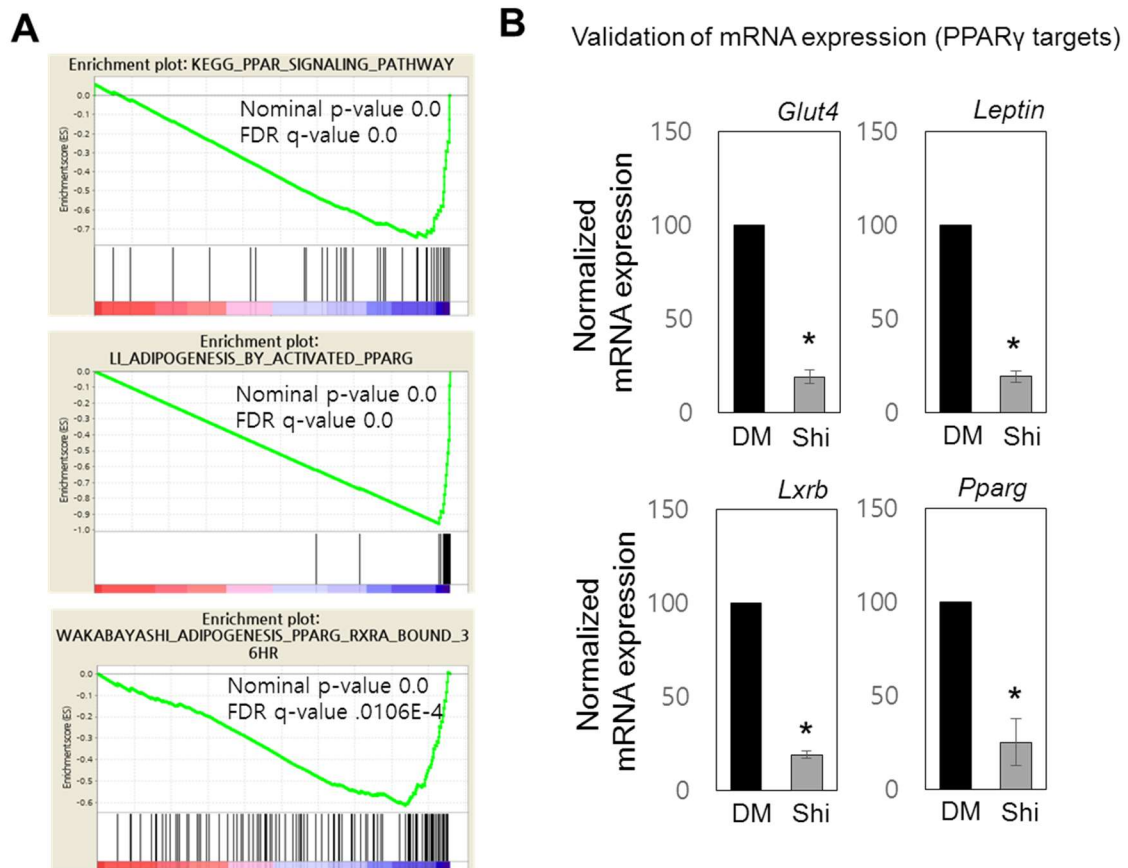

**Supplementary Figure S2.** Validation of RNA-seq data. **(A)** GSEA of KEGG\_PPAR\_SIGNALING\_PATHWAY, LI\_ADIPOGENESIS\_BY\_ACTIVATED\_PPARG, and WAKABAYASHI\_ADIPOGENESIS\_PPARG\_RXRA\_BOUND\_36HR. **(B)** Effects of shikonin on the mRNA expression of the PPAR $\gamma$  target genes *Glut4*, *Leptin*, *Lxrb*, and *Pparg*. 3T3-L1 cells were differentiated and treated with DMSO or shikonin. mRNA expression was measured by RT-qPCR and normalized to GAPDH expression. The mRNA expression level is presented relative to that of the DMSO control. Data are shown as means  $\pm$  SDs for three independent experiments (\* $p < 0.05$ ).

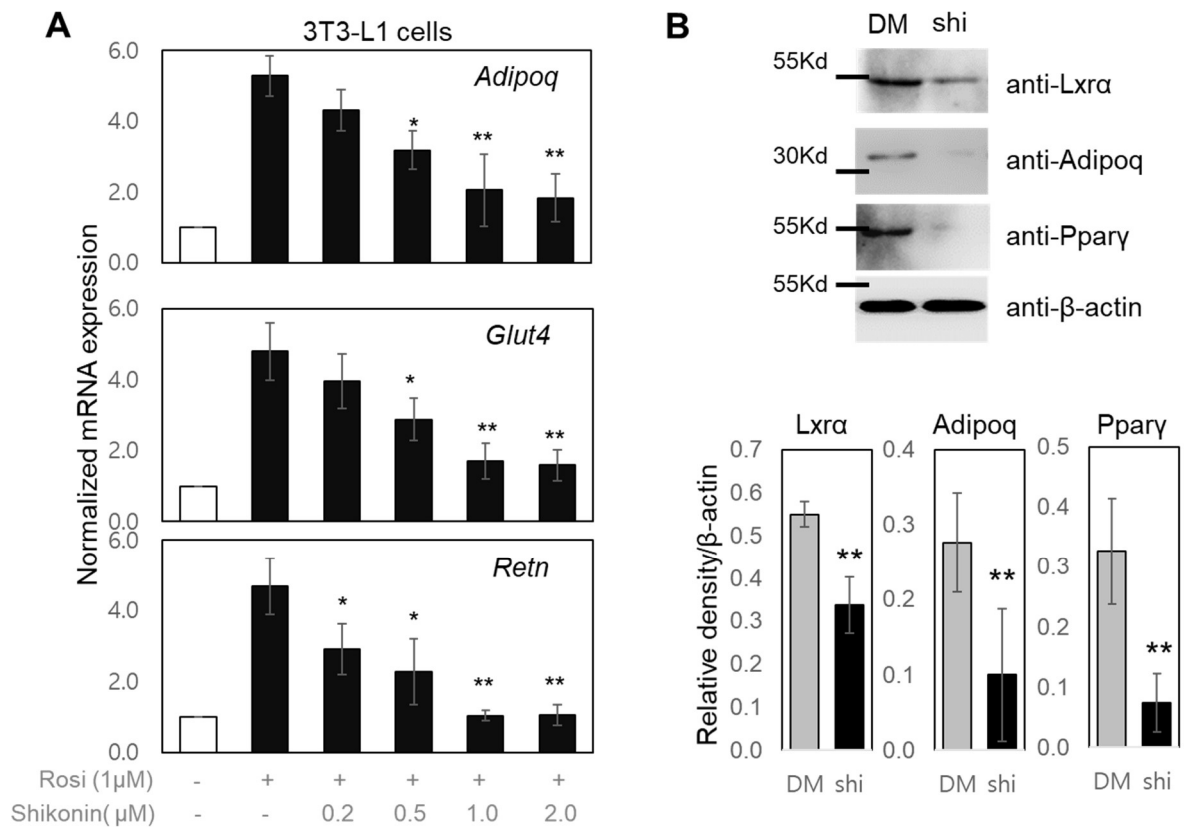

**Supplementary Figure S3.** Effect of shikonin on rosiglitazone-induced activation of the PPAR $\gamma$  target genes. **(A)** The mRNA expression of PPAR $\gamma$  target genes *Adipoq*, *Glut4*, and *Retn* was determined as described in Figure 2C. **(B)** Effect of shikonin on the protein expression of Lxra, Adipoq, and PPAR $\gamma$  in 3T3-L1 cells. 3T3-L1 cells were differentiated upon DMSO or shikonin for 6 days. Lysates were separated by SDS-PAGE on 10 % gels, transferred to PVDFs membrane, and blotted with antibodies using indicated antibodies. Density were measured by ImageJ and normalized with density of anti- $\beta$ -actin. Bars represent means  $\pm$  SDs (\* $p < 0.05$  and \*\* $p < 0.01$ ).



**A**

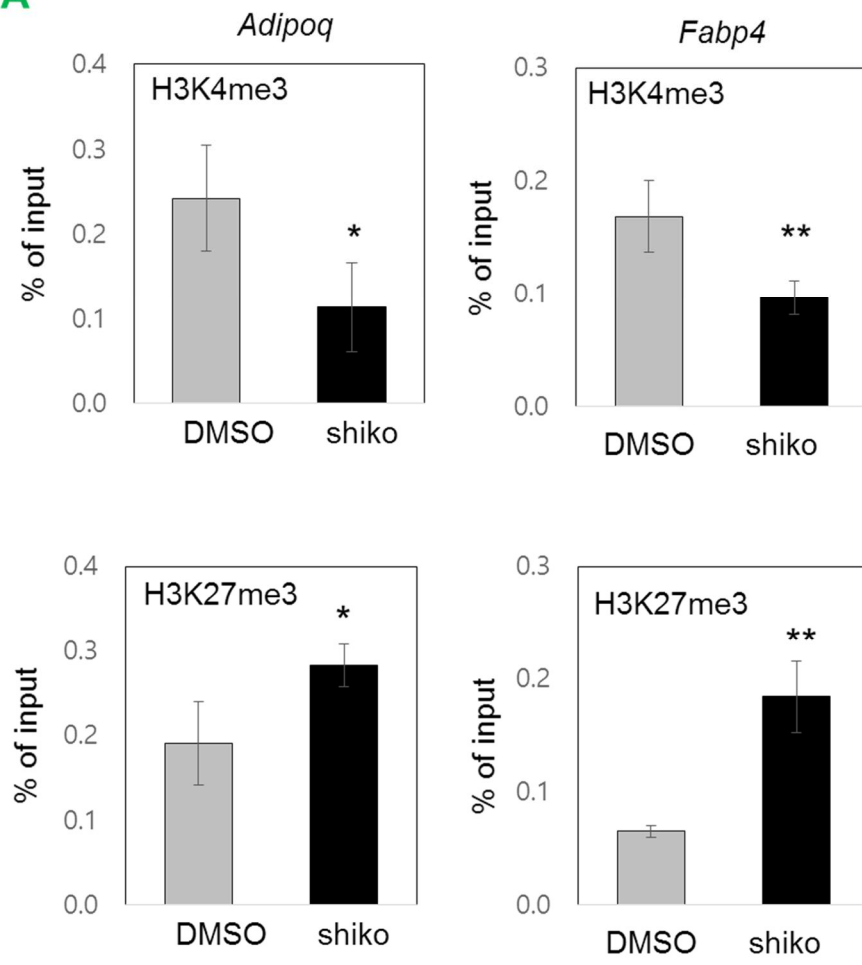

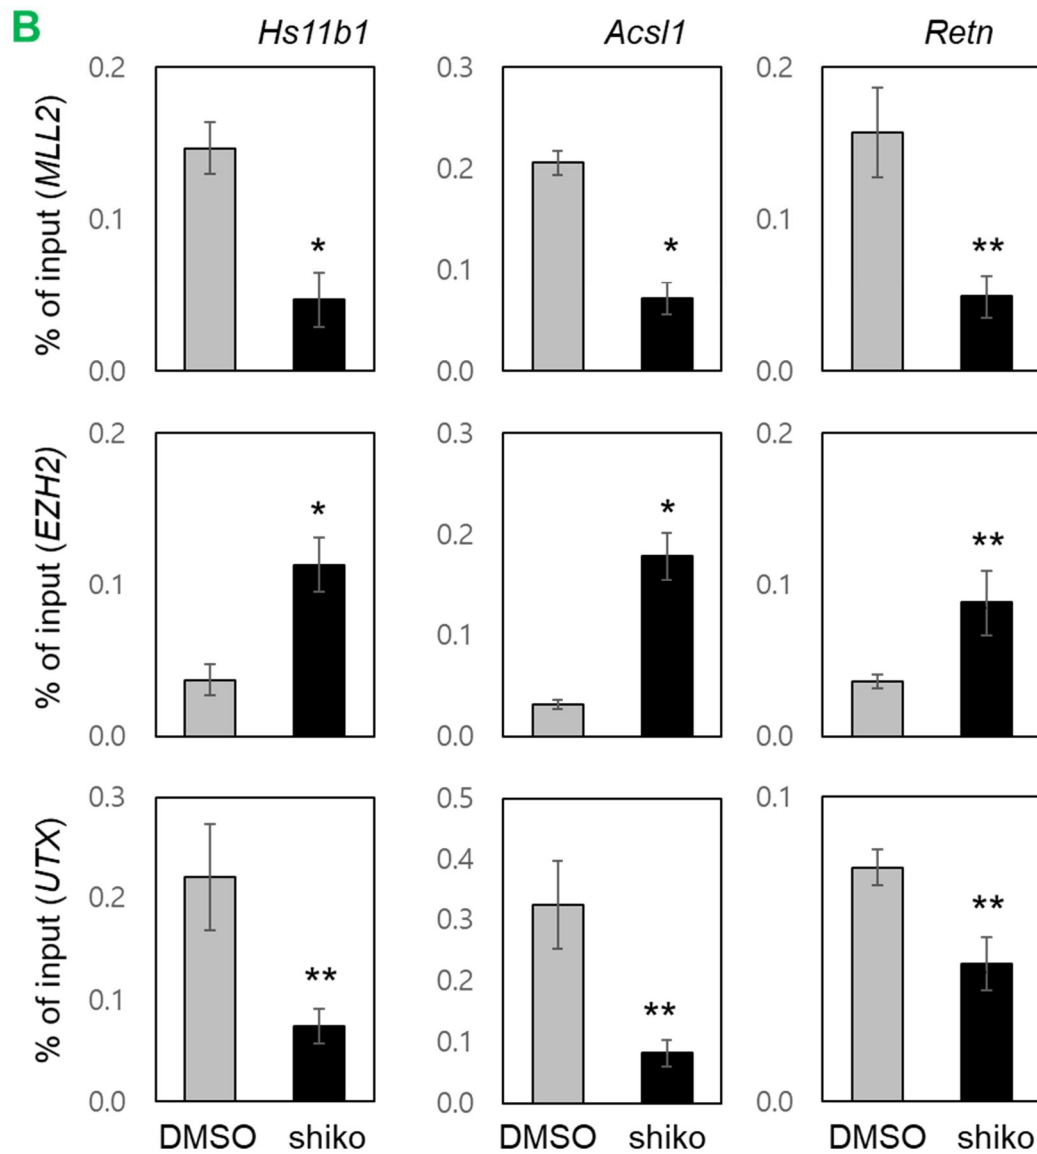

**Supplementary Figure S4.** Epigenetic regulation of PPAR $\gamma$  target genes by shikonin. ChIP assays were performed as described in Figure 4. **(A)** Two other PPAR $\gamma$  target genes, *Adipoq* and *Fabp4*, were used for assays. **(B)** ChIP assays using the indicated antibodies against MLL2, EZH2, and UTX. Binding occupancy was determined using qPCR and primer sets for the targeted promoters. Data are shown as means  $\pm$  SDs for three independent experiments (\* $p < 0.05$  and \*\* $p < 0.01$ ).
