# Supplementary material for: Shikonin Binds and Represses PPARγ Activity by Releasing Coactivators and Modulating Histone Methylation Codes
Source: Nutrients. 2023 Apr 6;15(7):1797. doi: 10.3390/nu15071797 (PMC10097191; doi:10.3390/nu15071797)
Supplement: Supplementary file 1 [file nutrients-15-01797-s001.zip › Supplementary Tables S3-S6.xlsx]

## Sheet: Table S3
Table S3. Genes changed 1.5-fold in shikonin treated 3T3-L1 cells.
ID	Gene symbol	Fold change (Shikonin/DMSO)	Entrez ID	transcript_id	Aliases	Description
14068	Mup15	271.119	100039150	NM_001200004_1	100039150| Gm2068| Mup13	major urinary protein 15
14073	Mup1	222.134	17840	NM_001163011	Ltn-1| Lvtn-1| Mup-1| Mup-a| Mup10| Mup7| Up-1	major urinary protein 1
14077	Mup12	199.684	100039054	NM_001199995	100039054| Gm2024	major urinary protein 12
14075	Mup11	103.793	100039028	NM_001164526	Gm12549| OTTMUSG00000007431	major urinary protein 11
14069	Mup7	100.734	100041658	NM_001134675	Gm12546| Mup3| OTTMUSG00000007428	major urinary protein 7
14076	Gm2083	91.8555		NM_001134644_2
14070	Mup2	81.9719	17841	NM_008647	AA589603| Mup-2| Mup18| Mup4	major urinary protein 2
15669	Alb	79.0636	11657	NM_009654	Alb-1| Alb1| BCL002	albumin
14079	Mup14	65.4072	100039116	NM_001199999	Gm13514| Mup12| OTTMUSG00000012493	major urinary protein 14
14074	Mup10	62.3517	100039008	NM_001122647	2610016E04Rik| Mup8	major urinary protein 10
22959	Vmn2r121	62.0023	100038941	NM_001100616	EG625699	vomeronasal 2, receptor 121
14082	LOC100048884	61.8701		NM_001199333
14071	Mup8	59.256	100041687	NM_001134676	Gm12809| Mup5| OTTMUSG00000008509	major urinary protein 8
14072	Mup9	52.87	100038948	NM_001281979	Gm14076| Mup2| Mup6| OTTMUSG00000015595	major urinary protein 9
14083	Mup19	37.7167	100189605	NM_001135127	100039247| Gm12552| Mup11| Mup14| Mup17| Mup6| Mup8| OTTMUSG00000007472	major urinary protein 19
14078	Mup13	34.6043	100039089	NM_001134674	Gm13513| Mup11| OTTMUSG00000012492	major urinary protein 13
4165	Apob	31.0322	238055	NM_009693	AI315052| Apo B-100| apob-100| apob-48	apolipoprotein B
17357	Mug1	30.4413	17836	NM_008645		murinoglobulin 1
18245	Cyp2a5	29.4269	13087	NM_007812	Coh| Cyp15a2| CYPIIA5	cytochrome P450, family 2, subfamily a, polypeptide 5
14080	Mup16	25.6008	100039177	NM_001199936	100039177| Mup6	major urinary protein 16
16383	Cyp3a11	25.3971	13112	NM_007818	AI256190| Cyp3a| IIIAm1| Pcn	cytochrome P450, family 3, subfamily a, polypeptide 11
5752	Gm10732	21.3777	100038690	NR_131153	ENSMUSG00000074638	predicted gene 10732
2137	Glipr1l2	21.3047	67537	NM_026223	4921508O11Rik	GLI pathogenesis-related 1 like 2
21430	Apoa1	20.2784	11806	NM_009692	Alp-1| apo-AI| Apoa-1| apoA-I| Brp-14| Ltw-1| Lvtw-1| Sep-1| Sep-2| Sep2	apolipoprotein A-I
12946	Fgb	19.2625	110135	NM_181849	2510049G14Rik	fibrinogen beta chain
14081	Mup17	19.2625	100039206	NM_001200006	100039206| Gm12557| MUP 17| OTTMUSG00000007480	major urinary protein 17
17358	Mug2	16.2304	17837	NM_008646	Cpamd8	murinoglobulin 2
8257	Plg	16.2154	18815	NM_008877	AI649309| Pg	plasminogen
2656	Cyfip2	15.5426	76884	NM_133769	1500004I01Rik| 6430511D02Rik| AA930218| AU022376| mKIAA1168| Pir121	cytoplasmic FMR1 interacting protein 2
21231	Vsig2	10.8804	57276	NM_020518	1190004B15Rik| 2210413P10Rik| AU040484| Ctm| CTX	V-set and immunoglobulin domain containing 2
7764	Bdh1	10.5532	71911	NM_175177	2310032J20Rik| AI327223| Bdh	3-hydroxybutyrate dehydrogenase, type 1
21019	Fat3	10.4652	270120	NM_001080814	9430076A06Rik| D430038H04Rik| Gm1132| Gm510| MFAT3F	FAT atypical cadherin 3
21936	Trf	9.34869	22041	NM_133977	AI266983| Cd176| HP| hpx| Tf| Tfn	transferrin
22131	4930525D18Rik	8.98902	75100	NR_040738		RIKEN cDNA 4930525D18 gene
20899	Gm26391	8.85821	100861488	NR_046140_8	Rn5s17	predicted gene, 26391
2097	Gm4340	8.81422	100043292	NM_001177535	100043292	predicted gene 4340
20897	Gm22291	8.42699	100861501	NR_046154_9	Rn5s30	predicted gene, 22291
20896	Gm23284	8.33142	100861502	NR_046155_3	Rn5s31	predicted gene, 23284
11187	Scn3a	8.32665	20269	NM_018732	Gm1000| Nav1.3	sodium channel, voltage-gated, type III, alpha
14650	Snord85	8.32499	100217460	NR_028565	MBII-251| Z50	small nucleolar RNA, C/D box 85
20898	Gm22109	8.27205	100861494	NR_046147_6	Rn5s23	predicted gene, 22109
9691	Sncaip	8.26498	67847	NM_001199151	2810407O15Rik| 4933427B05Rik| BB104594| SYPH1	synuclein, alpha interacting protein (synphilin)
20895	Gm25212	7.93365	100861499	NR_046152_9	Rn5s28	predicted gene, 25212
20900	Gm25018	7.93365	100861480	NR_046127_2	Rn5s10	predicted gene, 25018
1400	Raet1c	7.48572		NM_009018
6042	BC061237	7.41632	385138	NM_198677		cDNA sequence BC061237
12029	Chgb	7.29025	12653	NM_007694	Scg-1	chromogranin B
17724	Oscar	6.92715	232790	NM_001290377	mOSCAR| mOSCAR-M1| mOSCAR-M2| mOSCAR-M3	osteoclast associated receptor
8264	Mas1	6.75682	17171	NM_008552	Mas-1| Mgra	MAS1 oncogene
4709	Serpina1c	6.48086	20702	NM_009245	Pi3| Pi6| Skalp| Spi1-3| Spi1-6| Wap3	serine (or cysteine) peptidase inhibitor, clade A, member 1C
4707	Serpina1d	6.21893	20703	NM_009246	AI118301| Dom4| PI4| Spi1-4	serine (or cysteine) peptidase inhibitor, clade A, member 1D
4710	Serpina1e	6.21462	20704	NM_009247	Dom5| PI5| Spi1-5	serine (or cysteine) peptidase inhibitor, clade A, member 1E
15806	Ephx4	5.70886	384214	NM_001001804	Abhd7| Ephxrp| Gm1382	epoxide hydrolase 4
20988	Phxr4	5.56681	18689	NR_028271	Sp5	per-hexamer repeat gene 4
17480	Pzp	5.19126	11287	NM_007376	A1m| A2m| AI893533| MAM	pregnancy zone protein
5265	Fgd3	5.18529	30938	NM_015759	5830461L01Rik| ZFYVE5	FYVE, RhoGEF and PH domain containing 3
18621	Mtag2	5.17625	50994	NR_015480	MAG	metastasis associated gene 2
11737	Olfr1314	4.92501	258442	NM_146450	MOR245-2	olfactory receptor 1314
5988	Antxrl	4.9135	239029	NM_172808	1700112N15Rik| 4933430J11	anthrax toxin receptor-like
20549	Ces1c	4.90557	13884	NM_007954	Ces-N| Ee-1| Ee1| Es-4| Es-N| Es1| Es4| EsN| PESN	carboxylesterase 1C
5784	4930555G01Rik	4.86866	108978	NM_175393		RIKEN cDNA 4930555G01 gene
4706	Serpina1b	4.86763	20701	NM_009244	D12Ucla2| Dom2| PI2| Spi1-2	serine (or cysteine) preptidase inhibitor, clade A, member 1B
6384	Stmn4	4.76869	56471	NM_019675	Lagl| R75359| RB3	stathmin-like 4
14005	Grin3a	4.74763	242443	NM_001033351	6430537F04| A830097C19Rik| mKIAA1973| NMDAR-L| NR3A	glutamate receptor ionotropic, NMDA3A
1968	4930463O16Rik	4.74199	75804	NR_108059		RIKEN cDNA 4930463O16 gene
11932	Adra2b	4.73661	11552	NM_009633	Adra-2b| alpha2-C2| alpha2B| [a]2B	adrenergic receptor, alpha 2b
14936	1700095A21Rik	4.69642	67524	NR_045468		RIKEN cDNA 1700095A21 gene
3371	Heatr9	4.65814	629303	NM_001045543	Gm11435| OTTMUSG00000000990	HEAT repeat containing 9
13205	Bnipl	4.65814	171388	NM_134253	1700128A13Rik| BNIP-S| BNIPL1| BNIPL2| PP73| PP753	BCL2/adenovirus E1B 19kD interacting protein like
979	F5	4.65579	14067	NM_007976	AI173222| Cf-5| Cf5	coagulation factor V
7009	Tmprss6	4.58391	71753	NM_027902	1300008A22Rik	transmembrane serine protease 6
11615	Syt13	4.57897	80976	NM_030725	5730409J20Rik| AI549909| mKIAA1427	synaptotagmin XIII
8501	Sox8	4.54033	20681	NM_011447		SRY (sex determining region Y)-box 8
5968	Chat	4.44929	12647	NM_009891	B230380D24Rik	choline acetyltransferase
19764	Muc2	4.44358	17831	NM_023566	2010015E03Rik| MCM| wnn	mucin 2
1486	Col10a1	4.41024	12813	NM_009925	Col10| Col10a-1	collagen, type X, alpha 1
21768	Klhl31	4.40653	244923	NM_172925	9830147P19Rik| D930047P17Rik| Kbtbd1	kelch-like 31
5505	D630045M09Rik	4.38831	432777	NR_045293	AU019512	RIKEN cDNA D630045M09 gene
15202	Fgl2	4.23534	14190	NM_008013	AI385601| musfiblp	fibrinogen-like protein 2
10654	Nanos1	4.14731	332397	NM_178421	NOS-1	nanos homolog 1 (Drosophila)
4250	Myt1l	4.1427	17933	NM_001093775	2900046C06Rik| 2900093J19Rik| C630034G21Rik| mKIAA1106| Nztf1| Pmng1| Png-1	myelin transcription factor 1-like
21134	1810064F22Rik	4.14105	69862	NR_027981		RIKEN cDNA 1810064F22 gene
6984	Apol7b	4.14031	278679	NM_001024848		apolipoprotein L 7b
19963	Gm21119	4.07286	100861668	NM_001270553		predicted gene, 21119
22698	L1cam	3.98942	16728	NM_008478	CD171| L1| N-CAM-L1| NCAM-L1	L1 cell adhesion molecule
13604	Gbp5	3.95048	229898	NM_153564	5330409J06Rik| Gbp5a	guanylate binding protein 5
12712	Gnb4	3.7841	14696	NM_013531	6720453A21Rik| G(beta)4	guanine nucleotide binding protein (G protein), beta 4
9959	Gm960	3.73548	381196	NM_001033447	Top6bl| TOPOVIBL	predicted gene 960
9748	A530050N04Rik	3.72189	442846	NR_045419		RIKEN cDNA A530050N04 gene
2086	Gm4302	3.65622	100043227	NM_001166634_1	100043227	predicted gene 4302
17590	Apold1	3.52623	381823	NM_001109914	Gm1075	apolipoprotein L domain containing 1
19964	4930467E23Rik	3.52435	626415	NM_001039553	ENSMUSG00000074453| OTTMUSG00000018948| TSAP	RIKEN cDNA 4930467E23 gene
17998	Psg23	3.517	56868	NM_020261	1620401C02Rik| cea11	pregnancy-specific glycoprotein 23
9204	Dlgap1	3.51587	224997	NM_027712	4933422O14Rik| 9630002F18| AI845682| AI848168| BB075781| D17Bwg0511e| Gkap| GKAP/SAPAP| GKPA/SAPAP| mKIAA4162| Sapap1	discs, large (Drosophila) homolog-associated protein 1
2083	Gm4303	3.51061	100043231	NM_001166638_3	100043231	predicted gene 4303
18797	Gm29683	3.49628	624549	NR_131145		predicted gene, 29683
16966	Atoh8	3.42437	71093	NM_153778	4933425C05Rik| bHLHa21| Hath6| Math6| okadin	atonal bHLH transcription factor 8
15261	Actr3b	3.40072	242894	NM_001004365	9630005C02| ARP11| Arp3b| Arp3beta| AW047569	ARP3 actin-related protein 3B
22238	Ccr9	3.32323	12769	NM_001166625	A130091K22Rik| Cmkbr10| GPR-9-6	chemokine (C-C motif) receptor 9
16952	Cd8b1	3.31838	12526	NM_009858	Cd8b| Ly-3| Ly-C| Lyt-3	CD8 antigen, beta chain 1
17809	Vmn1r65	3.31722	81013	NM_030738	V1rd6| V3R6	vomeronasal 1 receptor 65
16502	Ica1	3.29938	15893	NM_001252266	69kDa| ICA69	islet cell autoantigen 1
23222	Arhgap6	3.28764	11856	NM_009707	AI504284| RhoGAPX-1	Rho GTPase activating protein 6
8266	Pnldc1	3.28047	240023	NM_001034866	Gm313	poly(A)-specific ribonuclease (PARN)-like domain containing 1
2396	Gm11944	3.2792	100302648	NR_045708	OTTMUSG00000005017	predicted gene 11944
17236	5031434C07Rik	3.27125	100503613	NR_045987		RIKEN cDNA 5031434C07 gene
19387	Calcb	3.2671	116903	NM_054084	Calc2| CGRP2	calcitonin-related polypeptide, beta
1396	E030030I06Rik	3.26632	319887	NM_001254744		RIKEN cDNA E030030I06 gene
17489	Clec2g	3.26144	70809	NM_027562	4632413B12Rik| Clr-c| Clr-d| Clrc| Clrd| Clrx| Ddv10| Ocilrp1	C-type lectin domain family 2, member g
19729	B4galnt4	3.2581	330671	NM_177897	BC038881| beta4GalNAcT4| Gm1095	beta-1,4-N-acetyl-galactosaminyl transferase 4
2966	F930015N05Rik	3.25129	654805	NR_028445		RIKEN cDNA F930015N05 gene
22338	Lancl3	3.22677	236285	NM_173414	6030463G20Rik	LanC lantibiotic synthetase component C-like 3 (bacterial)
11298	Itga4	3.22538	16401	NM_010576	CD49D| Itga4B	integrin alpha 4
1157	Gm16432	3.22054	545391	NM_001034899	EG545391| EG666250	predicted gene 16432
2084	Gm4307	3.21735	100043239	NM_001166641	100043239	predicted gene 4307
22198	Vipr1	3.1507	22354	NM_011703	AV071699| VIP-R1| VPAC1	vasoactive intestinal peptide receptor 1
16999	Gm20362	3.11693	100504701	NR_040301		predicted gene, 20362
3771	Mpp2	3.11299	50997	NM_016695	D11Bwg0652e| Dlg2| Dlgh2| Pals4	membrane protein, palmitoylated 2 (MAGUK p55 subfamily member 2)
16851	Mturn	3.11217	68235	NM_001289741	2410066E13Rik| AI448550| B230212L03Rik	maturin, neural progenitor differentiation regulator homolog (Xenopus)
4270	Gpr22	3.11197	73010	NM_175191	2900068K05Rik| AW061316	G protein-coupled receptor 22
20221	2500002B13Rik	3.10505	78353	NR_126555		RIKEN cDNA 2500002B13 gene
4724	Serpina3k	3.10239	20714	NM_011458	1300001I07Rik| contrapsin| D12Rp54| MMCM2| MMSpi2| RP54| Spi-2| Spi2	serine (or cysteine) peptidase inhibitor, clade A, member 3K
1433	Enpp1	3.08965	18605	NM_008813	4833416E15Rik| AI428932| C76301| CD203c| E-NPP 1| E-NPP1| Ly-41| M6S1| NPP1| Npps| PC-1| Pca| Pca-1| Pdnp1| ttw| twy	ectonucleotide pyrophosphatase/phosphodiesterase 1
21488	Arhgap20os	3.07797	408028	NR_033560	9230115E21Rik	Rho GTPase activating protein 20, opposite strand
23174	Adgrg2	3.06013	237175	NM_178712	AW212196| B830041D06Rik| Gpr64| Me6	adhesion G protein-coupled receptor G2
22991	Nxf2	3.04961	83454	NM_031259	4930455N06Rik| Nxf-b	nuclear RNA export factor 2
14929	Znf41-ps	3.03712	70005	NR_040355	1700029I01Rik	ZNF41, pseudogene
1399	Raet1b	3.01366		NM_009017
22351	Tspan7	2.98449	21912	NM_019634	1200014P11Rik| A15| AI323365| Cd231| Mxs1| PE31| R74651| TALLA| Tm4sf2	tetraspanin 7
13536	Ccdc109b	2.97376	66815	NM_025779	9030408N13Rik| MCUb	coiled-coil domain containing 109B
22326	Ssxb8	2.97288	631002	NM_001081565		synovial sarcoma, X member B, breakpoint 8
1355	Gje1	2.9683	76743	NM_029722	AEY12| Cx23| D230044M03Rik| Gjf1| Gsfaey12	gap junction protein, epsilon 1
13411	Amigo1	2.96135	229715	NM_001004293	ali2| Amigo	adhesion molecule with Ig like domain 1
936	Gpr52	2.94034	620246	NM_001146330	EG620246	G protein-coupled receptor 52
14935	Gm13247	2.93496	100041433	NM_001243138	OTTMUSG00000011075	predicted gene 13247
19344	Nrip3	2.93435	78593	NM_020610	A330103B05Rik| D7H11orf14| ICRFP703B1614Q5.2	nuclear receptor interacting protein 3
2166	Lrrc10	2.93092	237560	NM_146242	D330003I11Rik| Hrlrrp| Serdin1	leucine rich repeat containing 10
4759	Cyp46a1	2.92515	13116	NM_010010	Cyp46	cytochrome P450, family 46, subfamily a, polypeptide 1
1867	Pcsk4	2.92473	18551	NM_008793	AI647044| L21221| NEC 3| NEC3| PC4| SPC5	proprotein convertase subtilisin/kexin type 4
15340	AI839979	2.9229	100740	NR_102275		expressed sequence AI839979
13650	Adgrl2	2.91739	99633	NM_001081298	AI450192| CIRL-2| Gm619| Lec1| Lphh1| Lphn2| mKIAA0786	adhesion G protein-coupled receptor L2
1824	Bc1	2.88762	100568459	NR_038088_1	Gm24367	brain cytoplasmic RNA 1
7010	Il2rb	2.87355	16185	NM_008368	CD122| IL-15Rbeta| Il-2/15Rbeta| Il-2Rbeta| IL15Rbeta| p70	interleukin 2 receptor, beta chain
11266	Hoxd3os1	2.84386	73429	NR_027899	1700064D17Rik| 1700109F18Rik	homeobox D3, opposite strand 1
22124	AU023762	2.82648	102688	NR_040760		expressed sequence AU023762
11208	Lrp2	2.81766	14725	NM_001081088	AI315343| AW536255| b2b1625.2Clo| D230004K18Rik| Gp330| Megalin	low density lipoprotein receptor-related protein 2
17052	Cyp26b1	2.78707	232174	NM_175475	CP26| P450RAI-2	cytochrome P450, family 26, subfamily b, polypeptide 1
22325	Ssxb3	2.78249	278174	NM_198898		synovial sarcoma, X member B, breakpoint 3
18028	Fosb	2.77709	14282	NM_008036		FBJ osteosarcoma oncogene B
9759	Adrb2	2.76896	11555	NM_007420	Adrb-2| Badm| Gpcr7	adrenergic receptor, beta 2
13572	4933401H06Rik	2.76633	71038	NR_040540		RIKEN cDNA 4933401H06 gene
18370	Aplp1	2.76454	11803	NM_007467		amyloid beta (A4) precursor-like protein 1
14853	Rsg1	2.76444	76166	NM_001081174	6330545A04Rik| Gm723	REM2 and RAB-like small GTPase 1
20741	Hydin	2.76444	244653	NM_172916	1700034M11Rik| 4930545D19Rik| 4932703P14| A830061H17| AC069308.21gm4| hy-3| hy3| hyrh	HYDIN, axonemal central pair apparatus protein
12874	Kcnab1	2.76241	16497	NM_010597	Akr8a8| Kvbeta1.1| mKv(beta)1	potassium voltage-gated channel, shaker-related subfamily, beta member 1
8424	Prss27	2.75262	213171	NM_175440	CAPH2| marapsin| Mpn	protease, serine 27
18279	Zfp850	2.75195	100043772	NM_001254951	100043772| C130069I09Rik| Gm4636	zinc finger protein 850
20295	Mef2b	2.74081	17259	NM_001045484	17259| AI451606	myocyte enhancer factor 2B
10662	Csf2ra	2.71717	12982	NM_009970	CD116| Csfgmra| GM-CSF-Ra| GM-CSFR	colony stimulating factor 2 receptor, alpha, low-affinity (granulocyte-macrophage)
20138	Zdhhc2	2.69605	70546	NM_178395	5730415P04Rik| 6430583A19Rik	zinc finger, DHHC domain containing 2
17838	Zfp418	2.67247	232854	NM_146179	A230102I05Rik	zinc finger protein 418
1255	Atf3	2.66992	11910	NM_007498	LRG-21	activating transcription factor 3
450	Serpine2	2.64623	20720	NM_009255	B230326M24Rik| PAI-1| PI-7| PI7| PN-1| Spi4	serine (or cysteine) peptidase inhibitor, clade E, member 2
15052	Morn1	2.64041	76866	NM_001081100	2900057D20Rik| 4930417P05Rik| AU042805	MORN repeat containing 1
2264	Myo1a	2.64003	432516	NM_001081219	BBM-I| Myhl	myosin IA
5786	Gm3317	2.61717	666329	NM_001242941	100041401	predicted gene 3317
1292	H60c	2.58989	670558	NM_001204916	4632413I24Rik| 670558| Gm9491	histocompatibility 60c
2288	Apof	2.58705	103161	NM_133997	AI255964	apolipoprotein F
9867	Slc14a2	2.58624	27411	NM_207651	UT-A1| UT-A3	solute carrier family 14 (urea transporter), member 2
15683	Ereg	2.58226	13874	NM_007950	EPR	epiregulin
2713	Rnf130	2.57368	59044	NM_001290750	2510042A13Rik| G1rp| G1RZFP| GOLIATH| GP	ring finger protein 130
917	Ralgps2	2.5673	78255	NM_001159965	1810020P17Rik| 2210408F11Rik| 4921528G01Rik| 9130014M22Rik| AU043409| AW046161	Ral GEF with PH domain and SH3 binding motif 2
11289	Ttn	2.56633	22138	NM_028004	1100001C23Rik| 2310036G12Rik| 2310057K23Rik| 2310074I15Rik| AF006999| AV006427| D330041I19Rik| D830007G01Rik| L56| mdm| shru	titin
3923	Cpsf4l	2.53546	52670	NM_026682	0610010C04Rik| 1500000C01Rik| D11Ertd636e	cleavage and polyadenylation specific factor 4-like
20696	4930506A18Rik	2.53209	75044	NR_126090		RIKEN cDNA 4930506A18 gene
2741	Col23a1	2.52236	237759	NM_153393	2810458L13Rik| AI429655	collagen, type XXIII, alpha 1
22683	Zfp92	2.51785	22754	NM_009566		zinc finger protein 92
5268	Cenpp	2.51474	66336	NM_025495	1700022C02Rik| 4921518G09Rik	centromere protein P
1718	Lrrc75b	2.50621	192734	NM_198860	AI646023| Fam211b	leucine rich repeat containing 75B
12993	Crabp2	2.50385	12904	NM_007759	AI893628| Crabp-2| CrabpII	cellular retinoic acid binding protein II
6427	Piwil2	2.49971	57746	NM_021308	mili| Piwil1l	piwi-like RNA-mediated gene silencing 2
1342	Plagl1	2.49001	22634	NM_009538	Lot1| Zac1	pleiomorphic adenoma gene-like 1
2184	Tmevpg1	2.4854	103214	NR_104123	AI447422	Theiler's murine encephalomyelitis virus persistence candidate gene 1
23178	Cdkl5	2.47255	382253	NM_001024624	BC038161| Stk9	cyclin-dependent kinase-like 5
14729	Extl1	2.46106	56219	NM_019578	D430033M16Rik	exostoses (multiple)-like 1
18962	Ccdc89	2.46106	70054	NM_027298	1700019B01Rik| AU022100| BOIP	coiled-coil domain containing 89
14232	Cyp2j13	2.45967	230459	NM_145548		cytochrome P450, family 2, subfamily j, polypeptide 13
1095	Fcrl6	2.45447	677296	NM_001164725	ENSMUSG00000070504| FcRH6| mIFGP6| moFcRH6	Fc receptor-like 6
15464	Kcnip4	2.45207	80334	NM_030265	AV032399| Calp| Calp250| KChIP4| KChIP4a	Kv channel interacting protein 4
22518	Gria3	2.44966	53623	NM_016886	2900064I19Rik| GluA3| Glur-3| GluR-C| GluR-K3| Glur3| Gluralpha3	glutamate receptor, ionotropic, AMPA3 (alpha 3)
16024	Tmem116	2.44908	77462	NM_029912	4930406A18Rik| 4930513P12Rik| C030022K24Rik	transmembrane protein 116
16819	Hoxaas2	2.4445	105242657	NR_131182	2810043O09Rik| 5730446D14Rik	Hoxa cluster antisense RNA 2
2164	D630029K05Rik	2.43463	103175	NR_027847	AI314111| AI875589	RIKEN cDNA D630029K05 gene
6461	5031414D18Rik	2.41907	271221	NM_198642	Gm744| Gm911| Kiaa0226l	RIKEN cDNA 5031414D18 gene
14126	C630043F03Rik	2.40307	68285	NR_027923	AI851307	RIKEN cDNA C630043F03 gene
12777	2610316D01Rik	2.39368	72511	NR_045172		RIKEN cDNA 2610316D01 gene
22760	Gm8787	2.39096	667736	NM_001099310	EG667736	predicted gene 8787
19711	Zfp941	2.38899	407812	NM_001001180		zinc finger protein 941
16496	Col28a1	2.38763	213945	NM_001037865	Col28| Gm466	collagen, type XXVIII, alpha 1
15745	A930011G23Rik	2.365	319818	NR_030692		RIKEN cDNA A930011G23 gene
17073	Cml2	2.36219		NM_053096
8773	Sapcd1	2.36149	78376	NR_028258	2810436B06Rik| G7d| Ng23	suppressor APC domain containing 1
5456	Zfp458	2.36084	238690	NM_001001152	BC062958| mszf59-2| Rslcan-7| Znf728	zinc finger protein 458
20082	4933416M07Rik	2.35734	71082	NR_045840		RIKEN cDNA 4933416M07 gene
14540	Pou3f1	2.3548	18991	NM_011141	Oct-6| Oct6| Otf-6| Otf6| Scip| Test1| Tst-1| Tst1	POU domain, class 3, transcription factor 1
11701	Ano3	2.35393	228432	NM_001128103	AI838058| B230324K02Rik| Tmem16c	anoctamin 3
2115	Otogl	2.34868	628870	NM_001177567	EG628870| Gm6924	otogelin-like
21487	Arhgap20	2.33983	244867	NM_175535	6530403F17Rik| A530023E23Rik| mKIAA1391	Rho GTPase activating protein 20
13107	9130204L05Rik	2.33453	229550	NM_001101461	Gm127	RIKEN cDNA 9130204L05 gene
19673	Adgra1	2.33073	52389	NM_177469	2900059M17Rik| D7Ertd680e| Gpr123	adhesion G protein-coupled receptor A1
13179	Riiad1	2.32829	66353	NM_025506	2310007A19Rik| Ncrna00166	regulatory subunit of type II PKA R-subunit (RIIa) domain containing 1
14231	Hook1	2.32732	77963	NM_030014	A930033L17Rik| azh	hook microtubule tethering protein 1
4324	Prkd1	2.32452	18760	NM_008858	Pkcm| PKD| PKD1| Prkcm	protein kinase D1
4396	Wdr20rt	2.32367	70948	NM_027614	4921538B03Rik| 4930427E19Rik| Wdr20| Wdr20b	WD repeat domain 20, retrogene
10136	Stxbp3-ps	2.32175	619371	NR_073559	Munc18c(L)| Stxbp3-1| Stxbp3b	syntaxin-binding protein 3, pseudogene
19626	Lhpp	2.31561	76429	NM_029609	2310007H09Rik	phospholysine phosphohistidine inorganic pyrophosphate phosphatase
12241	Ggt7	2.31213	207182	NM_144786	1110017C11Rik| 6330563L03Rik| Ggtl3	gamma-glutamyltransferase 7
4725	Serpina3m	2.30899	20717	NM_009253	3e46| AI195004| MMCM7| MMSPi2.4| Spi-2l| Spi-2rs1| spi2| Spi2-rs1| Spi2.4	serine (or cysteine) peptidase inhibitor, clade A, member 3M
9659	Ccdc112	2.30821	240261	NM_001160399	8430438M01Rik| AW108467	coiled-coil domain containing 112
14747	Ncmap	2.30633	230822	NM_001243306	A330049M08Rik| AA545175| Mp11	noncompact myelin associated protein
2230	Mettl21b	2.30433	100504608	NM_001205036		methyltransferase like 21B
9684	Prr16	2.30269	71373	NM_001081224	5430406M13Rik| AI607429	proline rich 16
13183	BC021767	2.30151	545551	NR_033629		cDNA sequence BC021767
2111	Lin7a	2.301	108030	NM_001039354	AI848705| LIN-7A| MALS-1| TIP-33| Veli| Veli1	lin-7 homolog A (C. elegans)
1502	2010001E11Rik	2.28373		NM_001163503
4600	Angel1	2.27713	68737	NM_144524	1110030H02Rik| mKIAA0759	angel homolog 1 (Drosophila)
4774	Rian	2.27707	75745	NR_028261	5530401N18Rik| C130089L09Rik| Meg8	RNA imprinted and accumulated in nucleus
4702	Ppp4r4	2.27139	74521	NM_028980	8430415E04Rik| mKIAA1622	protein phosphatase 4, regulatory subunit 4
23183	Bc1	2.26969	100568459	NR_038088	Gm24367	brain cytoplasmic RNA 1
14792	Rap1gap	2.26949	110351	NM_029563	1300019I11Rik| 2310004O14Rik| AI427470| ARPP-90| Gap| Rap1ga1| Rap1GAP1	Rap1 GTPase-activating protein
8522	0610011F06Rik	2.26469	68347	NM_026686		RIKEN cDNA 0610011F06 gene
14984	Pik3cd	2.26455	18707	NM_001164051	2410099E07Rik| 2610208K16Rik| AW545373| p110delta	phosphatidylinositol 3-kinase catalytic delta polypeptide
8610	Pim1	2.26432	18712	NM_008842	Pim-1	proviral integration site 1
21459	Gm11149	2.26272	100036537	NR_029465	ENSMUSG00000060603| ENSMUSG00000079564	predicted gene 11149
8647	Notch3	2.26201	18131	NM_008716	AW229011| hpbk| N3	notch 3
2161	Myrfl	2.25598	237558	NM_001033333	Gm239	myelin regulatory factor-like
4507	9430078K24Rik	2.25541	77290	NR_131073		RIKEN cDNA 9430078K24 gene
2503	Vstm2a	2.25422	211739	NM_001290539	Vstm2	V-set and transmembrane domain containing 2A
4935	Sugct	2.24848	192136	NM_138654	5033411D12Rik| D17907	succinyl-CoA glutarate-CoA transferase
3513	Itga3	2.24369	16400	NM_001306162	AA407068| CD49C| GAPB3	integrin alpha 3
593	Sned1	2.23504	208777	NM_172463	6720455I24Rik| AI197264| AI642697| D430044C15Rik| Snep| SST3	sushi, nidogen and EGF-like domains 1
17467	Prmt8	2.23162	381813	NM_201371	Hrmt1l3| Hrmt1l4	protein arginine N-methyltransferase 8
1541	Cd24a	2.22159	12484	NM_009846	Cd24| HSA| Ly-52| nectadrin	CD24a antigen
22960	4932411N23Rik	2.21604	237029	NM_177705		RIKEN cDNA 4932411N23 gene
19237	Hpx	2.21518	15458	NM_017371	Hpxn| hx	hemopexin
13774	Slc7a13	2.2074	74087	NM_028746	0610009O04Rik| AGT-1| AGT1| XAT2	solute carrier family 7, (cationic amino acid transporter, y+ system) member 13
9083	Gm20098	2.2048	100504169	NR_045095		predicted gene, 20098
9515	Psd2	2.20077	74002	NM_028707	6330404E20Rik| AW125584| EFA6C	pleckstrin and Sec7 domain containing 2
12727	Gm6639	2.19902	625963	NR_040748	625963	predicted gene 6639
21507	Elmod1	2.19672	270162	NM_177769	4831417L10| AI428506| AI834991	ELMO/CED-12 domain containing 1
8045	Btg3	2.19631	12228	NM_009770	ANA| tob5	B cell translocation gene 3
9960	Sptbn2	2.19014	20743	NM_021287	mKIAA0302| Spnb3	spectrin beta, non-erythrocytic 2
2180	Mdm1	2.18952	17245	NM_148922	Arrd2| Mdm-1	transformed mouse 3T3 cell double minute 1
22895	Magee2	2.18689	272790	NM_053206	9630059J11Rik| BB131182| Mage-e2	melanoma antigen, family E, 2
12134	Vsx1	2.18034	114889	NM_054068	CHX10-like	visual system homeobox 1
20794	1700030J22Rik	2.17792	69528	NM_027103		RIKEN cDNA 1700030J22 gene
22473	Rnf113a1	2.17687	69942	NM_153503	2810428C21Rik| Rnf113a	ring finger protein 113A1
18998	Gm16938	2.17361	330599	NR_045969		predicted gene, 16938
4512	Scarna3b	2.17226	100217447	NR_028544	MBI-100	small Cajal body-specific RNA 3B
15808	Btbd8	2.1708	100503185	NM_001255991	EG627196| Gm16115| OTTMUSG00000030610	BTB (POZ) domain containing 8
20	Mybl1	2.16537	17864	NM_008651	A-myb| G1-419-6| repro9	myeloblastosis oncogene-like 1
15157	Abcb1b	2.16091	18669	NM_011075	Abcb1| mdr| Mdr1| Mdr1b| Pgy-1| Pgy1	ATP-binding cassette, sub-family B (MDR/TAP), member 1B
20599	Ndrg4	2.14832	234593	NM_145602	D8Bwg1337e| Ndr1-rs| Ndr4| R74996| SMAP-8	N-myc downstream regulated gene 4
15147	Steap1	2.13849	70358	NM_027399	2410007B19Rik| Prss24| Steap	six transmembrane epithelial antigen of the prostate 1
21458	Ncam1	2.137	17967	NM_001081445	CD56| E-NCAM| Ncam| NCAM-1	neural cell adhesion molecule 1
13333	Syt6	2.13457	54524	NM_001276679	3110037A08Rik| AW048930| sytVI	synaptotagmin VI
9657	Trim36	2.13299	28105	NM_001170855	D18Wsu100e| haprin	tripartite motif-containing 36
12475	Bmp7	2.13282	12162	NM_007557	OP1	bone morphogenetic protein 7
17026	Wdr54	2.12622	75659	NM_023790	1700030E05Rik	WD repeat domain 54
17099	D6Ertd527e	2.12241	52372	NM_001167938	AU043841	DNA segment, Chr 6, ERATO Doi 527, expressed
9590	Pcdhga7	2.12179	93715	NM_033590		protocadherin gamma subfamily A, 7
5982	Gdf10	2.11845	14560	NM_145741	Bmp3b	growth differentiation factor 10
2177	Nup107	2.1166	103468	NM_134010	AW541137| C76801	nucleoporin 107
16508	Thsd7a	2.10545	330267	NM_001164805	Gm837	thrombospondin, type I, domain containing 7A
21125	Elavl3	2.09598	15571	NM_010487	2600009P04Rik| Huc| mHuC| PLE21	ELAV (embryonic lethal, abnormal vision, Drosophila)-like 3 (Hu antigen C)
12345	Ada	2.09564	11486	NM_007398		adenosine deaminase
15797	Lrrc8c	2.09	100604	NM_133897	AD158| AI326115| E430036I04Rik| fad158	leucine rich repeat containing 8 family, member C
1852	Sbno2	2.08545	216161	NM_183426	BC019206| F730040C21| Sno| Stno	strawberry notch homolog 2 (Drosophila)
594	Mterf4	2.07687	69821	NM_178051	1810059A23Rik| 4933412H03Rik| Mterfd2	mitochondrial transcription termination factor 4
20732	Snord71	2.07619	100217432	NR_028532	MBII-239	small nucleolar RNA, C/D box 71
22231	Tmem158	2.07544	72309	NM_001002267	2310037P21Rik| Ris1	transmembrane protein 158
4570	Syndig1l	2.07478	627191	NM_001033334	DSPC1| Gm261| Tmem90a	synapse differentiation inducing 1 like
22193	Ulk4	2.07457	209012	NM_177589	4932415A06Rik| A730098P15	unc-51-like kinase 4
22509	Tmem255a	2.07403	245386	NM_001289727	4933417N17| 6430550H21Rik| Fam70a	transmembrane protein 255A
1670	Dnajc12	2.07368	30045	NM_001253685	Jdp1| mJDP1	DnaJ heat shock protein family (Hsp40) member C12
10187	Ms4a6c	2.07349	73656	NM_028595	2200009H22Rik| 2210417N07Rik	membrane-spanning 4-domains, subfamily A, member 6C
20042	Sfrp1	2.07346	20377	NM_013834	2210415K03Rik| AW011917| AW107218| AW742929| sFRP-1	secreted frizzled-related protein 1
21709	Gcnt3	2.07327	72077	NM_028087	2010013H22Rik| 2210021I22Rik| 2210401J11Rik	glucosaminyl (N-acetyl) transferase 3, mucin type
17157	Uroc1	2.07286	243537	NM_144940	AI265605| BC022133	urocanase domain containing 1
22036	Ccdc36	2.07249	434438	NM_001135198		coiled-coil domain containing 36
3552	Hoxb1	2.07234	15407	NM_008266	Hox-2.9	homeobox B1
16624	Akr1b7	2.07226	11997	NM_009731	AR| Avdp| MVDP	aldo-keto reductase family 1, member B7
16618	Lrguk	2.07132	74354	NM_028886	4921528H16Rik	leucine-rich repeats and guanylate kinase domain containing
1644	Tspan15	2.07109	70423	NM_197996	1110036D12Rik| 2700063A19Rik| AW048364| Tm4sf15	tetraspanin 15
5785	Gm3488	2.07073	100041735	NM_001256885	100041735| 100041747| Gm3494	predicted gene, 3488
11593	Lrp4	2.07037	228357	NM_001145857	6430526J12Rik| D230026E03| mdig| Megf7	low density lipoprotein receptor-related protein 4
19724	Ifitm5	2.07019	73835	NM_053088	1110003J06Rik| AW213665| Bril| DSPA1| Hrmp1| Hrtm1	interferon induced transmembrane protein 5
22137	Trim71	2.07004	636931	NM_001042503	2610206G21Rik| 636931| AL022943| Gm1127| lin-41| Lin41| mlin-41| mLin41| Ripply2	tripartite motif-containing 71
3431	Ppm1e	2.06949	320472	NM_177167	AW049266| B930008A12Rik| mKIAA1072| POPX1| PP2CH	protein phosphatase 1E (PP2C domain containing)
3814	1700023F06Rik	2.06932	69441	NM_001254724		RIKEN cDNA 1700023F06 gene
11157	Upp2	2.06802	76654	NM_001289660	1700124F02Rik| AI266885| UDRPASE2| UP2| UPASE2	uridine phosphorylase 2
17849	Vmn2r47	2.06802	100042891	NM_001105151_3		vomeronasal 2, receptor 47
3908	Abca5	2.06204	217265	NM_147219	ABC13| B930033A02Rik| mKIAA1888	ATP-binding cassette, sub-family A (ABC1), member 5
16701	Ephb6	2.05543	13848	NM_001146351	Cekl| Mep	Eph receptor B6
8013	Stx19	2.04762	68159	NM_026588	A030009B12Rik	syntaxin 19
6548	5430440P10Rik	2.04732	71362	NR_045859		RIKEN cDNA 5430440P10 gene
14932	Gm13051	2.0445	626316	NM_001037926	OTTMUSG00000010104| OTTMUSG00000010173| RP23-383I4.2	predicted gene 13051
16204	Rasa4	2.04058	54153	NM_133914	AA793972| AW112107| BB079060| CAPRI| GAPL	RAS p21 protein activator 4
864	C730036E19Rik	2.03861	402734	NR_038011	lncLSTR	RIKEN cDNA C730036E19 gene
15152	Adam22	2.02891	11496	NM_001098225	2900022I03Rik| AI854032| MDC2	a disintegrin and metallopeptidase domain 22
3020	Alox8	2.02684	11688	NM_009661	15-LOX-2| 15-LOX-B| 8-LOX| 8S-LOX| Alox15b	arachidonate 8-lipoxygenase
12621	Zfp704	2.02112	170753	NM_133218	C030026M03| C030034L19Rik| Gig1| Znf704	zinc finger protein 704
15679	Cxcl1	2.02058	14825	NM_008176	Fsp| gro| Gro1| KC| Mgsa| N51| Scyb1	chemokine (C-X-C motif) ligand 1
9818	4930503L19Rik	2.01878	269033	NM_172967	9930107F24| BB148262| Lars| Las2	RIKEN cDNA 4930503L19 gene
1401	H60b	2.0176	667281	NM_001177775	EG667281	histocompatibility 60b
23184	Reps2	2.01461	194590	NM_001290633	POB1	RALBP1 associated Eps domain containing protein 2
22966	Pcdh19	2.01158	279653	NM_001105245	B530002L05Rik| Gm717| mKIAA1313	protocadherin 19
8242	Pde10a	2.00443	23984	NM_001290707		phosphodiesterase 10A
11233	Dlx1	2.0027	13390	NM_010053	Dlx| Dlx-1	distal-less homeobox 1
9156	Tubb4a	2.0021	22153	NM_009451	AI325297| M(beta)4| Tubb| Tubb4	tubulin, beta 4A class IVA
8720	H2-DMa	2.00068	14998	NM_010386	H-2Ma| H2-Ma	histocompatibility 2, class II, locus DMa
10625	B230217O12Rik	1.99977	320879	NR_040316		RIKEN cDNA B230217O12 gene
11739	Olfr1317	1.99915	258440	NM_146448	MOR245-4	olfactory receptor 1317
2172	Lyz1	1.99706	17110	NM_013590	Lyz| Lyzf3| Lzp-s	lysozyme 1
5747	Emb	1.99144	13723	NM_010330	AL022799| Gp70	embigin
4231	Id2	1.99027	15902	NM_010496	AI255428| bHLHb26| C78922| Idb2	inhibitor of DNA binding 2
15034	Ccdc27	1.98941	381580	NM_001033455	Gm1035	coiled-coil domain containing 27
17239	Oxtr	1.98659	18430	NM_001081147	OTR	oxytocin receptor
10303	Tmc1	1.98279	13409	NM_028953	4933416G09Rik| Beethoven| Bth| CWEA1| dn	transmembrane channel-like gene family 1
15313	Cgref1	1.98114	68567	NM_001160149	1110004G24Rik| AW045201| Cgr11	cell growth regulator with EF hand domain 1
738	Slc45a3	1.97963	212980	NM_001177628	2210413P12Rik| AU023994| AU043764| IPCA-6| Pcanap6| PRST	solute carrier family 45, member 3
6081	Otx2	1.97687	18424	NM_001286483	E130306E05Rik	orthodenticle homeobox 2
21689	Aph1c	1.97674	68318	NM_026674	0610008A10Rik| APH-1b| Aph1b	aph1 homolog C, gamma secretase subunit
14810	Pla2g2d	1.97581	18782	NM_011109	mGIID| Splash	phospholipase A2, group IID
23180	Scml2	1.97565	107815	NM_001290652	4932420G07Rik	sex comb on midleg-like 2 (Drosophila)
9251	Sult6b1	1.97546	73671	NM_001163625	2410078J06Rik| AV101767| ST6B1	sulfotransferase family, cytosolic, 6B, member 1
6770	Tmem74	1.97475	239408	NM_175502	AA549547| B230382K22Rik	transmembrane protein 74
4339	Npas3	1.97414	27386	NM_013780	4930423H22Rik| bHLHe12	neuronal PAS domain protein 3
17000	Gm20594	1.97327	100463512	NM_001190732	Mtrnr2l	predicted gene, 20594
16256	Smok3a	1.96874	545814	NM_001168602	Smok2b1	sperm motility kinase 3A
3934	Gprc5c	1.96505	70355	NM_001110337	1110028I06Rik| 3200002M13Rik| Raig3	G protein-coupled receptor, family C, group 5, member C
15069	Tmem240	1.96445	381582	NM_001101506	EG381582| Gm5151	transmembrane protein 240
12917	Serpini1	1.96351	20713	NM_009250	AI837402| Ns| PI-12| PI12| Spi17	serine (or cysteine) peptidase inhibitor, clade I, member 1
21790	Gm10635	1.96257	100038575	NR_045336	ENSMUSG00000074174	predicted gene 10635
4896	Adarb2	1.96171	94191	NM_001289530	Adar3| RED2	adenosine deaminase, RNA-specific, B2
10648	2700089I24Rik	1.95793	72647	NR_045308		RIKEN cDNA 2700089I24 gene
22571	C430049B03Rik	1.95715	72575	NR_038184	2700063P19Rik| 9430052C07Rik| mir-322| mir-351| mir-503	RIKEN cDNA C430049B03 gene
15962	Cit	1.95666	12704	NM_007708	C030025P15Rik| Cit-k| CRIK| CRIK-SK	citron
11910	Fam227b	1.95654	75823	NM_029455	4930525F21Rik	family with sequence similarity 227, member B
19738	Rassf7	1.95542	66985	NM_025886	2400009B11Rik| AW210608	Ras association (RalGDS/AF-6) domain family (N-terminal) member 7
8846	H2-Bl	1.95439	14963	NM_008199	H2-B1| H2-Bl-like	histocompatibility 2, blastocyst
13927	Fam221b	1.95358	242408	NM_175517	4930412F15Rik	family with sequence similarity 221, member B
20540	Crnde	1.95254	71296	NR_033641	4933436C20Rik	colorectal neoplasia differentially expressed (non-protein coding)
6882	Ptp4a3	1.94672	19245	NM_001166389	AV088979| pPtp4a3| Prl-3	protein tyrosine phosphatase 4a3
2168	Frs2	1.94502	327826	NM_177798	4732458E18| C330018A15Rik| Frs2alpha| SNT1	fibroblast growth factor receptor substrate 2
14934	Gm13251	1.94453	433791	NM_001085522	OTTMUSG00000011097	predicted gene 13251
9593	Pcdhgb5	1.94235	93702	NM_033577		protocadherin gamma subfamily B, 5
9592	Pcdhga8	1.941	93716	NM_033591	mKIAA4054	protocadherin gamma subfamily A, 8
9047	Frs3os	1.94041	100126242	NR_045913	4930417B13Rik| Gm14873| OTTMUSG00000018358	fibroblast growth factor receptor substrate 3, opposite strand
11702	Muc15	1.93976	269328	NM_172979	4732460E09| D730046L02Rik| MUC-15	mucin 15
15276	En2	1.93945	13799	NM_010134	BB131122| En-2	engrailed 2
18750	Ndn	1.93781	17984	NM_010882	AI528698| Peg6	necdin
2054	2310039L15Rik	1.93597	69629	NR_045337		RIKEN cDNA 2310039L15 gene
23105	Tro	1.93197	56191	NM_001002272	AA409408| Maged3| Maged3l| magphinin| Tnn| Trol	trophinin
22935	Hdx	1.92622	245596	NM_001290459	D030011N01Rik| Gm380	highly divergent homeobox
4636	Nrxn3	1.92593	18191	NM_001198587		neurexin III
7575	Snai2	1.92552	20583	NM_011415	Slug| Slugh| Snail2	snail family zinc finger 2
5774	D830030K20Rik	1.92471	320333	NM_177135		RIKEN cDNA D830030K20 gene
6030	1700001F09Rik	1.92379	71826	NM_027940	Gm10377	RIKEN cDNA 1700001F09 gene
3341	Cct6b	1.91812	12467	NM_009839	CCT-zeta-2| Cctz-2| CCTzeta-2| TCP-1-zeta-2	chaperonin containing Tcp1, subunit 6b (zeta)
2171	Lyz2	1.91653	17105	NM_017372	AI326280| Lys| Lysm| Lyzf2| Lyzs| Lzm| Lzm-s1| Lzp	lysozyme 2
10392	Fas	1.91502	14102	NM_007987	AI196731| APO1| APT1| CD95| lpr| TNFR6| Tnfrsf6	Fas (TNF receptor superfamily member 6)
16839	9430076C15Rik	1.91147		NR_015553
1504	BC021785	1.91125		NM_001113388
22666	Zfp185	1.91097	22673	NM_001109043	P1| Znf185	zinc finger protein 185
242	Dnah7a	1.91012	627872	NM_001252070	Dnahc7| Dnahc7a| Gm992	dynein, axonemal, heavy chain 7A
22693	Plxnb3	1.90932	140571	NM_019587	AI451018| Plxn6	plexin B3
2865	Trim17	1.90796	56631	NM_031172	Rnf16| terf	tripartite motif-containing 17
9508	Spata24	1.90751	71242	NM_029485	2700012K08Rik| 4930583E11Rik| 5133400G04Rik| AU016220| TIPT| TIPT2	spermatogenesis associated 24
2080	Kitl	1.90527	17311	NM_013598	blz| Clo| Con| contrasted| Gb| Kitlg| Mgf| SCF| SF| Sl| SLF	kit ligand
10376	Asah2	1.8998	54447	NM_018830	AI585898	N-acylsphingosine amidohydrolase 2
15413	Crmp1	1.89949	12933	NM_001136058	CRMP-1| Dpysl1| DRP-1| ULIP-3| Ulip3	collapsin response mediator protein 1
13559	Cxxc4	1.89918	319478	NM_001004367	9330210J02Rik| C030003J12Rik| Idax	CXXC finger 4
5255	Zfp169	1.89893	67911	NM_001164576	1700025J14Rik| 4930429A13Rik| BE688704	zinc finger protein 169
4159	Mfsd2b	1.89747	432628	NM_001033488	Gm1964	major facilitator superfamily domain containing 2B
5147	Serpinb1a	1.8974	66222	NM_025429	1190005M04Rik| AI325983| EI| EIA| ELANH2| LEI| M/NEI| MNEI| PI2	serine (or cysteine) peptidase inhibitor, clade B, member 1a
14933	Zfp600	1.89534	667666	NM_001177546	Gm13164| OTTMUSG00000010694	zinc finger protein 600
14610	Fndc5	1.89305	384061	NM_027402	1500001L03Rik| AI836596| C87088| PeP| Pxp	fibronectin type III domain containing 5
4527	Slc8a3	1.89275	110893	NM_001167920	AW742262| Ncx3	solute carrier family 8 (sodium/calcium exchanger), member 3
10074	Fermt3	1.89064	108101	NM_153795	C79673| Kindlin3	fermitin family member 3
13300	Spag17	1.88993	74362	NM_028892	4931427F14Rik| PF6| Spag17-ps	sperm associated antigen 17
14249	Angptl3	1.88881	30924	NM_013913	hypl	angiopoietin-like 3
19497	Cln3	1.88649	12752	NM_001146311	AI323623	ceroid lipofuscinosis, neuronal 3, juvenile (Batten, Spielmeyer-Vogt disease)
18559	Lrrc4b	1.8855	272381	NM_198250	A830007M12| Lrig4	leucine rich repeat containing 4B
9344	Bambi	1.88371	68010	NM_026505	2610003H06Rik	BMP and activin membrane-bound inhibitor
1505	AI317395	1.88353		NM_144821
15234	Asic3	1.88266	171209	NM_183000	Accn3| AW742291| DRASIC| SLNAC1| TNAC1	acid-sensing (proton-gated) ion channel 3
23033	Slc25a53	1.88176	67062	NM_001114179	2310046F18Rik| 2810402A17Rik| AI448995| AI841128| Mcart6	solute carrier family 25, member 53
17592	Gprc5a	1.8803	232431	NM_181444	Rai3| Raig1	G protein-coupled receptor, family C, group 5, member A
814	5730559C18Rik	1.87925	67313	NM_028872	1700034M08Rik| 4933426C09Rik| AI586180| D1Mgi54	RIKEN cDNA 5730559C18 gene
22324	Ssxb6	1.87883	668976	NM_001205108		synovial sarcoma, X member B, breakpoint 6
22322	Ssxb2	1.87643	387132	NM_001001450		synovial sarcoma, X member B, breakpoint 2
10287	Prune2	1.87538	353211	NM_181348	6330414G02Rik| A230083H22Rik| A330102H22Rik| Bmcc1| mKIAA0367	prune homolog 2 (Drosophila)
16254	Gjc3	1.87269	118446	NM_080450	Cx29| Gje1	gap junction protein, gamma 3
10056	Nrxn2	1.87113	18190	NM_020253	6430591O13Rik| mKIAA0921	neurexin II
7936	G730013B05Rik	1.87044	619312	NR_040380	linc-Cblb| linc1610	RIKEN cDNA G730013B05 gene
1294	Iyd	1.86758	70337	NM_027391	0610009A07Rik| AI265638| Dehal1	iodotyrosine deiodinase
15459	Lcorl	1.86741	209707	NM_178142	Mlr1	ligand dependent nuclear receptor corepressor-like
5551	Lysmd3	1.86694	80289	NM_030257	1110030H10Rik| BC003322	LysM, putative peptidoglycan-binding, domain containing 3
13419	Psrc1	1.8666	56742	NM_001190161	5430413I02Rik| AL033312| Dda3	proline/serine-rich coiled-coil 1
925	Astn1	1.86503	11899	NM_007495	Astn| GC14| mKIAA0289	astrotactin 1
7272	Vdr	1.86302	22337	NM_009504	Nr1i1	vitamin D receptor
13004	Tsacc	1.86257	76927	NM_029801	1700021C14Rik| SIP	TSSK6 activating co-chaperone
18724	Siglech	1.8588	233274	NM_178706	6430529G09Rik| Siglec-H	sialic acid binding Ig-like lectin H
4100	Pycr1	1.8573	209027	NM_144795		pyrroline-5-carboxylate reductase 1
5285	S1pr3	1.85271	13610	NM_010101	AI132464| Edg3| Lpb3| S1p3	sphingosine-1-phosphate receptor 3
20836	Foxf1	1.85098	15227	NM_010426	AI450827| Foxf1a| Freac-1| FREAC1| HFH-8| Hfh8	forkhead box F1
4307	Scin	1.84987	20259	NM_001146196	adseverin| AW545522	scinderin
9687	Lox	1.84852	16948	NM_001286182	AI893619| rrg| TSC-160	lysyl oxidase
21869	Pcolce2	1.84754	76477	NM_029620	2400001O18Rik| Pcpe2	procollagen C-endopeptidase enhancer 2
16911	Gprin3	1.84673	243385	NM_183183	C030038J10Rik| C730021L23	GPRIN family member 3
8618	Mdga1	1.84326	74762	NM_001081160	1200011I03Rik| GPIM| Mamdc3	MAM domain containing glycosylphosphatidylinositol anchor 1
8650	Gm4432	1.84245	100043434	NR_102329	100043434	predicted gene 4432
15500	5830416I19Rik	1.84245	74757	NR_045384		RIKEN cDNA 5830416I19 gene
9980	Tmem151a	1.8391	381199	NM_001001885	AW125688| Gm961| Tmem151	transmembrane protein 151A
11776	Gm13986	1.83852	329496	NR_126479	C230060E24| OTTMUSG00000015236	predicted gene 13986
16779	Gimap9	1.83692	317758	NM_174960	A630002K24| BB145400	GTPase, IMAP family member 9
8952	9130008F23Rik	1.83461	71583	NM_027834		RIKEN cDNA 9130008F23 gene
10310	Trpm3	1.833	226025	NM_001035241	6330504P12Rik| 9330180E14| AU018608| B930001P07Rik| LTRPC3| MLSN2	transient receptor potential cation channel, subfamily M, member 3
2173	Cpsf6	1.83098	432508	NM_001013391	4733401N12Rik| AI256641| CFIM| CFIM68| HPBRII-4| HPBRII-7	cleavage and polyadenylation specific factor 6
12965	Glt28d2	1.83085	320302	NM_177130	4732486J07Rik| Glt28d1l	glycosyltransferase 28 domain containing 2
23177	Rs1	1.82965	20147	NM_011302	Rs1h| tmgc1| Xlrs1	retinoschisis (X-linked, juvenile) 1 (human)
1681	Zfp365	1.82945	216049	NM_178679	AI839779| AV340892| DBZ| Su48| talanin| Znf365	zinc finger protein 365
22156	Itga9	1.82908	104099	NM_133721	(alpha)9| 2610002H11Rik| 6720458D17Rik| AI461869| D130073C02| D9Ertd428e	integrin alpha 9
15040	Prdm16	1.82885	70673	NM_001291029	5730557K01Rik| csp1| mel1	PR domain containing 16
2117	Ppp1r12a	1.82811	17931	NM_027892	1200015F06Rik| 5730577I22Rik| AA792106| AV099298| D10Ertd625e| Mypt1	protein phosphatase 1, regulatory (inhibitor) subunit 12A
16718	Fam131b	1.82806	76156	NM_001113327	6330503C03Rik| 6530406I18Rik| AV277466	family with sequence similarity 131, member B
15065	Mmp23	1.82021	26561	NM_011985	CA-MMP	matrix metallopeptidase 23
14723	Zfp593	1.82011	68040	NM_024215	3110024A21Rik| AV062409| E130106C14Rik| ZNF593	zinc finger protein 593
6864	Ndrg1	1.81703	17988	NM_008681	CAP43| CMT4D| DRG1| HMSNL| Ndr1| Ndrl| NMSL| PROXY1| RTP| TDD5	N-myc downstream regulated gene 1
21860	B430319G15Rik	1.81608	78575	NR_029474	D530025C14Rik	RIKEN cDNA B430319G15 gene
18887	Tm6sf1	1.81566	107769	NR_111910	AI428514| BC023123| C630016D09Rik	transmembrane 6 superfamily member 1
10452	Pdlim1	1.81523	54132	NM_016861	Clim1| CLP36| mClim1	PDZ and LIM domain 1 (elfin)
10724	C1ql3	1.81471	227580	NM_153155	1110065A22Rik| AI661623| C1ql| C1qtnf13| CTRP13| K100	C1q-like 3
18854	Ttll13	1.81438	269954	NM_177765	1700111A04Rik| 4921538O11| BC024578	tubulin tyrosine ligase-like family, member 13
22761	Gm7173	1.81357	636104	NM_001099307	EG636104	predicted gene 7173
13475	Ptbp2	1.81346	56195	NM_019550	brPTB| nPTB| Ptb2	polypyrimidine tract binding protein 2
14667	Rab42	1.81306	242681	NM_001081651	9530096D07Rik| Rab42-ps	RAB42, member RAS oncogene family
6492	Dgkh	1.81244	380921	NM_001253766	5930402B05Rik| D130015C16| DGK	diacylglycerol kinase, eta
17235	Lmcd1	1.81197	30937	NM_144799	AW455500| AW553074| dyxin	LIM and cysteine-rich domains 1
7373	A330009N23Rik	1.81143	380977	NR_045328		RIKEN cDNA A330009N23 gene
8698	Platr17	1.81142	474160	NR_040470		pluripotency associated transcript 17
9597	Pcdhgb7	1.81126	93704	NM_033579		protocadherin gamma subfamily B, 7
11151	Ermn	1.81101	77767	NM_029972	A330104H05Rik| AI854460| ermin| mKIAA1189	ermin, ERM-like protein
13916	Arhgef39	1.81053	230098	NM_001013377	E130306D19Rik	Rho guanine nucleotide exchange factor (GEF) 39
8844	Gm6034	1.81022	547347	NM_001034909	EG547347| H2-gs14-2	predicted gene 6034
4040	Dnah17	1.80913	69926	NM_001167746	2810003K23Rik| Dnahc17| Dnahcl1| Gm1178| mKIAA3028	dynein, axonemal, heavy chain 17
1218	Mark1	1.80751	226778	NM_145515	AW491150| B930025N23Rik| Emk3| mKIAA1477| mPar-1c| Par-1c	MAP/microtubule affinity regulating kinase 1
8815	Cdsn	1.80713	386463	NM_001008424	AI747712	corneodesmosin
6907	Ly6c2	1.80695	100041546	NM_001099217	Ly-6C.2| Ly-6C2	lymphocyte antigen 6 complex, locus C2
1451	4930519F09Rik	1.80538	114676	NR_033601		RIKEN cDNA 4930519F09 gene
21861	Plod2	1.80375	26432	NM_011961	D530025C14Rik| LH2| Plod-2	procollagen lysine, 2-oxoglutarate 5-dioxygenase 2
11646	Cd44	1.80015	12505	NM_001177785	AU023126| AW121933| AW146109| HERMES| Ly-24| Pgp-1	CD44 antigen
5992	Syt15	1.79943	319508	NM_181529	CHR10SYT| E230025K04Rik| sytXV	synaptotagmin XV
3472	Pctp	1.79842	18559	NM_008796	PC-TP| StarD2	phosphatidylcholine transfer protein
21732	Prtg	1.79751	235472	NM_175485	A230098A12Rik| Igdcc5	protogenin
9766	Apcdd1	1.79716	494504	NM_133237	AB023957| AU041258| Drapc1| EIG180	adenomatosis polyposis coli down-regulated 1
5781	Gm5796	1.79512	545007	NM_001029930	545007	predicted gene 5796
11219	Myo3b	1.79506	329421	NM_177376	A430065P19Rik	myosin IIIB
8971	Cyp39a1	1.79474	56050	NM_001285948	mCYP39A1	cytochrome P450, family 39, subfamily a, polypeptide 1
15537	Atp8a1	1.79391	11980	NM_001284345	AI481521| AI853962| APLT| Atp3a2| AW743152| AW822227| B230107D19Rik| ClassI	ATPase, aminophospholipid transporter (APLT), class I, type 8A, member 1
17665	Bcat1	1.79234	12035	NM_007532	BCATc| Eca39	branched chain aminotransferase 1, cytosolic
13710	Plag1	1.79107	56711	NM_019969		pleiomorphic adenoma gene 1
17010	Sema4f	1.7897	20355	NM_001308374	Sema W	sema domain, immunoglobulin domain (Ig), TM domain, and short cytoplasmic domain
19909	Proz	1.78713	66901	NM_025834	1300015B06Rik	protein Z, vitamin K-dependent plasma glycoprotein
22235	Slc6a20b	1.78665	22599	NM_011731	AA986306| Sit1| Slc6a20| XT3| Xtrp3	solute carrier family 6 (neurotransmitter transporter), member 20B
20225	Galntl6	1.78616	270049	NM_175032	1700021K10Rik| 4930431L04Rik| A830023L05	UDP-N-acetyl-alpha-D-galactosamine:polypeptide N-acetylgalactosaminyltransferase-like 6
21819	Rwdd2a	1.78609	69519	NM_001145969	1700030C20Rik| AI848608| Rwdd2	RWD domain containing 2A
467	Pid1	1.78572	98496	NM_001003948	5033414K04Rik| NYGGF4	phosphotyrosine interaction domain containing 1
19405	Tmc7	1.78513	209760	NM_172476	1700030H01Rik| C230064B05| C630024K23Rik	transmembrane channel-like gene family 7
10138	Fth1	1.78495	14319	NR_073181	FHC| Fth| HFt| MFH	ferritin heavy polypeptide 1
11238	Pdk1	1.78469	228026	NM_172665	B830012B01| D530020C15Rik	pyruvate dehydrogenase kinase, isoenzyme 1
4916	Prl2c3	1.78166	18812	NM_011118	Ghd1| MRP-2| MRP-3| mrp/plf3| Mrpplf3| PLF-2| PLF-3| Plf2| Prl2c4	prolactin family 2, subfamily c, member 3
7946	Nxpe3	1.7783	385658	NM_001134457	Fam55c| Gm1752| Gm611	neurexophilin and PC-esterase domain family, member 3
23195	Siah1b	1.77771	20438	NM_001308385	AA960570| siah-1b| Sinh1b	seven in absentia 1B
3326	C030013C21Rik	1.77615	77417	NR_126552		RIKEN cDNA C030013C21 gene
18891	Sh3gl3	1.77608	20408	NM_017400	EEN-B2| Sh3d2c| Sh3d2c2| SH3P13	SH3-domain GRB2-like 3
18764	Apba2	1.77589	11784	NM_007461	mXllL| X11-like| X11L| XllL	amyloid beta (A4) precursor protein-binding, family A, member 2
2165	Best3	1.77358	382427	NM_001007583	mBest4| Vmd2l3	bestrophin 3
6403	Adam28	1.77241	13522	NR_102399	C130072N01Rik| D430033C21Rik| Dtgn1| eMDCII| MDC-L| MDCL| TECADAM	a disintegrin and metallopeptidase domain 28
20893	Dbndd1	1.77196	72185	NM_001170976	2810427I04Rik| D8Ertd590e	dysbindin (dystrobrevin binding protein 1) domain containing 1
9416	Dsg2	1.77149	13511	NM_007883	AA408168| D18Ertd293e	desmoglein 2
4848	Tmem121	1.76972	69195	NM_153776	2410008J05Rik| Hole	transmembrane protein 121
19206	Usp17la	1.76879	13531	NM_007887	Dub1| USP17-A	ubiquitin specific peptidase 17-like A
10524	Sema4g	1.76391	26456	NM_011976	AI507908| AW554132	sema domain, immunoglobulin domain (Ig), transmembrane domain (TM) and short cytoplasmic domain, (semaphorin) 4G
2582	Stc2	1.76308	20856	NM_011491	AW125853| mustc2| Stc2l	stanniocalcin 2
13680	AI606473	1.76157	99686	NR_040387		expressed sequence AI606473
11987	Oxt	1.76049	18429	NM_011025	OT| Oxy	oxytocin
12679	Tnfsf10	1.75999	22035	NM_009425	A330042I21Rik| AI448571| APO-2L| Ly81| TL2| Tnlg6a| Trail	tumor necrosis factor (ligand) superfamily, member 10
4564	Rnf113a2	1.75952	66381	NM_025525	2310020H19Rik| AI426758| Rnf113a	ring finger protein 113A2
4246	Rnaseh1	1.75906	19819	NM_011275		ribonuclease H1
1781	Lrrc3	1.7578	237387	NM_145152	1300011L04Rik| C21orf102	leucine rich repeat containing 3
6790	Slc30a8	1.7576	239436	NM_172816	C820002P14Rik| ZnT-8| ZnT8	solute carrier family 30 (zinc transporter), member 8
10581	Cfap43	1.75739	100048534	NM_027559	4632415N18Rik| 4930428C11Rik| 4930463G05Rik| AI429486| D19Ertd652e| Wdr96	cilia and flagella associated protein 43
8319	Has1	1.75729	15116	NM_008215	HAS	hyaluronan synthase1
10480	4933411K16Rik	1.75681	66765	NM_025752		RIKEN cDNA 4933411K16 gene
32	Cpa6	1.7558	329093	NM_001289497	9030616D13Rik	carboxypeptidase A6
19768	Brsk2	1.75509	75770	NM_029426	4833424K13Rik| SAD-A| SADA	BR serine/threonine kinase 2
4863	Sp4	1.75468	20688	NM_009239	5730497N03Rik| HF-1b| HF1-b	trans-acting transcription factor 4
856	Ptgs2	1.75384	19225	NM_011198	Cox-2| COX2| gripghs| PES-2| PGHS-2| Pghs2| PHS II| PHS-2| TIS10	prostaglandin-endoperoxide synthase 2
12085	Slc24a3	1.75361	94249	NM_053195	NCKX3	solute carrier family 24 (sodium/potassium/calcium exchanger), member 3
9134	Catsperd	1.75352	106757	NM_175350	4921529N20Rik| 4933402B14Rik| 619718| AW045609| Gm6095| Tmem146	catsper channel auxiliary subunit delta
4832	Zbtb42	1.75296	382639	NM_001100460	EG382639| Gm5188| simiRP58	zinc finger and BTB domain containing 42
23205	Fancb	1.75289	237211	NM_175027	BC022692	Fanconi anemia, complementation group B
7379	Krt80	1.75262	74127	NM_028770	1200016G03Rik| 2310041I20Rik| Kb20	keratin 80
17529	Klra8	1.75223	16639	NM_001101620	Cmv-1| Cmv1| Ly49h| Ly49u<129>	killer cell lectin-like receptor, subfamily A, member 8
6048	Gpr137c	1.74999	70713	NM_027518	6330416L11Rik| Gm908| TM7SF1L2	G protein-coupled receptor 137C
6392	Gm6878	1.74825	628416	NM_001037931	EG628416	predicted gene 6878
14863	B330016D10Rik	1.74452	320456	NR_030695		RIKEN cDNA B330016D10 gene
12199	2500004C02Rik	1.74386	72326	NR_040318	RP23-192G18.7	RIKEN cDNA 2500004C02 gene
18945	Tyr	1.74375	22173	NM_011661	albino| c| Oca1| skc35	tyrosinase
1862	Gamt	1.74348	14431	NM_010255	AA571402| Spintz1	guanidinoacetate methyltransferase
21180	Kcnj5	1.74236	16521	NM_010605	GIRK4| Kir3.4	potassium inwardly-rectifying channel, subfamily J, member 5
13548	Dkk2	1.74223	56811	NM_020265		dickkopf WNT signaling pathway inhibitor 2
15484	Rbpj	1.74206	19664	NM_001080928	AI843960| CBF1| Igkjrb| Igkrsbp| RBP-J| RBP-J kappa| RBP-Jkappa| RBPjk| Rbpsuh	recombination signal binding protein for immunoglobulin kappa J region
20459	Podnl1	1.74073	244550	NM_001013384	5832418A03Rik| Gm506	podocan-like 1
18475	Zfp939	1.74062	233147	NM_001243021	9430025M13Rik	zinc finger protein 939
7208	Adm2	1.74017	223780	NM_182928	Am2| IMD| Imdn	adrenomedullin 2
9609	Pcdh1	1.73922	75599	NM_029357	2010005A06Rik| AI585920	protocadherin 1
14931	Gm13034	1.73707	627585	NR_030771	OTTMUSG00000010105	predicted gene 13034
19908	F10	1.73682	14058	NM_001242368	Cf10| fX	coagulation factor X
6703	Snord123	1.73676	66835	NR_028575		small nucleolar RNA, C/D box 123
12919	Golim4	1.73586	73124	NM_001291069	3110027H23Rik| GIMPC| Golph4| GPP130| P138	golgi integral membrane protein 4
10619	Ccdc186	1.72995	213993	NM_170757	1810028B20Rik| A630007B06Rik| AI159700| Otg1	coiled-coil domain containing 186
9743	Csf1r	1.72896	12978	NM_001037859	AI323359| CD115| CSF-1R| Csfmr| Fim-2| Fim2| Fms| M-CSF-R| M-CSFR	colony stimulating factor 1 receptor
2199	9230105E05Rik	1.72813	320626	NR_040626		RIKEN cDNA 9230105E05 gene
17074	1700019G17Rik	1.72805		NM_029331
20505	Mylk3	1.72663	213435	NM_175441	D830007F02Rik| MLCK	myosin light chain kinase 3
15183	Speer4cos	1.72552	75858	NR_001585	4930568L21Rik| SPEER-7| Speer7-ps| Speer7-ps1	spermatogenesis associated glutamate (E)-rich protein 4C, opposite strand transcript
22831	Eda	1.72528	13607	NM_001177942	Ed1| Eda-A1| Eda-A2| EDA1| HED| Ta| tabby| Tnlg7c| XLHED	ectodysplasin-A
14811	Pla2g5	1.72387	18784	NM_001122954	PLA2| sPLA2	phospholipase A2, group V
9599	Pcdhgb8	1.72368	93705	NM_033580		protocadherin gamma subfamily B, 8
18789	Igf1r	1.72331	16001	NM_010513	A330103N21Rik| CD221| D930020L01| hyft| IGF-1R	insulin-like growth factor I receptor
2250	Arhgap9	1.72202	216445	NM_001285785	AU043488	Rho GTPase activating protein 9
4223	9030624G23Rik	1.72077	66808	NM_001256489		RIKEN cDNA 9030624G23 gene
9913	Lrp5	1.71933	16973	NM_008513	BMND1| HBM| LR3| LRP7| mKIAA4142| OPPG	low density lipoprotein receptor-related protein 5
23110	Wnk3	1.71827	279561	NM_001271678	Prkwnk3| Wnk3-ps	WNK lysine deficient protein kinase 3
4879	Net1	1.71819	56349	NM_019671	mNET1| Net1a	neuroepithelial cell transforming gene 1
1459	Trmt11	1.71616	73681	NM_028604	2410075D05Rik| 3110045I18Rik| AW213713	tRNA methyltransferase 11
3980	Itgb4	1.71499	192897	NM_001005608	AA407042| C230078O20| CD104	integrin beta 4
5486	Srd5a1	1.71419	78925	NM_175283	0610031P22Rik| 4930435F02Rik| S5AR 1| Srd5a-1	steroid 5 alpha-reductase 1
9588	Pcdhga5	1.71125	93713	NM_033588		protocadherin gamma subfamily A, 5
19752	Pidd1	1.70835	57913	NM_022654	1200011D09Rik| AU042446| Lrdd| Pidd	p53 induced death domain protein 1
16040	Tctn1	1.70774	654470	NM_001039153	G730031O11Rik| Tect1	tectonic family member 1
6624	Dab2	1.70669	13132	NM_001008702	5730435J12Rik| AA960054| AI957090| D15Wsu122e| D630005B22Rik| Doc-2| Doc2| p96	disabled 2, mitogen-responsive phosphoprotein
346	Map2	1.70501	17756	NM_008632	G1-397-34| MAP-2| Mtap-2| Mtap2| repro4	microtubule-associated protein 2
5152	Serpinb1b	1.70427	282663	NM_173052	6330533H24Rik| EIB| ovalbumin| Serpin1b1	serine (or cysteine) peptidase inhibitor, clade B, member 1b
8012	Arl13b	1.70413	68146	NM_026577	A530097K21Rik| A930014M17Rik| Arl2l1| C530009C10Rik| hnn	ADP-ribosylation factor-like 13B
19068	Xndc1	1.70358	102443350	NM_001286689	Xndr	Xrcc1 N-terminal domain containing 1
22732	Gab3	1.70352	210710	NM_181584	5930433H21Rik	growth factor receptor bound protein 2-associated protein 3
2104	Tmtc2	1.70213	278279	NM_177368	8430438D04Rik| D330034A10Rik	transmembrane and tetratricopeptide repeat containing 2
13439	Ntng1	1.70184	80883	NM_001163350	A930010C08Rik| AI853992| Lmnt1	netrin G1
19554	Tmem265	1.70004	105180375	NM_001304267		transmembrane protein 265
14259	Raver2	1.69955	242570	NM_183024	A430091O22Rik	ribonucleoprotein, PTB-binding 2
15610	Epha5	1.69919	13839	NM_007937	AI854630| AW125296| bsk| Cek7| Ehk1| Els1| Hek7| Rek7	Eph receptor A5
4440	Gpr135	1.69817	238252	NM_181752	PAFR	G protein-coupled receptor 135
7958	Tmem45a	1.69755	56277	NM_019631	C630002M10Rik| M32486| p19.5	transmembrane protein 45a
9847	Gm10532	1.69705	100038353	NR_045879	ENSMUSG00000073534	predicted gene 10532
11314	Fam171b	1.69527	241520	NM_175514	D430039N05Rik	family with sequence similarity 171, member B
19231	Gm5901	1.69514	100503879	NM_001195727	EG545989	predicted gene 5901
20589	Cngb1	1.69474	333329	NM_001195413	Cngb1b| Gm1959	cyclic nucleotide gated channel beta 1
23122	Gpr173	1.69441	70771	NM_027543	3230401K02Rik| Sreb3	G-protein coupled receptor 173
6049	Ero1l	1.69402	50527	NM_015774	ERO1-L| Ero1a	ERO1-like (S. cerevisiae)
19676	6430531B16Rik	1.69402	381933	NM_001033465	Gm1093	RIKEN cDNA 6430531B16 gene
15825	Pde6b	1.69389	18587	NM_008806	Pdeb| r| rd| rd-1| rd1| rd10	phosphodiesterase 6B, cGMP, rod receptor, beta polypeptide
1402	C920009B18Rik	1.69372	606736	NR_015465		RIKEN cDNA C920009B18 gene
6206	Slc22a17	1.69353	59049	NM_021551	1700094C23Rik| 24p3R| AU041908| AW555662| Boct| BOIT| mBOCT	solute carrier family 22 (organic cation transporter), member 17
19031	Pgm2l1	1.69271	70974	NM_027629	4931406N15Rik| AI553438| BM32A	phosphoglucomutase 2-like 1
1869	Adamtsl5	1.69268	66548	NR_104340	2010109H09Rik| Thsd6	ADAMTS-like 5
16449	Gm3704	1.69113	100042166	NR_131166	100042166	predicted gene 3704
10315	Ptar1	1.69054	72351	NM_028208	1700084D09Rik| 2010013L17Rik| 4930428J16Rik| AI449677	protein prenyltransferase alpha subunit repeat containing 1
11911	Fgf7	1.69029	14178	NM_008008	Kgf	fibroblast growth factor 7
15271	Dpp6	1.68997	13483	NM_010075	B930011P16Rik| D5Buc3| D5Buc4| D5Buc5| DPP VI| Dpp-6| Gm1377| In(5)6H-p| Peplb| Rw	dipeptidylpeptidase 6
2255	Stac3	1.68978	237611	NM_177707	9830125E18	SH3 and cysteine rich domain 3
22294	Ccdc120	1.68945	54648	NM_207202	AA030924| DXImx50e| Jm11| Sfc25	coiled-coil domain containing 120
15280	9530036O11Rik	1.68741	654796	NR_015562		RIKEN cDNA 9530036O11Rik
9598	Pcdhga11	1.6872	93723	NM_033594		protocadherin gamma subfamily A, 11
7302	Rnd1	1.68653	223881	NM_172612	A830014L09Rik| Arhs	Rho family GTPase 1
21609	Thsd4	1.68616	207596	NM_001040426	ADAMTSL-6| Adamtsl4| ADAMTSL6| AI585901| B230114P05Rik	thrombospondin, type I, domain containing 4
6683	Fam134b	1.6861	66270	NM_001034851	1810015C04Rik| AU015349	family with sequence similarity 134, member B
11049	Ttll11	1.685	74410	NM_029774	4932702F08Rik| 4933424A20Rik| AU043211| D2Ertd624e	tubulin tyrosine ligase-like family, member 11
4066	Rptoros	1.68477	319454	NR_045313	A430071A18Rik	regulatory associated protein of MTOR, complex 1, opposite strand
21225	Ccdc15	1.68256	245902	NM_001081429	A630039F14Rik| D030074L19	coiled-coil domain containing 15
3147	Atp2a3	1.68222	53313	NM_001163337	Serca3| SERCA3b	ATPase, Ca++ transporting, ubiquitous
15156	Abcb1a	1.68212	18671	NM_011076	Abcb4| Evi32| mdr-3| Mdr1a| Mdr3| P-gp| Pgp| Pgy-3| Pgy3	ATP-binding cassette, sub-family B (MDR/TAP), member 1A
2689	Btnl9	1.68189	237754	NM_172793	B430208I01| Btn3| D330012D11Rik	butyrophilin-like 9
18993	Pak1	1.68148	18479	NM_011035	AW045634| PAK-1| Paka	p21 protein (Cdc42/Rac)-activated kinase 1
14798	Sh2d5	1.68106	230863	NM_001099631	BC036961	SH2 domain containing 5
8970	Slc25a27	1.67724	74011	NM_028711	3632410G24Rik| 9430092A03Rik| D530043E16Rik| Ucp4	solute carrier family 25, member 27
1325	Ust	1.67723	338362	NM_177387	D930010O20Rik| UA2OST	uronyl-2-sulfotransferase
882	E330020D12Rik	1.67602	626058	NR_033736	EG626058| F430003O07Rik| Gm6648	Riken cDNA E330020D12 gene
382	Cxcr2	1.67501	12765	NM_009909	CD128| CDw128| Cmkar2| Gpcr16| IL-8rb| IL-8Rh| IL8RA| Il8rb| mIL-8RH	chemokine (C-X-C motif) receptor 2
15160	Tmem243	1.67426	652925	NM_001081029	4930420K17Rik| E030031F02Rik	transmembrane protein 243, mitochondrial
16578	Opn1sw	1.67391	12057	NM_007538	AW551857| Bcp	opsin 1 (cone pigments), short-wave-sensitive (color blindness, tritan)
23179	Gja6	1.67289	414089	NM_001001496	A530015O12Rik| Cnx33| Cx33| Gja-6	gap junction protein, alpha 6
4371	Mipol1	1.67239	73490	NM_001164370	1700081O04Rik| 6030439O22Rik| AU021838| AW536152| D12Ertd19e	mirror-image polydactyly 1
4650	Spata7	1.67194	104871	NM_178914	AI661438| B230306G18Rik| HSD3	spermatogenesis associated 7
5565	Vcan	1.67189	13003	NM_001081249	5430420N07Rik| 9430051N09| Cspg2| DPEAAE| hdf| NG2| PG-M| PG-M(V0)| PG-M(V1)	versican
2675	Trim7	1.67177	94089	NM_053166	AI790312	tripartite motif-containing 7
15674	Cxcl5	1.67173	20311	NM_009141	AMCF-II| Cxcl6| ENA-78| GCP-2| LIX| Scyb5| Scyb6	chemokine (C-X-C motif) ligand 5
20105	Hmgb1-rs17	1.67134	628431	NR_033589	Hmg1-rs17	high mobility group box 1, related sequence 17
2931	Grap	1.67095	71520	NM_027817	8430435N19Rik| BB233594	GRB2-related adaptor protein
1152	Akt3	1.6683	23797	NM_011785	AI851531| D930002M15Rik| Nmf350	thymoma viral proto-oncogene 3
2022	Apaf1	1.66804	11783	NM_001042558	6230400I06Rik| Apaf-1| Apaf1l| fog| mKIAA0413	apoptotic peptidase activating factor 1
11740	Olfr1318	1.66761	258022	NM_001011802	MOR245-16	olfactory receptor 1318
2643	Il12b	1.66748	16160	NM_001303244	Il-12b| Il-12p40| Il12p40| p40	interleukin 12b
12153	Angpt4	1.66711	11602	NM_009641	Agpt4| Ang3	angiopoietin 4
10791	Cacna1b	1.66706	12287	NM_001042528	alpha(1B)| AW050276| AW060892| AW822256| Cav2.2| Cchn1a	calcium channel, voltage-dependent, N type, alpha 1B subunit
21716	Adam10	1.667	11487	NM_007399	1700031C13Rik| kuz| kuzbanian| MADM	a disintegrin and metallopeptidase domain 10
17532	Klra7	1.6662	16638	NM_014194	LGL-1| Ly-49G.1| Ly-49G.2| Ly-49G.3| Ly49g| Ly49G.4| Ly49g1| Ly49g2	killer cell lectin-like receptor, subfamily A, member 7
23176	Ppef1	1.66551	237178	NM_011147	PPEF-1	protein phosphatase with EF hand calcium-binding domain 1
17324	Cacna1c	1.66533	12288	NM_009781	Cav1.2| Cchl1a1| D930026N18Rik| MBC| MELC-CC	calcium channel, voltage-dependent, L type, alpha 1C subunit
9979	Cd248	1.66458	70445	NM_054042	2610111G01Rik| AI842296| Cd164l1| Tem1	CD248 antigen, endosialin
21715	Fam63b	1.66124	235461	NM_172772	AI465301| B230380D07Rik| mKIAA1164	family with sequence similarity 63, member B
14494	Hivep3	1.66005	16656	NM_010657	2900056N03Rik| A130075N07| AI848000| E030045D18Rik| KBP-1| KBP1| Krc| Rc| Schnurri-3| Shn3| Zas3	human immunodeficiency virus type I enhancer binding protein 3
16992	6330415B21Rik	1.65978	70753	NR_045141		RIKEN cDNA 6330415B21 gene
9079	Btg3	1.65959	12228	NM_001297747	ANA| tob5	B cell translocation gene 3
16671	Braf	1.65864	109880	NM_139294	9930012E13Rik| AA120551| AA387315| AA473386| B-raf| Braf-2| Braf2| C230098H17| C87398| D6Ertd631e	Braf transforming gene
15399	Psapl1	1.65832	76943	NM_175249	2310020A21Rik	prosaposin-like 1
15146	Steap2	1.65806	74051	NM_001285471	4921538B17Rik| AI930049| AW045895| IPCA-1| IPCA1| PCANAP1| STAMP1| STMP	six transmembrane epithelial antigen of prostate 2
21789	Cd109	1.65733	235505	NM_153098	9930012E15Rik| AI480638| GARP	CD109 antigen
6610	A630020A06	1.65726	328489	NR_045740		uncharacterized A630020A06
12630	Slc10a5	1.65549	241877	NM_001010834	Gm405| mP5	solute carrier family 10 (sodium/bile acid cotransporter family), member 5
21378	Abcg4	1.65516	192663	NM_138955	6430517O04Rik	ATP-binding cassette, sub-family G (WHITE), member 4
15850	Gm15446	1.65264	100642166	NR_040366	OTTMUSG00000022004	predicted gene 15446
9661	Fem1c	1.65181	240263	NM_173423	2610312A07Rik| 3632443A22Rik| AI646567	fem-1 homolog c (C.elegans)
6713	9430069I07Rik	1.65098	77358	NM_001256161		RIKEN cDNA 9430069I07 gene
5744	Isl1	1.65056	16392	NM_021459		ISL1 transcription factor, LIM/homeodomain
14672	Snord99	1.64908	100217437	NR_028537	MBII-420	small nucleolar RNA, C/D box 99
19365	Galnt18	1.64847	233733	NM_173739	2900011G21Rik| BC024988| Galntl4	UDP-N-acetyl-alpha-D-galactosamine:polypeptide N-acetylgalactosaminyltransferase 18
15000	Tnfrsf9	1.64844	21942	NM_001077508	4-1BB| A930040I11Rik| AA408498| AI325004| Cd137| CDw137| ILA| Ly63	tumor necrosis factor receptor superfamily, member 9
20092	Unc5d	1.64782	210801	NM_153135	D930029E11Rik| mKIAA1777| Unc5h4	unc-5 netrin receptor D
2167	Cct2	1.64636	12461	NM_007636	Cctb	chaperonin containing Tcp1, subunit 2 (beta)
1318	BC020402	1.64537	407824	NR_033219		cDNA sequence BC020402
21841	Trim43b	1.64529	666747	NM_001170884	EG666747| Gm8269	tripartite motif-containing 43B
16916	Ccser1	1.64504	232035	NM_001164316	6230405M12Rik| C130092O11Rik| Fam190a	coiled-coil serine rich 1
23156	Prdx4	1.64346	53381	NM_016764	AOE372| Prx-iv| Prx4| TRANK	peroxiredoxin 4
16442	Brca2	1.64324	12190	NM_009765	Fancd1| RAB163	breast cancer 2, early onset
19965	6820431F20Rik	1.643	547150	NR_030708		RIKEN cDNA 6820431F20 gene
10341	Rfx3	1.64266	19726	NM_001166414	C230093O12Rik| MRFX3	regulatory factor X, 3 (influences HLA class II expression)
11803	Gm14137	1.64056	623781	NM_001039223	OTTMUSG00000015762	predicted gene 14137
3283	Foxn1	1.6404	15218	NM_001277290	D11Bhm185e| Fkh19| HFH-11| Hfh11| nu| nude| Whn	forkhead box N1
1025	3110045C21Rik	1.64026	67303	NR_040438	AI838577	RIKEN cDNA 3110045C21 gene
943	Cenpl	1.64026	70454	NM_001159930	2610300B10Rik| AW121806| AW550697| CENP-L	centromere protein L
4290	Ahr	1.63954	11622	NM_013464	Ah| Ahh| Ahre| bHLHe76| In	aryl-hydrocarbon receptor
13546	Sgms2	1.63904	74442	NM_028943	4933405A16Rik| 5133401H06Rik| AI854299	sphingomyelin synthase 2
14190	Gm13283	1.63841	545645	NM_001085531	EG545645| OTTMUSG00000011280	predicted gene 13283
10296	Rorb	1.63795	225998	NM_001289921	hstp| Nr1f2| Rorbeta| RZR-beta| RZRB	RAR-related orphan receptor beta
19967	2610005L07Rik	1.63767	381598	NR_028428	2810038F24Rik| 6720476A01Rik	RIKEN cDNA 2610005L07 gene
4390	Klhl28	1.63674	66689	NM_025707	2810440N09Rik| 4122402F11Rik| 4931401E10Rik| Btbd5	kelch-like 28
14753	Ifnlr1	1.6367	242700	NM_174851	CRF2-12| Il28ra	interferon lambda receptor 1
9879	Nfatc1	1.63563	18018	NM_198429	2210017P03Rik| AI449492| AV076380| NF-ATc| NFAT2| NFATc| Nfatcb	nuclear factor of activated T cells, cytoplasmic, calcineurin dependent 1
3014	Tmem107	1.63269	66910	NM_025838	1110004B13Rik| 2810049P21Rik	transmembrane protein 107
22030	Amt	1.63241	434437	NM_001013814	EG434437	aminomethyltransferase
12780	Pabpc4l	1.63196	241989	NM_001101479	C330050A14Rik| EG241989	poly(A) binding protein, cytoplasmic 4-like
1854	Dos	1.63165		NM_001195268
6865	St3gal1	1.63152	20442	NM_009177	5330418N22Rik| AI467004| Siat4| Siat4a| St3gal-1| ST3GalI	ST3 beta-galactoside alpha-2,3-sialyltransferase 1
10639	Hspa12a	1.63116	73442	NM_175199	1700063D12Rik| AI118035| AI840429| AW048913| AW556406| D5Mgi40| Gm19925| mKIAA0417	heat shock protein 12A
10746	Skida1	1.63043	72668	NM_028317	2810030E01Rik| 5730507N06Rik| BB088113	SKI/DACH domain containing 1
4395	Mis18bp1	1.63015	217653	NM_172578	6720403H11| C79407| Knl2| mKIAA1903	MIS18 binding protein 1
2313	Pmel	1.62917	20431	NM_021882	D10H12S53E| D12S53Eh| gp100| gp87| Pmel17| Si| Silv	premelanosome protein
14308	Hspb11	1.6288	72938	NM_028394	2900042B11Rik| IFT25	heat shock protein family B (small), member 11
15465	5730480H06Rik	1.62724	70592	NR_045500		RIKEN cDNA 5730480H06 gene
18163	Zfp112	1.62659	57745	NM_021307	Znf112| Znf228	zinc finger protein 112
1682	Rtkn2	1.62508	170799	NM_001081346	B130039D23Rik| Mbf| Plekhk1	rhotekin 2
9378	1010001N08Rik	1.62415	68434	NR_105023		RIKEN cDNA 1010001N08 gene
9773	Onecut2	1.6224	225631	NM_194268	C730009D12| OC-2| Oc2	one cut domain, family member 2
7868	Cd80	1.62183	12519	NM_009855	B71| Cd28l| Ly-53| Ly53| MIC17| TSA1	CD80 antigen
19848	Fcer2a	1.62057	14128	NM_001253743	CD23| Fce2| Fcer2| Ly-42	Fc receptor, IgE, low affinity II, alpha polypeptide
1403	Raet1d	1.61995	56554	NM_020030	RAE-1delta	retinoic acid early transcript delta
7509	AU021092	1.61988	239691	NM_001033220		expressed sequence AU021092
20838	Foxc2	1.61886	14234	NM_013519	Fkh14| Hfhbf3| MFH-1| Mfh1	forkhead box C2
2268	Rdh1	1.61828	107605	NM_080436		retinol dehydrogenase 1 (all trans)
3374	E230016K23Rik	1.61759	100504464	NR_036452		RIKEN cDNA E230016K23 gene
4074	2810410L24Rik	1.61688	100042332	NR_030682		RIKEN cDNA 2810410L24 gene
13471	Lppr4	1.61592		NM_177664
15281	Rnf32	1.61572	56874	NM_021470	1700009J01Rik| 2700025B22Rik| 4930542N22Rik| Lmbr2	ring finger protein 32
23190	Grpr	1.61566	14829	NM_008177	GRP-R	gastrin releasing peptide receptor
10054	Pygm	1.61458	19309	NM_011224	AI115133| PG	muscle glycogen phosphorylase
20072	1700047A11Rik	1.61457	76604	NR_110583	4930554C15Rik	RIKEN cDNA 1700047A11 gene
5321	Tspan17	1.61455	74257	NM_028841	2210021G21Rik| AI047581| Fbxo23| Tm4sf17	tetraspanin 17
10406	Ankrd1	1.6145	107765	NM_013468	Alrp| CARP| Crap| MARP1	ankyrin repeat domain 1 (cardiac muscle)
15767	Arhgap24	1.61429	231532	NM_029270	0610025G21Rik	Rho GTPase activating protein 24
14030	Klf4	1.61409	16600	NM_010637	EZF| Gklf| Zie	Kruppel-like factor 4 (gut)
6373	Esco2	1.61361	71988	NM_028039	2410004I17Rik| D030072L07Rik	establishment of sister chromatid cohesion N-acetyltransferase 2
23047	Tbc1d8b	1.61257	245638	NM_001081499	4921505D17Rik| 9030605E16Rik	TBC1 domain family, member 8B
10415	A330032B11Rik	1.61217	319931	NR_045329		RIKEN cDNA A330032B11 gene
9275	C230072F16Rik	1.61194	320784	NR_131127		RIKEN cDNA C230072F16 gene
12612	1700010I02Rik	1.61178	75476	NR_040587		RIKEN cDNA 1700010I02 gene
7739	Ostn	1.61169	239790	NM_198112	Ostc	osteocrin
8660	Cyp4f37	1.61153	677156	NM_001100187	677156| Gm9705	cytochrome P450, family 4, subfamily f, polypeptide 37
358	Bard1	1.61117	12021	NM_007525	ENSMUSG00000060893| ENSMUSG00000073653	BRCA1 associated RING domain 1
7721	Masp1	1.61088	17174	NM_008555	AW048060| CCPII| Crarf| Masp1/3	mannan-binding lectin serine peptidase 1
4206	Pqlc3	1.61077	217430	NM_172574	C78076| E030024M05Rik	PQ loop repeat containing
23175	Phka2	1.61006	110094	NM_001177879	6330505C01Rik| D330034O08| Phk	phosphorylase kinase alpha 2
18465	Tshz3	1.60939	243931	NM_172298	A630038G13Rik| mKIAA1474| teashirt3| Tsh3| Zfp537	teashirt zinc finger family member 3
14353	Spata6	1.60928	67946	NM_026470	1700062C23Rik| AI790763| Hash| KRP| Mash	spermatogenesis associated 6
21818	Pgm3	1.60916	109785	NM_028352	2810473H05Rik| Agm1| BB187688| C77933| PAGM| Pgm-3	phosphoglucomutase 3
1333	Grm1	1.6086	14816	NM_016976	4930455H15Rik| ENSMUSG00000075319| Gm10828| Gprc1a| mGluR1| nmf373| rcw| wobl	glutamate receptor, metabotropic 1
17831	Peg3	1.60842	18616	NM_008817	AL022617| ASF-1| End4| Gcap4| mKIAA0287| Pw1| Zfp102	paternally expressed 3
14095	Wdr31	1.6076	71354	NM_001290522	5430402I10Rik| spWD	WD repeat domain 31
9711	Prrc1	1.60704	73137	NM_028447	1190002C06Rik| 2310058D16Rik| 3110038B19Rik| 9430085A19Rik	proline-rich coiled-coil 1
1004	Ildr2	1.60702	100039795	NM_001164528	2810478N18Rik| 3110063L10Rik| AI852300| D1Ertd471e| Dbsm1| ENSMUSG00000040612| Ll	immunoglobulin-like domain containing receptor 2
21826	Mrap2	1.60593	244958	NM_001101482	BB633055	melanocortin 2 receptor accessory protein 2
11811	Chac1	1.60519	69065	NM_026929	1810008K03Rik	ChaC, cation transport regulator 1
18052	Pvrl2	1.60487		NM_008990
322	Adam23	1.60446	23792	NM_011780	AW046396| MDC3	a disintegrin and metallopeptidase domain 23
5459	Zfp595	1.604	218314	NM_177622	A230042K10Rik| Rslcan23	zinc finger protein 595
10299	E030003E18Rik	1.60318	320092	NR_015502	1700127G21Rik	RIKEN cDNA E030003E18 gene
6368	Pnoc	1.60247	18155	NM_010932	N/OFQ| Npnc1| OFQ/N	prepronociceptin
15889	Asphd2	1.60247	72898	NM_028386	2900006N09Rik| 9230106G13Rik	aspartate beta-hydroxylase domain containing 2
6422	9930012K11Rik	1.60178	268759	NM_001004155		RIKEN cDNA 9930012K11 gene
11167	Ly75	1.60025	17076	NM_013825	CD205| DEC-205| DEC205	lymphocyte antigen 75
7140	1700001L05Rik	1.6002	69291	NR_027980		RIKEN cDNA 1700001L05 gene
19026	Rnf169	1.59982	108937	NM_175388	2900057K09Rik	ring finger protein 169
7804	Heg1	1.59912	77446	NM_175256	4632417D23Rik| 5530401I02Rik| 9530025L16Rik| BC038614| Gm629| OTTMUSG00000027315	heart development protein with EGF-like domains 1
13779	Nkain3	1.59859	269513	NM_001290410	C530048M05| E130310K16Rik	Na+/K+ transporting ATPase interacting 3
9476	Epb4.1l4aos	1.59799		NR_038152
9584	Pcdhga3	1.59795	93711	NM_033586		protocadherin gamma subfamily A, 3
3977	Smim5	1.59747	66528	NM_183259	2210020M01Rik	small integral membrane protein 5
6128	Pnp	1.59732	18950	NM_013632	AL024301| AU015798| Np| Np-1| Np-2| Pnp1	purine-nucleoside phosphorylase
16846	Prr15	1.59697	78004	NM_030024	E130201N16Rik| G90	proline rich 15
4269	Cog5	1.5937	238123	NM_001163126	5430405C01Rik| C87247| D18362| GOLTC1| GTC90	component of oligomeric golgi complex 5
17531	Klra9	1.59361	16640	NM_010651	Ly49I| LY49I1	killer cell lectin-like receptor subfamily A, member 9
1606	P4ha1	1.59259	18451	NM_011030	AL022634| P4ha	procollagen-proline, 2-oxoglutarate 4-dioxygenase (proline 4-hydroxylase), alpha 1 polypeptide
8296	Gm3448	1.59218	100041639	NM_001123367	100041639	predicted gene 3448
15127	1700109H08Rik	1.59075	77036	NM_029843		RIKEN cDNA 1700109H08 gene
22347	Sytl5	1.58972	236643	NM_001290728	ENSMUSG00000054453| slp5	synaptotagmin-like 5
6921	Tigd5	1.58958	105734	NM_178646	AA409802| AA409995| AI666797	tigger transposable element derived 5
16521	Tes	1.58799	21753	NM_207176	D6Ertd352e| Tes1| Tes2| TESS| testin2	testis derived transcript
6906	Ly6c1	1.58756	17067	NM_001252056	AA682074| AA959465| Ly-6C| Ly-6C1| Ly6c	lymphocyte antigen 6 complex, locus C1
4934	Inhba	1.5874	16323	NM_008380		inhibin beta-A
12896	Ift80	1.5871	68259	NM_026641	4921524P20Rik| mKIAA1374| Wdr56	intraflagellar transport 80
9576	Pcdhb19	1.58472	93890	NM_053144	Pcdhb11| PcdhbS	protocadherin beta 19
22972	Nox1	1.58435	237038	NM_172203	GP91-2| MOX1| NOH-1| NOH1| Nox-1| NOX1a| NOX1alpha	NADPH oxidase 1
4913	Ero1lb	1.58322	67475	NM_026184	1300013B24Rik| 1700065B09Rik| AI447560| ero1-beta| Ero1b	ERO1-like beta (S. cerevisiae)
10644	Slc18a2	1.58258	214084	NM_172523	1110037L13Rik| 9330105E13| Vmat2	solute carrier family 18 (vesicular monoamine), member 2
17923	Cabp5	1.58242	29865	NM_013877		calcium binding protein 5
18372	Nphs1	1.58215	54631	NM_019459	nephrin| NephrinB	nephrosis 1, nephrin
8225	Rps6ka2	1.58215	20112	NM_011299	90kDa| D17Wsu134e| p90rsk| pp90rsk| Rps6ka-rs1| Rsk3	ribosomal protein S6 kinase, polypeptide 2
13867	Enho	1.58207	69638	NM_027147	1110065P19Rik| 2310040A07Rik	energy homeostasis associated
22002	Hyal1	1.58181	15586	NM_008317	Hya1| Hyal-1	hyaluronoglucosaminidase 1
3149	Camkk1	1.57952	55984	NM_018883	AI846603| Camkk| CaMKKalpha	calcium/calmodulin-dependent protein kinase kinase 1, alpha
18753	Peg12	1.57914	27412	NM_013788	Frat3	paternally expressed 12
7363	Bin2	1.57913	668218	NM_001270537		bridging integrator 2
20222	Hmgb2	1.57815	97165	NM_008252	C80539| HMG-2| Hmg2	high mobility group box 2
19025	Xrra1	1.57625	446101	NM_001164258	AI449753	X-ray radiation resistance associated 1
2240	Slc26a10	1.57578	216441	NM_177615	C78409| D630010I07	solute carrier family 26, member 10
4178	Osr1	1.57421	23967	NM_011859	Odd1| Osr	odd-skipped related 1 (Drosophila)
11692	Bdnf	1.57389	12064	NM_007540		brain derived neurotrophic factor
12559	Col9a3	1.5733	12841	NM_009936	AV006866	collagen, type IX, alpha 3
9625	Prelid2	1.57307	77619	NM_029942	1700003A01Rik| C330008K14Rik	PRELI domain containing 2
9888	4930592I03Rik	1.57285	75853	NR_033307		RIKEN cDNA 4930592I03 gene
8511	Ccdc78	1.57172	381077	NM_001165929	Gm938| Gm950	coiled-coil domain containing 78
18749	A330076H08Rik	1.57163	320026	NR_015599	Mirh1	RIKEN cDNA A330076H08 gene
11752	Fmn1	1.57154	14260	NM_010230	Fmn| ld	formin 1
7228	Cpne8	1.5706	66871	NM_025815	1200003E11Rik| 1500031E20Rik	copine VIII
7949	Zbtb11os1	1.57015	66391	NR_027965	2310061J03Rik	zinc finger and BTB domain containing 11, opposite strand 1
12884	Shox2	1.56942	20429	NM_001302358	6330543G17Rik| OG12| Og12x| Prx3| SHOT	short stature homeobox 2
3935	Cd300a	1.56903	217303	NM_170758	B230315M08Rik| Clm8| LMIR1| MAIR-I| MAIR-Ia| mcpir1| MMAC8| Pigr4	CD300A molecule
138	Cnnm4	1.56895	94220	NM_033570	5430430O18Rik| Acdp4	cyclin M4
15788	Zfp951	1.56841	626391	NM_001039231	C230055K05Rik	zinc finger protein 951
1361	Heca	1.56823	380629	NM_001033432	Gm869| HDC| HDCL	hdc homolog, cell cycle regulator
8456	Noxo1	1.56661	71893	NM_027988	2310034C04Rik| hslt| P41NOX| P41NOXA| P41NOXB| P41NOXC| Snx28	NADPH oxidase organizer 1
9228	Ehd3	1.5657	57440	NM_020578	Ehd2	EH-domain containing 3
21598	Gm20199	1.56539	100504377	NR_045640		predicted gene, 20199
9046	Frs3	1.56484	107971	NM_144939	4930417B13Rik| AI449674| Frs2beta| Snt2	fibroblast growth factor receptor substrate 3
2178	Rap1b	1.56448	215449	NM_024457	2810443E11Rik	RAS related protein 1b
11777	Thbs1	1.5635	21825	NM_011580	tbsp1| Thbs-1| TSP-1| TSP1	thrombospondin 1
1850	Polr2e	1.56152	66420	NM_025554	2410021N14Rik| 25kDa| AW208866| RPB5| XAP4	polymerase (RNA) II (DNA directed) polypeptide E
799	Shisa4	1.56087	77552	NM_175259	9330132O05Rik| mShisa4| Tmem58	shisa family member 4
1933	Celf5	1.56045	319586	NM_176954	4930565A21Rik| Brunol5	CUGBP, Elav-like family member 5
11689	Kcna4	1.5569	16492	NM_021275	Kv1.4	potassium voltage-gated channel, shaker-related subfamily, member 4
7935	Bbx	1.55654	70508	NM_027444	5530401J07Rik| 5730403O13Rik	bobby sox homolog (Drosophila)
22297	Kcnd1	1.55611	16506	NM_008423	1110037K09Rik| Kca2-1| Kv4.1| mShal1| Shal| Shal1	potassium voltage-gated channel, Shal-related family, member 1
4452	Six4	1.55608	20474	NM_011382	AI047561| AREC3| TrexBF	sine oculis-related homeobox 4
18350	Zfp82	1.55607	330502	NM_177889	A030010D05| Krab16| Mszf3| Zfp-82	zinc finger protein 82
6471	Gm4285	1.55561	100043189	NR_045294	100043189	predicted gene 4285
3284	Slc13a2os	1.55543	790911	NR_003282	Gm11194| OTTMUSG00000000132	solute carrier family 13 (sodium-dependent dicarboxylate transporter), member 2, opposite strand
4962	Pgbd1	1.55521	319207	NM_001162920	4921509E05Rik	piggyBac transposable element derived 1
10726	Cubn	1.55509	65969	NM_001081084	AA408369| AL022750| D2Wsu88e	cubilin (intrinsic factor-cobalamin receptor)
4912	Edaradd	1.55486	171211	NM_133643	1810032E07Rik| 5830469M23Rik| A630043P06| cr	EDAR (ectodysplasin-A receptor)-associated death domain
3629	Cdc6	1.55482	23834	NM_001025779	CDC18L	cell division cycle 6
12285	Mroh8	1.55482	629499	NM_001039557	4922505G16Rik	maestro heat-like repeat family member 8
22142	Cmtm8	1.55479	70031	NM_027294	2700018N07Rik| AA408515| Cklfsf8	CKLF-like MARVEL transmembrane domain containing 8
17755	D630041G03Rik	1.55473	320749	NR_028416		RIKEN cDNA D630041G03 gene
15438	Gm7854	1.55469	665934	NR_028417	EG665934| ENSMUSG00000054483	predicted gene 7854
1870	Plk5	1.55466	216166	NM_183152	6330514A18Rik	polo-like kinase 5
11135	Neb	1.55442	17996	NM_010889	AI595938	nebulin
17091	Mxd1	1.55434	17119	NM_010751	AW122478| Mad| Mad1	MAX dimerization protein 1
8792	Aif1	1.55414	11629	NM_019467	AI607846| AIF-1| D17H6S50E| G1| Iba1	allograft inflammatory factor 1
11206	Abcb11	1.55328	27413	NM_021022	ABC16| Bsep| Lith1| PFIC2| PGY4| SPGP	ATP-binding cassette, sub-family B (MDR/TAP), member 11
10190	Ms4a4d	1.55276	66607	NM_025658	2210417J23Rik	membrane-spanning 4-domains, subfamily A, member 4D
20654	Slc9a5	1.55144	277973	NM_001081332	Gm696	solute carrier family 9 (sodium/hydrogen exchanger), member 5
732	Rab7b	1.55012	226421	NM_145509	5430435G22Rik	RAB7B, member RAS oncogene family
18748	A230057D06Rik	1.54954	319893	NR_015533		RIKEN cDNA A230057D06 gene
19395	Pik3c2a	1.54751	18704	NM_011083	Cpk-m| PI3KC2	phosphatidylinositol 3-kinase, C2 domain containing, alpha polypeptide
1849	Hmha1	1.54724	70719	NM_001142701	6330406L22Rik| AW539505| Ha-1	histocompatibility (minor) HA-1
20927	Sipa1l2	1.54685	244668	NM_001081337	BC058408| mKIAA1389	signal-induced proliferation-associated 1 like 2
14960	Fbxo2	1.54636	230904	NM_176848	FBG1| Fbs1| Fbs2| FBX2| NFB42| Prpl4	F-box protein 2
2163	4933412E12Rik	1.54594	71086	NR_038026		RIKEN cDNA 4933412E12 gene
3045	Tnfsf13	1.54539	69583	NM_001159505	2310026N09Rik| April| Tall2| Tnlg7b| Trdl1	tumor necrosis factor (ligand) superfamily, member 13
6792	Ext1	1.54476	14042	NM_010162	AA409028	exostoses (multiple) 1
20419	Smad1	1.54461	17125	NM_008539	AI528653| Madh1| Madr1| Mlp1| MusMLP	SMAD family member 1
17682	Gm6654	1.54458	626175	NR_038089	EG626175	predicted pseudogene 6654
6712	Matn2	1.54445	17181	NM_016762	Crtm2| matrilin-2	matrilin 2
4378	Sec23a	1.54432	20334	NM_009147	Msec23| Sec23r	SEC23 homolog A, COPII coat complex component
10594	Mxi1	1.54404	17859	NM_001008542	bHLHc11| ENSMUSG00000067085| Gm10197| Mad2	MAX interactor 1, dimerization protein
3551	Hoxb2	1.54397	103889	NM_134032	AI894218| Hox-2.8| Hoxbes2	homeobox B2
2089	4930430F08Rik	1.54381	68281	NM_175128	4930571E09Rik| A730088G13Rik| AW551239| C430008C19Rik	RIKEN cDNA 4930430F08 gene
1865	Apc2	1.54369	23805	NM_011789	AI852447| APCL| R75424	adenomatosis polyposis coli 2
15933	4930519G04Rik	1.54221	67593	NM_026263	1700014B12Rik	RIKEN cDNA 4930519G04 gene
4436	2700049A03Rik	1.54202	76967	NM_029818	mKIAA0586| Ta3| Talpid3	RIKEN cDNA 2700049A03 gene
13212	Gm4349	1.5413	100043305	NR_033637	100043305	predicted gene 4349
81	Tmem14a	1.54037	75712	NM_029398	5730496E24Rik| C85783| PTD011	transmembrane protein 14A
11046	Ggta1	1.54017	14594	NM_010283	alpha Gal| alpha3GalT| AW108479| Gal| GALT| Ggta| Ggta-1	glycoprotein galactosyltransferase alpha 1, 3
15509	Fam114a1	1.54011	68303	NM_026667	1190001N04Rik| 9130005N14Rik| Noxp20	family with sequence similarity 114, member A1
16894	Vopp1	1.53946	232023	NM_146168	AW146242| Ecop	vesicular, overexpressed in cancer, prosurvival protein 1
3708	Klhl11	1.53908	217194	NM_172565	BC011167	kelch-like 11
13476	6530403H02Rik	1.53898	320739	NR_130170		RIKEN cDNA 6530403H02 gene
590	Kif1a	1.53776	16560	NM_001294149	ATSV| C630002N23Rik| Gm1626| Kns1	kinesin family member 1A
21096	Cdkn2d	1.53771	12581	NM_009878	INK4d| p19| p19INK4d	cyclin-dependent kinase inhibitor 2D (p19, inhibits CDK4)
17868	Zik1	1.53735	22775	NM_009577		zinc finger protein interacting with K protein 1
6460	Gm4278	1.53589	100043169	NR_046078	100043169	predicted gene 4278
22410	Zfp182	1.53555	319535	NM_001013387	6330583I20Rik| Znf182	zinc finger protein 182
17832	Peg3os	1.53554	100169889	NR_023846	Apeg3| Peg3as	Peg3 opposite strand
4348	2700097O09Rik	1.53538	72658	NR_030764	AW552125	RIKEN cDNA 2700097O09 gene
1946	Zfp781	1.53408	331188	NM_199062	A130081B01	zinc finger protein 781
3481	Car10	1.53379	72605	NM_028296	2700029L05Rik| BB085816| Ca10	carbonic anhydrase 10
13049	Efna1	1.5336	13636	NM_010107	AI325262| B61| Efl1| Epl1| Eplg1| Lerk1	ephrin A1
724	Dyrk3	1.53288	226419	NM_145508	BC006704	dual-specificity tyrosine-(Y)-phosphorylation regulated kinase 3
1359	Cited2	1.53126	17684	NM_010828	AI835299| ER154-like| Mrg1| Msg2| p35srj	Cbp/p300-interacting transactivator, with Glu/Asp-rich carboxy-terminal domain, 2
12532	Sycp2	1.53064	320558	NM_177191	3830402K23Rik| 4930518F03Rik	synaptonemal complex protein 2
7819	Sema5b	1.53042	20357	NM_013661	AI893641| mKIAA1445| Semag| SemG	sema domain, seven thrombospondin repeats (type 1 and type 1-like), transmembrane domain (TM) and short cytoplasmic domain, (semaphorin) 5B
22957	Nap1l3	1.52987	54561	NM_138742	MB20	nucleosome assembly protein 1-like 3
1954	Glt8d2	1.52974	74782	NM_029102	1110021D20Rik	glycosyltransferase 8 domain containing 2
19576	Prss36	1.52939	77613	NM_001081374	C330007D15Rik	protease, serine 36
6195	Psmb11	1.52925	73902	NM_175204	5830406J20Rik| beta5t	proteasome (prosome, macropain) subunit, beta type, 11
15253	2900005J15Rik	1.52923	67261	NR_027851		RIKEN cDNA 2900005J15 gene
8136	Slc5a3	1.52923	53881	NM_017391	AA623876| BF642829| Smit1	solute carrier family 5 (inositol transporters), member 3
16245	Nyap1	1.52905	243300	NM_175521	6430598A04Rik	neuronal tyrosine-phosphorylated phosphoinositide 3-kinase adaptor 1
18907	Gm2115	1.52896	100039239	NR_045098	100039239| C77713	predicted gene 2115
4332	Heatr5a	1.52878	320487	NM_177171	C230081H03Rik| D930036F22Rik| mKIAA1316	HEAT repeat containing 5A
12434	Snai1	1.52858	20613	NM_011427	Sna| Sna1| Snail| Snail1	snail family zinc finger 1
7233	Lrrk2	1.52845	66725	NM_025730	4921513O20Rik| 9330188B09Rik| AW561911| cI-46| D630001M17Rik| Gm927	leucine-rich repeat kinase 2
17540	Styk1	1.52811	243659	NM_172891	9130025L13| AI326477| Nok	serine/threonine/tyrosine kinase 1
5204	Tfap2a	1.52811	21418	NM_001301674	AP-2| Ap-2 (a)| Ap2| AP2alpha| Ap2tf| Tcfap2a	transcription factor AP-2, alpha
19871	Slc10a2	1.52803	20494	NM_011388	9130221J18Rik| AI605518| ASBT| IBAT| ISBT	solute carrier family 10, member 2
1744	2610028H24Rik	1.52787	76964	NM_029816	ORF67	RIKEN cDNA 2610028H24 gene
3911	Kcnj2	1.52775	16518	NM_008425	IRK1| Kcnf1| Kir2.1	potassium inwardly-rectifying channel, subfamily J, member 2
10967	D330023K18Rik	1.52772	320973	NR_040334		RIKEN cDNA D330023K18 gene
17322	Zfp9	1.52644	22750	NM_011763	1810048F22Rik| AU016736| Krox-4| mszf79-2| Zfp-9	zinc finger protein 9
7727	Lpp	1.52622	210126	NM_178665	9430020K16Rik| AA959454| AU024130| B130055L10Rik| C79715| D630048H16	LIM domain containing preferred translocation partner in lipoma
14587	Gm12942	1.52564	100039968	NM_001099319	OTTMUSG00000009332| Zmym6nb	predicted gene 12942
11823	Tyro3	1.52564	22174	NM_001290800	AI323366| Brt| Dtk| Etk-2| etk2/tyro3| Rse| Sky| Tif| tk19-1| TK19-2	TYRO3 protein tyrosine kinase 3
7462	Pde1b	1.52358	18574	NM_008800	Pde1b1	phosphodiesterase 1B, Ca2+-calmodulin dependent
19379	Spon1	1.52342	233744	NM_145584	AI666765| AW455831| BC020531| D330035F22Rik| FSP	spondin 1, (f-spondin) extracellular matrix protein
10467	Slit1	1.52296	20562	NM_015748	mKIAA0813| Slil1	slit homolog 1 (Drosophila)
16848	Scrn1	1.52284	69938	NM_027268	2810019K23Rik| 6330535A03Rik| AI852905| mKIAA0193| SES1	secernin 1
2817	2010001A14Rik	1.5205	76516	NR_131042		RIKEN cDNA 2010001A14 gene
20713	Nfat5	1.52044	54446	NM_133957	AI225870| B130038B15Rik| CAG-8| CAG80| mKIAA0827| NFATL1| nfatz| OREBP| TonEBP	nuclear factor of activated T cells 5
19418	Acsm2	1.52038	233799	NM_001177977	AI315615| BC031140	acyl-CoA synthetase medium-chain family member 2
6375	Scara3	1.52028	219151	NM_172604	APC7| C130058N24Rik| CSR| CSR1| MSLR1| MSRL1	scavenger receptor class A, member 3
1495	Tube1	1.52022	71924	NM_028006	2310061K05Rik| AI551343| Tube	epsilon-tubulin 1
6622	Ptger4	1.51976	19219	NM_008965	EP4| Ptgerep4	prostaglandin E receptor 4 (subtype EP4)
18142	Nlrp4e	1.51961	446099	NM_001004194	4930406H16Rik| Nalp-epsilon| Nalp4e| Nlrp4	NLR family, pyrin domain containing 4E
6225	Pck2	1.51809	74551	NM_028994	1810010O14Rik| 9130022B02Rik| PEPCK-M	phosphoenolpyruvate carboxykinase 2 (mitochondrial)
24	Mcmdc2	1.51722	240697	NM_177722	6030422M02Rik	minichromosome maintenance domain containing 2
6632	Wdr70	1.51679	545085	NM_001081402	4833422F06Rik	WD repeat domain 70
744	Nuak2	1.51675	74137	NM_028778	1200013B22Rik| mKIAA0537| Omphk2| Snark	NUAK family, SNF1-like kinase, 2
2859	Zfp39	1.51661	22698	NM_011758	CTfin33| Zfp-39	zinc finger protein 39
5547	Arrdc3	1.5161	105171	NM_001042591	AI450344| mKIAA1376	arrestin domain containing 3
6058	Bmp4	1.51546	12159	NM_007554	Bmp-4| Bmp2b| Bmp2b-1| Bmp2b1	bone morphogenetic protein 4
19498	Apobr	1.51534	171504	NM_138310	Apob-48r| Apob48r	apolipoprotein B receptor
12416	Sulf2	1.51512	72043	NM_001252579	2010004N24Rik| AU020235| mKIAA1247| MSulf-2	sulfatase 2
18744	Snord64	1.51424	100217429	NR_028529	MBII-13	small nucleolar RNA, C/D box 64
10577	Gm19557	1.51401	100503104	NR_045322		predicted gene, 19557
6253	Khnyn	1.51395	219094	NM_027143	6330555F21| 9130227C08Rik| AI605259| Kiaa0323| mKIAA0323	KH and NYN domain containing
12493	Nespas	1.51389	56802	NR_002846	Gnas-as| Nespos	neuroendocrine secretory protein antisense
12811	Smad9	1.51387	55994	NM_019483	MADH6| Madh8| Madh9| Smad8	SMAD family member 9
10912	Gtf3c5	1.5137	70239	NM_001290484	2700084A09Rik| TFiiiC2-63| TFIIIC63	general transcription factor IIIC, polypeptide 5
15470	9230114K14Rik	1.51367	414108	NR_015537		RIKEN cDNA 9230114K14 gene
470	Fbxo36	1.51325	66153	NM_025386	0610008D19Rik| 1110020F21Rik| 2410002G19Rik| D1Ertd757e	F-box protein 36
4212	Odc1	1.51302	18263	NM_013614	ODC	ornithine decarboxylase, structural 1
11155	Gm13544	1.51256	100502932	NR_040365	OTTMUSG00000012672	predicted gene 13544
16025	Adam1b	1.51245	280667	NM_172125	Adam1| Ftna	a disintegrin and metallopeptidase domain 1b
4785	Ppp2r5c	1.51195	26931	NM_001135001	2610043M05Rik| 2700063L20Rik| AI060890| AW545884| C85228| D12Bwg0916e| mKIAA0044	protein phosphatase 2, regulatory subunit B', gamma
218	Slc40a1	1.5119	53945	NM_016917	Dusg| Fpn1| IREG1| MTP| MTP1| Ol5| Pcm| Slc11a3| Slc39a1	solute carrier family 40 (iron-regulated transporter), member 1
1971	Tcp11l2	1.51189	216198	NM_146008	E430026E19Rik	t-complex 11 (mouse) like 2
7311	Rhebl1	1.51184	69159	NM_026967	1810036J22Rik| Rheb2	Ras homolog enriched in brain like 1
1976	Tmem263	1.5118	103266	NM_001013028	AI597468	transmembrane protein 263
7962	Tbc1d23	1.51151	67581	NM_026254	4930451A13Rik| AU015720| AU043671| AU043778| D030022P07Rik| W51689	TBC1 domain family, member 23
6293	Ska3	1.51094	219114	NM_198605	F630043A04Rik	spindle and kinetochore associated complex subunit 3
1184	Ephx1	1.51004	13849	NM_010145	EH| Eph-1| Eph1| Epxh1| mEH	epoxide hydrolase 1, microsomal
3904	Abca8b	1.50978	27404	NM_013851	Abca8	ATP-binding cassette, sub-family A (ABC1), member 8b
13747	Pdp1	1.5091	381511	NM_001290387	Gm1024| Ppm2c	pyruvate dehyrogenase phosphatase catalytic subunit 1
15499	Rell1	1.50864	100532	NM_145923	AA536743	RELT-like 1
20839	Foxl1	1.50863	14241	NM_008024	fkh-6| Fkh6| FREAC7	forkhead box L1
4771	Meg3	1.50838	17263	NR_027651	2900016C05Rik| 3110050O07Rik| 6330408G06Rik| AI425946| AW108224| D12Bwg1266e| Gtl2| R74756| R75394	maternally expressed 3
18617	Trpm4	1.50696	68667	NM_175130	1110030C19Rik| AW047689| LTrpC-4| LTRPC4| TRPM4B	transient receptor potential cation channel, subfamily M, member 4
22273	Shroom4	1.50675	208431	NM_001040459	D430043L16Rik| Gm724| Shrm4	shroom family member 4
18815	Slco3a1	1.50647	108116	NM_001038643	5830414C08Rik| Anr1| MJAM| OATP-D| R75096| Slc21a11	solute carrier organic anion transporter family, member 3a1
21017	Slc36a4	1.50607	234967	NM_172289	6330573I15Rik| PAT4	solute carrier family 36 (proton/amino acid symporter), member 4
21871	Pls1	1.50606	102502	NM_001033210	AI427122	plastin 1 (I-isoform)
9600	Pcdhga12	1.50573	93724	NM_033595	pc2c| Pcdh13	protocadherin gamma subfamily A, 12
6423	Pdlim2	1.50545	213019	NM_001253736	4732462F18Rik| Slim	PDZ and LIM domain 2
6371	Scara5	1.50536	71145	NM_028903	4932433F15Rik| 4933425F03Rik| AV278087| Tesr	scavenger receptor class A, member 5
15708	Shroom3	1.50516	27428	NM_015756	AL022960| D5Ertd287e| Shrm| Shrm3	shroom family member 3
4205	Rock2	1.50488	19878	NM_009072	B230113H15Rik| mKIAA0619| Rho-kinase| Rock-II| Rock2m| ROKalpha	Rho-associated coiled-coil containing protein kinase 2
23189	S100g	1.50476	12309	NM_009789	AU042539| CaBP-D9K| CABP1| Cabp9k| Calb3	S100 calcium binding protein G
13273	Gja5	1.50408	14613	NM_008121	5730555N10Rik| Cnx40| Cx40| Gja-5	gap junction protein, alpha 5
2198	Hmga2	1.50305	15364	NM_010441	9430083A20Rik| HMGI-C| Hmgic| pg| pygmy	high mobility group AT-hook 2
8667	Cyp4f14	1.50292	64385	NM_001204333	1300014O15Rik| cyp4f-14	cytochrome P450, family 4, subfamily f, polypeptide 14
9157	Gm11110	1.50292	100169874	NR_033508	ENSMUSG00000079414	predicted gene 11110
8768	Hspa1l	1.5029	15482	NM_013558	Hsc70t| Msh5	heat shock protein 1-like
13492	Pde5a	1.50285	242202	NM_153422	Cgbpde| Cn5n| Pde5| Pde5a1| PDE5a2	phosphodiesterase 5A, cGMP-specific
13869	Rpp25l	1.5027	69961	NM_027278	2810432D09Rik| AW987258| Rppl25	ribonuclease P/MRP 25 subunit-like
23170	A830080D01Rik	1.50171	382252	NM_001033472	2310067E24Rik| Gm1146	RIKEN cDNA A830080D01 gene
13050	Efna3	1.50101	13638	NM_010108	AW494418| EFL-2| Ehk1-L| Epl3| LERK-3	ephrin A3
2507	Fbxo48	1.50093	319701	NM_176982	A630050E13Rik	F-box protein 48
10454	Aldh18a1	1.50016	56454	NM_153554	2810433K04Rik| AI429789| Pycs	aldehyde dehydrogenase 18 family, member A1
17706	Fam60a	1.50007	56306	NM_019643	Ppcs1| Pptcs1| Tera	family with sequence similarity 60, member A
549	Ackr3	1.50001	12778	NM_007722	AW541270| Cmkor1| CXC-R7| CXCR-7| Cxcr7| RDC-1| Rdc1	atypical chemokine receptor 3
7422	Espl1	0.666671	105988	NM_001014976	AL024103| AU045071| Cerp| ESP1| PRCE| SSE	extra spindle pole bodies 1, separase
13659	Nexn	0.666638	68810	NM_199465	1110046H09Rik| AA553326| NELIN	nexilin
2024	Slc25a3	0.666574	18674	NM_133668	5730556H19Rik| Phc| PTP	solute carrier family 25 (mitochondrial carrier, phosphate carrier), member 3
13974	5830415F09Rik	0.66639		NM_029086
1131	Spta1	0.666129	20739	NM_011465	AF093576| AI451697| ha| ihj| nmf4| sph| Spna-1| Spna1	spectrin alpha, erythrocytic 1
13786	Coq3	0.666055	230027	NM_172687	4732433J24| C77934	coenzyme Q3 methyltransferase
16373	Atp5j2	0.665974	57423	NM_020582	1110019H14Rik	ATP synthase, H+ transporting, mitochondrial F0 complex, subunit F2
11973	Tmc2	0.665852	192140	NM_138655	CWEA2	transmembrane channel-like gene family 2
16239	Fbxo24	0.665755	71176	NM_027708	4933422D21Rik| Fbx24	F-box protein 24
22082	Nme6	0.665742	54369	NM_018757	nm23-M6	NME/NM23 nucleoside diphosphate kinase 6
2900	Srebf1	0.665685	20787	NM_011480	ADD1| bHLHd1| SREBP-1a| SREBP1| SREBP1c	sterol regulatory element binding transcription factor 1
3458	Akap1	0.665665	11640	NM_001042541	Akap| AKAP121| AKAP84| C76494| C81186| DAKAP1| S-AKAP84	A kinase (PRKA) anchor protein 1
15451	Qdpr	0.665632	110391	NM_024236	2610008L04Rik| D5Ertd371e| Dhpr| PKU2	quinoid dihydropteridine reductase
13518	Alpk1	0.665571	71481	NM_027808	8430410J10Rik| LAK	alpha-kinase 1
528	Ugt1a2	0.665504	22236	NM_013701	UDPGT 1-2| Ugt1	UDP glucuronosyltransferase 1 family, polypeptide A2
17779	Nat14	0.665355	269854	NM_201355	BC047219	N-acetyltransferase 14
17021	Mrpl53	0.665217	68499	NM_026744	1110007K17Rik	mitochondrial ribosomal protein L53
3760	Rdm1	0.665066	66599	NM_025654	2410008M22Rik| AW212028| Rad52b	RAD52 motif 1
1880	Adat3	0.664923	100113398	NM_001100606	A430024H01Rik	adenosine deaminase, tRNA-specific 3
6603	Fgf14	0.664359	14169	NM_207667	FHF-4| Fhf4| mFHF-4(1B)	fibroblast growth factor 14
2581	Chac2	0.664347	68044	NM_026527		ChaC, cation transport regulator 2
2435	AA413626	0.664201	100359413	NR_102683		expressed sequence AA413626
14824	Akr7a5	0.663901	110198	NM_025337	0610025K21Rik| Afar| Afar1| Akr7a2	aldo-keto reductase family 7, member A5 (aflatoxin aldehyde reductase)
14805	Camk2n1	0.66381	66259	NM_025451	1810006K23Rik| AI848599| AI891706	calcium/calmodulin-dependent protein kinase II inhibitor 1
2963	Cox10	0.663652	70383	NM_178379	2410004F01Rik| AU042636	cytochrome c oxidase assembly protein 10
18412	Lgi4	0.663322	243914	NM_144556	clp| Lgil3	leucine-rich repeat LGI family, member 4
10518	Ndufb8	0.663147	67264	NM_026061	2900010I05Rik| AI987932	NADH dehydrogenase (ubiquinone) 1 beta subcomplex 8
9556	Pcdhac1	0.663087	353236	NM_001003671	CNRc1	protocadherin alpha subfamily C, 1
15314	Abhd1	0.662555	57742	NR_003522	LABH-1| LABH1	abhydrolase domain containing 1
984	Atp1b1	0.662459	11931	NM_009721	Atp4b| Atpb| Atpb-1| NKbeta1	ATPase, Na+/K+ transporting, beta 1 polypeptide
17417	Gpr162	0.662346	14788	NM_013533	A-2| BC031437| Grca	G protein-coupled receptor 162
3091	Med11	0.662285	66172	NM_025397	1110030J09Rik| AI465144| AW545069	mediator complex subunit 11
13762	Tmem64	0.661961	100201	NM_181401	9630015D15Rik| AI790744| AV300874	transmembrane protein 64
3736	Ccr10	0.661856	12777	NM_007721	Cmkbr9| Gpr2	chemokine (C-C motif) receptor 10
12277	1110008F13Rik	0.661685	67388	NM_026124	AI316789	RIKEN cDNA 1110008F13 gene
3512	Pdk2	0.660965	18604	NM_133667		pyruvate dehydrogenase kinase, isoenzyme 2
22765	Dmd	0.660765	13405	NM_007868	Dp427| Dp71| DXSmh7| DXSmh9| dys| mdx| pke	dystrophin, muscular dystrophy
4377	Clec14a	0.660753	66864	NM_025809	1200003C23Rik| AI642649	C-type lectin domain family 14, member a
11890	Spata5l1	0.660476	214616	NM_001033256	AV141009| C130039A10Rik	spermatogenesis associated 5-like 1
4588	Fos	0.660284	14281	NM_010234	c-fos| cFos| D12Rfj1	FBJ osteosarcoma oncogene
3451	2210416O15Rik	0.660034	70393	NR_045499		RIKEN cDNA 2210416O15 gene
20108	Ubxn8	0.659993	108159	NM_178648	D0H8S2298E| Rep-8| Rep8h| Ubxd6	UBX domain protein 8
17850	2810047C21Rik1	0.659943	72716	NR_015598	100042870| 2810047C21Rik| AA683836| Gm4082	RIKEN cDNA 2810047C21 gene 1
13557	Ppa2	0.659893	74776	NM_001293641	1110013G13Rik| Sid6306	pyrophosphatase (inorganic) 2
14975	Pgd	0.659454	110208	NM_001081274	0610042A05Rik| AU019875| C78335	phosphogluconate dehydrogenase
19404	Coq7	0.659312	12850	NM_001304758	clk-1	demethyl-Q 7
17203	Mitf	0.659197	17342	NM_001113198	BCC2| Bhlhe32| bw| Gsfbcc2| mi| vit| Vitiligo| Wh	microphthalmia-associated transcription factor
3398	Pigw	0.658854	70325	NM_027388	2610044A17Rik| Gwt1	phosphatidylinositol glycan anchor biosynthesis, class W
15917	Acacb	0.658853	100705	NM_133904	Acc2| Accb| AI597064| AW743042	acetyl-Coenzyme A carboxylase beta
8467	Meiob	0.658579	75178	NM_029197	4930528F23Rik| MLZ-675	meiosis specific with OB domains
14873	Casp9	0.658495	12371	NM_015733	AI115399| APAF-3| AW493809| CASP-9| Caspase-9| ICE-LAP6| Mch6	caspase 9
17994	Psg28	0.658387	114871	NM_054063	cea16	pregnancy-specific glycoprotein 28
3012	Aurkb	0.658364	20877	NM_011496	Aik2| AIM-1| Aim1| AIRK2| AL022959| Ark2| AurB| IPL1| STK-1| Stk12| Stk5	aurora kinase B
9540	Gm6756	0.658153	627427	NR_076393	EG627427	predicted gene 6756
13065	Chrnb2	0.657875	11444	NM_009602	Acrb-2| Acrb2| C030030P04Rik| [b]2-nAchR	cholinergic receptor, nicotinic, beta polypeptide 2 (neuronal)
13736	Ndufaf6	0.657629	76947	NM_001085493	2310030N02Rik	NADH dehydrogenase (ubiquinone) complex I, assembly factor 6
4322	3110039M20Rik	0.657522	67293	NR_026733		RIKEN cDNA 3110039M20 gene
22285	Ccdc22	0.657431	54638	NM_138603	AI481216| DXImx40e| Ppp1r3f| Sfc22	coiled-coil domain containing 22
2125	Csrp2	0.657425	13008	NM_007792	AW551867| Crp2| SmLim	cysteine and glycine-rich protein 2
17346	Atp6v1e1	0.657381	11973	NM_007510	2410029D23Rik| Atp6e| Atp6e2| Atp6v1e| D6Ertd385e| E2| P31| Vma4	ATPase, H+ transporting, lysosomal V1 subunit E1
12008	Mavs	0.657248	228607	NM_001206385	cardif| D430028G21Rik| IPS-1| Visa	mitochondrial antiviral signaling protein
2965	2810001G20Rik	0.657181	66456	NR_033780	AW045514	RIKEN cDNA 2810001G20 gene
10764	Etl4	0.657161	208618	NM_001081006	6620402G01Rik| 9430077C05Rik| BC026657| E330027G05Rik| Etl-4| Skt	enhancer trap locus 4
19796	Trpm5	0.65697	56843	NM_020277	9430099A16Rik| LTrpC-5| Ltrpc5| Mtr1	transient receptor potential cation channel, subfamily M, member 5
11241	Cdca7	0.656905	66953	NM_025866	2310021G01Rik| AU044109| JPO1	cell division cycle associated 7
4791	Mok	0.656662	26448	NM_011973	Rage| RAGE1| Stk30	MOK protein kinase
3574	Mrpl45	0.656424	67036	NM_025927	2600005P05Rik| AU043542| R75241	mitochondrial ribosomal protein L45
19560	Bcl7c	0.656156	12055	NM_009746	C230096E12Rik	B cell CLL/lymphoma 7C
7197	1810021B22Rik	0.656117	69120	NR_040417		RIKEN cDNA 1810021B22 gene
1756	Col18a1	0.655962	12822	NM_009929		collagen, type XVIII, alpha 1
4992	Hist1h4m	0.655928	100041230	NM_001195421	Gm11275| OTTMUSG00000000446	histone cluster 1, H4m
21951	Mrpl3	0.655837	94062	NM_053159	2010320L16Rik| 5930422H18Rik| AA407889	mitochondrial ribosomal protein L3
8469	Hagh	0.65582	14651	NM_024284	BC019817| Glo-2| Glo2| Rsp29	hydroxyacyl glutathione hydrolase
2430	Zmat5	0.655809	67178	NM_026015	2610510L01Rik| D11Bwg0572e| D11Bwg1548e	zinc finger, matrin type 5
15055	Prkcz	0.655616	18762	NM_001039079	AI098070| aPKCzeta| C80388| nPKC-zeta| Pkcz| R74924| zetaPKC	protein kinase C, zeta
14817	Tmco4	0.655391	77056	NM_001305423	4632413C14Rik| AI430825	transmembrane and coiled-coil domains 4
2408	4921536K21Rik	0.655329	67430	NM_026150	AV043724	RIKEN cDNA 4921536K21 gene
16892	Pyurf	0.655146	66459	NM_025574	2610022G08Rik| AI847956| Prey	Pigy upstream reading frame
6935	Parp10	0.655065	671535	NM_001163576		poly (ADP-ribose) polymerase family, member 10
13096	S100a16	0.655016	67860	NM_026416	2300002L21Rik| AI325039| AI663996| DT1P1A7| S100F	S100 calcium binding protein A16
5648	Mccc2	0.654859	78038	NM_030026	4930552N12Rik| MCCB	methylcrotonoyl-Coenzyme A carboxylase 2 (beta)
14727	Trim63	0.654791	433766	NM_001039048	MuRF1| RF1| Rnf28	tripartite motif-containing 63
4157	Fkbp1b	0.654771	14226	NM_016863	12.6kDa| AW494148| calstabin2| FKBP12.6	FK506 binding protein 1b
7176	Cdpf1	0.654496	72355	NM_197998	2210021J22Rik	cysteine rich, DPF motif domain containing 1
3519	Fam117a	0.654483	215512	NM_172543	5730593F17Rik| AW548096	family with sequence similarity 117, member A
15833	Idua	0.654474	15932	NM_172997	6030426D08	iduronidase, alpha-L-
20745	Il34	0.654334	76527	NM_029646	2010004A03Rik| AI593503	interleukin 34
21775	Gsta4	0.654314	14860	NM_010357	GST5.7| mGsta4	glutathione S-transferase, alpha 4
3929	Ttyh2	0.65416	117160	NM_053273	1110001A03Rik	tweety family member 2
13528	Egf	0.654143	13645	NM_010113	AI790464	epidermal growth factor
21158	Acad8	0.654107	66948	NM_025862	2310016C19Rik| AI786953	acyl-Coenzyme A dehydrogenase family, member 8
3273	Rab34	0.653983	19376	NM_001159482	AI326479| Narr| Rah| Rah1	RAB34, member RAS oncogene family
8750	Tnxb	0.653738	81877	NM_031176	Tn-mhc| Tnx	tenascin XB
18898	Tmc3	0.653652	233424	NM_177695	9030203A06	transmembrane channel-like gene family 3
7952	Trmt10c	0.653556	52575	NM_029092	1300018J16Rik| D16Ertd454e| Rg9mtd1| Rnmtd1	tRNA methyltransferase 10C
9925	Nudt8	0.653514	66387	NM_025529	2310039H17Rik	nudix (nucleoside diphosphate linked moiety X)-type motif 8
21955	Aste1	0.653514	66595	NM_025651	1100001A21Rik| AV006403	asteroid homolog 1 (Drosophila)
6305	Phf11c	0.653471	628705	NM_001164289	EG628705| Gm6907| Phf11	PHD finger protein 11C
21711	Myo1e	0.652687	71602	NM_181072	2310020N23Rik| 9130023P14Rik| AA407778| myosin-1e| myr 3	myosin IE
9342	Gm6225	0.652489	633947	NR_033457	EG621440	predicted gene 6225
14061	Hsdl2	0.652291	72479	NM_001301367	2610207I16Rik	hydroxysteroid dehydrogenase like 2
6696	Ropn1l	0.652078	252967	NM_145852	Akapasp| ASP| AV047578	ropporin 1-like
12963	Gatb	0.651934	229487	NM_144896	9430026F02Rik| Pet112| Pet112l	glutamyl-tRNA(Gln) amidotransferase, subunit B
10560	Sfxn2	0.651743	94279	NM_053196	C79732| F630107H02Rik	sideroflexin 2
7180	Trmu	0.651712	72026	NM_028063	1110005N20Rik| 1600025P05Rik| AI314320| Trmt1	tRNA 5-methylaminomethyl-2-thiouridylate methyltransferase
474	C130026I21Rik	0.651626	620078	NM_175219	4930565N07Rik| OTTMUSG00000029174	RIKEN cDNA C130026I21 gene
12616	Mrps28	0.651621	66230	NM_025434	1500012D08Rik| AW061224	mitochondrial ribosomal protein S28
21120	Swsap1	0.651444	66962	NM_025870	2310047B19Rik	SWIM type zinc finger 7 associated protein 1
3709	Acly	0.651349	104112	NM_134037	A730098H14Rik| AW538652	ATP citrate lyase
6455	Sucla2	0.651328	20916	NM_011506	4930547K18Rik	succinate-Coenzyme A ligase, ADP-forming, beta subunit
16963	9130221F21Rik	0.651081	330350	NR_046180	9130221F21	RIKEN cDNA 9130221F21 gene
10109	Tmem223	0.651064	66836	NM_025791	0610006I08Rik	transmembrane protein 223
10349	1700018L02Rik	0.651059	67329	NR_028360		RIKEN cDNA 1700018L02 gene
22023	Amigo3	0.65082	320844	NM_177275	ali3| E430002N15Rik| mKIAA1851	adhesion molecule with Ig like domain 3
16090	Setd8	0.650584		NM_030241
6230	Psme2	0.65044	19188	NM_001029855	AA589371| AI788882| PA28b	proteasome (prosome, macropain) activator subunit 2 (PA28 beta)
3041	Cd68	0.650367	12514	NR_110993	gp110| Lamp4| Scard1	CD68 antigen
13202	Mllt11	0.649727	56772	NM_019914	Af1q| AI839562| Zfp692	myeloid/lymphoid or mixed-lineage leukemia
6194	Psmb5	0.649575	19173	NM_011186		proteasome (prosome, macropain) subunit, beta type 5
7866	Pla1a	0.649566	85031	NM_134102	AA986889| Ps-pla1| Pspla1	phospholipase A1 member A
15826	Atp5k	0.649356	11958	NM_007507	2610008D24Rik| Atp5i| Lfm1	ATP synthase, H+ transporting, mitochondrial F1F0 complex, subunit E
17020	Ccdc142	0.649306	243510	NM_001081266	A230058J24Rik	coiled-coil domain containing 142
1120	Ifi205	0.64862	226695	NM_172648	D3| D3cDNA| Ifi205a	interferon activated gene 205
18908	Fah	0.64857	14085	NM_010176		fumarylacetoacetate hydrolase
5995	Gm3219	0.648552	100041231	NR_027380	100041231	predicted pseudogene 3219
6776	Sybu	0.648484	319613	NM_001285843	Golsyn	syntabulin (syntaxin-interacting)
4803	Exoc3l4	0.648354	74190	NM_001289487	1200009I06Rik| 1600013K19Rik	exocyst complex component 3-like 4
3109	Inca1	0.648226	103844	NM_001252484	AI842396	inhibitor of CDK, cyclin A1 interacting protein 1
21143	Bmper	0.647903	73230	NM_028472	3110056H04Rik| Crim3| CV-2| Cv2	BMP-binding endothelial regulator
14573	Tekt2	0.647886	24084	NM_011902	AU014974| tektin-t	tektin 2
16630	Wdr91	0.647664	101240	NM_001013366	9530020G05Rik| AI987683| AU018665	WD repeat domain 91
11207	Dhrs9	0.647648	241452	NM_175512	C730025I08Rik| Rdh15	dehydrogenase/reductase (SDR family) member 9
22854	Itgb1bp2	0.647559	26549	NM_013712	Chordc3	integrin beta 1 binding protein 2
19422	Acsm3	0.647329	20216	NM_212442	Sa| Sah	acyl-CoA synthetase medium-chain family member 3
14487	Ppcs	0.647187	106564	NM_026494	6330579B17Rik| AI413471| AI790434	phosphopantothenoylcysteine synthetase
10117	Gng3	0.647166	14704	NM_010316		guanine nucleotide binding protein (G protein), gamma 3
6169	Snord8	0.647045	100217445	NR_028542	MBII-28	small nucleolar RNA, C/D box 8
5088	Gmnn	0.646794	57441	NM_020567	AW546347| Gem	geminin
20626	Rrad	0.646595	56437	NM_019662	Rad| REM3	Ras-related associated with diabetes
10345	4430402I18Rik	0.64595	381218	NM_198651	AW122618| Spata6l	RIKEN cDNA 4430402I18 gene
17541	Ybx3	0.645634	56449	NM_011733	Csda| dbpA| Dpba| MSY3| MSY4| oxyR| Yb2	Y box protein 3
18845	Anpep	0.645597	16790	NM_008486	AP-M| AP-N| Apn| Cd13| P150	alanyl (membrane) aminopeptidase
9107	Stap2	0.645486	106766	NM_145934	AW049765| STAP-2	signal transducing adaptor family member 2
1043	Sdhc	0.645065	66052	NM_025321	0610010E03Rik| AI316496| AU019277	succinate dehydrogenase complex, subunit C, integral membrane protein
13605	Gbp7	0.644512	229900	NM_145545	9830147J24Rik	guanylate binding protein 7
3537	Atp5g1	0.644376	11951	NM_007506		ATP synthase, H+ transporting, mitochondrial F0 complex, subunit C1 (subunit 9)
7266	Pced1b	0.6443	239647	NM_172293	Fam113b	PC-esterase domain containing 1B
6598	Ggact	0.644232	223267	NM_145466	A2ld1	gamma-glutamylamine cyclotransferase
3497	Acsf2	0.644104	264895	NM_153807		acyl-CoA synthetase family member 2
16038	Ppp1cc	0.643564	19047	NM_013636	dis2m1| PP-1G| PP1	protein phosphatase 1, catalytic subunit, gamma isoform
3116	C1qbp	0.643427	12261	NM_007573	AA407365| AA986492| D11Wsu182e| gC1qBP| HABP1| P32	complement component 1, q subcomponent binding protein
21670	Spg21	0.643285	27965	NM_138584	ACP33| BM-019| C78576| D9Wsu18e| GL010| MAST	spastic paraplegia 21 homolog (human)
16913	Snca	0.643112	20617	NM_009221	alphaSYN| NACP	synuclein, alpha
3040	Mpdu1	0.643073	24070	NM_011900	LEC35| SL15| Supl15h	mannose-P-dolichol utilization defect 1
2913	Shmt1	0.643029	20425	NM_009171	AI324848| AI385541| C81125| mshmt| mshmt1| mshmt2| Shmt	serine hydroxymethyltransferase 1 (soluble)
9758	Sh3tc2	0.642638	225608	NM_172628	D430044G18Rik	SH3 domain and tetratricopeptide repeats 2
14607	Rnf19b	0.642397	75234	NM_029219	4930534K13Rik| 4930555L03Rik| Ibrdc3	ring finger protein 19B
8558	Ip6k3	0.642213	271424	NM_173027	D830007E07Rik| Ihpk3	inositol hexaphosphate kinase 3
2916	Natd1	0.64216	24083	NM_025294	AI256713| F3-2| Gm16515| Gtlf3b	N-acetyltransferase domain containing 1
23025	BC065397	0.64212	436230	NR_033324	parl7| R75336	cDNA sequence BC065397
17347	Bcl2l13	0.642119	94044	NM_153516	BCL-RAMBO| E430016C20Rik| Mil-1| Mil1	BCL2-like 13 (apoptosis facilitator)
2033	Hal	0.641482	15109	NM_010401	his| histidase| Hsd	histidine ammonia lyase
1352	Adgrg6	0.641325	215798	NM_001002268	1190004A11Rik| AI449247| AW045736| DREG| Gm222| Gpr126	adhesion G protein-coupled receptor G6
21021	Naalad2	0.6413	72560	NM_028279	2700022G20Rik| D9Ertd285e| Folh1b| GCP3| GCPIII| NAADALASE2| NAALADASE2	N-acetylated alpha-linked acidic dipeptidase 2
13201	Gm16740	0.641174	100504029	NR_108026		predicted gene, 16740
16648	Atp6v0a4	0.640619	140494	NM_080467	a4| Atp6n1b	ATPase, H+ transporting, lysosomal V0 subunit A4
18205	Dedd2	0.640586	67379	NM_207677	2410050E11Rik| FLAME-3	death effector domain-containing DNA binding protein 2
4993	Hist1h4n	0.640103	319161	NM_175657		histone cluster 1, H4n
20444	Ptger1	0.639969	19216	NM_013641	42kDa| EP1| Ptgerep1	prostaglandin E receptor 1 (subtype EP1)
282	Gm20257	0.639963	100504501	NR_045007		predicted gene, 20257
14648	Nkain1	0.639958	67149	NM_025998	2610200G18Rik| 2810426C15Rik	Na+/K+ transporting ATPase interacting 1
4700	Ifi27	0.639781	52668	NM_194067	1110013J02Rik| 2900026P10Rik| D12Ertd647e| Ifi27l1| ISG12a	interferon, alpha-inducible protein 27
797	Timm17a	0.639738	21854	NM_011590	17kDa| mTim17a	translocase of inner mitochondrial membrane 17a
15795	Gbp11	0.639736	634650	NM_001039647	EG634650| Gm7141	guanylate binding protein 11
20833	Cox4i1	0.639732	12857	NM_009941	AL024441| COX| COX IV-1| Cox4| Cox4a| COXIV| IV-1	cytochrome c oxidase subunit IV isoform 1
3707	Klhl10	0.639469	66720	NM_025727	4921517C11Rik	kelch-like 10
21233	Spa17	0.639	20686	NM_011449	Sp17	sperm autoantigenic protein 17
17496	Clec2d	0.638984	93694	NM_053109	Clr-b| Clrb| Ocil	C-type lectin domain family 2, member d
20359	Slc27a1	0.638944	26457	NM_011977	Fatp| FATP1	solute carrier family 27 (fatty acid transporter), member 1
397	Bcs1l	0.638098	66821	NM_001305652	9130022O19Rik	BCS1-like (yeast)
10351	Rcl1	0.637983	59028	NM_021525	2310040A02Rik| AI789745| C76567| Rnac| RPCL1	RNA terminal phosphate cyclase-like 1
5187	Nrn1	0.637972	68404	NM_153529	0710008J23Rik| Cpg15| Nrn	neuritin 1
19636	Uros	0.637944	22276	NM_001302085	AI415298| UROIIIS| Uros3	uroporphyrinogen III synthase
2176	Slc35e3	0.637904	215436	NM_029875	9330166G04Rik| AI481200	solute carrier family 35, member E3
3593	Fbxo47	0.637895	72973	NM_001081435	2900052P03Rik| Gm1562	F-box protein 47
18607	Aldh16a1	0.637794	69748	NM_145954	2410004H02Rik| AI452234| mFLJ00209	aldehyde dehydrogenase 16 family, member A1
19942	Angpt2	0.637082	11601	NM_007426	Agpt2| Ang-2| Ang2	angiopoietin 2
15869	Ddx51	0.636975	69663	NM_027156	2310061O04Rik| AA537002| C81583| R75505	DEAD (Asp-Glu-Ala-Asp) box polypeptide 51
4113	Ccdc57	0.636838	71276	NM_027745	4933434G05Rik	coiled-coil domain containing 57
821	Gm19705	0.63677	100503460	NR_045324		predicted gene, 19705
4236	4930549C15Rik	0.636738	75243	NR_130981		RIKEN cDNA 4930549C15 gene
2795	Lyrm7	0.636303	75530	NM_029327	1700024C24Rik| 9330147L21Rik	LYR motif containing 7
1446	Arhgap18	0.63628	73910	NM_176837	4833419J07Rik| AI314906| AI843501	Rho GTPase activating protein 18
1465	Tpd52l1	0.636076	21987	NM_009413	D53	tumor protein D52-like 1
6028	1700091H14Rik	0.635958	73553	NR_073362	100041930| Gm3578	RIKEN cDNA 1700091H14 gene
3156	Ctns	0.635812	83429	NM_031251	AI195360| AW049661	cystinosis, nephropathic
840	Cfh	0.635733	12628	NM_009888	Mud-1| NOM| Sas-1| Sas1	complement component factor h
4558	Ptgr2	0.635679	77219	NM_001252626	1810016I24Rik| 9130222H03Rik| 9630002F03Rik| AI838763| B830026H24Rik| PGR-2| PRG-2| Zadh1	prostaglandin reductase 2
3755	Rnd2	0.635656	11858	NM_009708	Arhn| Rohn	Rho family GTPase 2
7617	Ccdc74a	0.635653	72315	NM_001166164	2310015A05Rik	coiled-coil domain containing 74A
443	Acsl3	0.635494	74205	NM_028817	2610510B12Rik| Acs3| C85929| Facl3| Pro2194	acyl-CoA synthetase long-chain family member 3
19245	Dchs1	0.635155	233651	NM_001162943	3110041P15Rik| C130033F22Rik| CDH25| FIB1| Gm165| PCDH16	dachsous 1 (Drosophila)
6156	Ndrg2	0.634845	29811	NM_001145959	AI182517| AU040374| Ndr2| SYLD	N-myc downstream regulated gene 2
14709	Pigv	0.634602	230801	NM_001145955	B330013B03| D430024F16Rik	phosphatidylinositol glycan anchor biosynthesis, class V
4867	Itgb8	0.634208	320910	NM_177290	4832412O06Rik	integrin beta 8
20579	Coq9	0.633974	67914	NM_026452	2310005O14Rik| C78387	coenzyme Q9
15028	BC039966	0.633941	407793	NR_040670		cDNA sequence BC039966
12028	1110034G24Rik	0.633889	73747	NM_028637		RIKEN cDNA 1110034G24 gene
17158	Zxdc	0.633856	80292	NM_030260	A930012H20| B930086F11Rik| BC003332	ZXD family zinc finger C
15952	Cox6a1	0.633436	12861	NM_007748	VIaL	cytochrome c oxidase subunit VIa polypeptide 1
10908	Mrps2	0.633082	118451	NM_080452	1500019M10Rik	mitochondrial ribosomal protein S2
12344	Pkig	0.632991	18769	NM_001164055	PKIgamma	protein kinase inhibitor, gamma
21994	Cacna2d2	0.632966	56808	NM_001174050	a2d2| Cacna2d| du| mKIAA0558| td| torpid	calcium channel, voltage-dependent, alpha 2/delta subunit 2
10035	Tm7sf2	0.632806	73166	NM_028454	3110041O18Rik| ANG1| C14SR| Dhcr14	transmembrane 7 superfamily member 2
19551	1700008J07Rik	0.632742	629159	NR_024331	AW048743	RIKEN cDNA 1700008J07 gene
2826	Irgm2	0.632514	54396	NM_019440	AI481100| GTPI| Ifggd2| Iigp2	immunity-related GTPase family M member 2
10705	Atp5c1	0.632494	11949	NM_020615	1700094F02Rik	ATP synthase, H+ transporting, mitochondrial F1 complex, gamma polypeptide 1
10064	Kcnk4	0.632365	16528	NM_008431	MLZ-622| Tex40| TRAAK| TRAAKt	potassium channel, subfamily K, member 4
21100	Gm16853	0.632365	330902	NR_045742	4930565O14	predicted gene, 16853
10119	Lrrn4cl	0.632102	68852	NM_001013019	1110067I12Rik	LRRN4 C-terminal like
1530	Lace1	0.631861	215951	NM_145743	CG8520	lactation elevated 1
23039	Nrk	0.631714	27206	NM_013724	AA407323| AA409510| AI225895| AV168563| AW538185| Nesk	Nik related kinase
6191	Haus4	0.631551	219072	NM_145462	9430093H08Rik| AU016300| D14Ertd500e	HAUS augmin-like complex, subunit 4
2441	Rhbdd3	0.631461	279766	NM_001290492	Ptag	rhomboid domain containing 3
17405	Phb2	0.63146	12034	NM_007531	AU044498| BAP| Bap37| Bcap37| REA	prohibitin 2
5948	Phf7	0.63142	71838	NM_027949	1700006H01Rik| 1700010P14Rik| AI427892| AW555949	PHD finger protein 7
1605	Sowahc	0.631364	268301	NM_172939	4921515A04Rik| 9430099J10Rik| Ankrd57| C820004L04Rik	sosondowah ankyrin repeat domain family member C
9529	E230025N22Rik	0.631185	240216	NM_172831	EG240216	Riken cDNA E230025N22 gene
3812	Hexim2	0.631119	71059	NM_001130516	4933402L21Rik	hexamethylene bis-acetamide inducible 2
20660	Hsd11b2	0.631036	15484	NM_008289	11HSD2	hydroxysteroid 11-beta dehydrogenase 2
11942	1500011K16Rik	0.631002	67885	NR_015476		RIKEN cDNA 1500011K16 gene
5845	Nudt13	0.630717	67725	NM_026341	4933433B15Rik	nudix (nucleoside diphosphate linked moiety X)-type motif 13
7889	Gramd1c	0.630647	207798	NM_001172107	4921521N14Rik	GRAM domain containing 1C
11640	Commd9	0.63021	76501	NM_029635	1810029F08Rik| AA409293	COMM domain containing 9
20564	Mt1	0.630099	17748	NM_013602	Mt-1| MT-I	metallothionein 1
4123	Hexdc	0.63007	238023	NM_001001333	BC069960	hexosaminidase (glycosyl hydrolase family 20, catalytic domain) containing
16909	Fam13a	0.629975	58909	NM_153574	AI462012| D430015B01Rik| FAM13A1| Precm1	family with sequence similarity 13, member A
18980	Gab2	0.629952	14389	NM_010248	AI463667| D130058I17Rik| p97	growth factor receptor bound protein 2-associated protein 2
6228	Psme1	0.629946	19186	NM_011189	AW413925| PA28a	proteasome (prosome, macropain) activator subunit 1 (PA28 alpha)
3394	Dhrs11	0.629686	192970	NM_177564		dehydrogenase/reductase (SDR family) member 11
3728	Hsd17b1	0.629539	15485	NM_010475	17beta-HSD| 17HSDB1| E2DH| Hsd17ba	hydroxysteroid (17-beta) dehydrogenase 1
3602	Neurod2	0.629004	18013	NM_010895	bHLHa1| Ndrf	neurogenic differentiation 2
58	Ly96	0.628916	17087	NM_001159711	ESOP-1| MD-2| MD2	lymphocyte antigen 96
22215	Abhd5	0.628707	67469	NM_026179	1300003D03Rik| 2010002J10Rik| CDS| CGI-58| IECN5| NCIE2	abhydrolase domain containing 5
21990	Mapkapk3	0.628578	102626	NM_178907	3PK| AI874665| MAPKAP-K3| MAPKAP3| MapkKapk3| MK-3| MK3	mitogen-activated protein kinase-activated protein kinase 3
12349	Ywhab	0.628456	54401	NM_018753	1300003C17Rik	tyrosine 3-monooxygenase/tryptophan 5-monooxygenase activation protein, beta polypeptide
1258	Ppp2r5a	0.628421	226849	NM_144880	PR61alpha	protein phosphatase 2, regulatory subunit B', alpha
1701	Cisd1	0.628344	52637	NM_134007	AU043990| AW743335| D10Ertd214e| mitoNEET| Zcd1	CDGSH iron sulfur domain 1
16244	Agfg2	0.627975	231801	NM_001303271	A630095P14Rik| Hrbl| RAB-R| RABR	ArfGAP with FG repeats 2
11325	Clp1	0.627819	98985	NM_133840	AI462438| Heab	CLP1, cleavage and polyadenylation factor I subunit
21471	Dlat	0.627723	235339	NM_145614	6332404G05Rik| DLTA| PDC-E2	dihydrolipoamide S-acetyltransferase (E2 component of pyruvate dehydrogenase complex)
6214	Gm10364	0.627486	100151693	NR_073535	EG545052| ENSMUSG00000072492	predicted pseudogene 10364
15221	AI506816	0.627404	433855	NR_015554		expressed sequence AI506816
3290	Tmem199	0.627308	195040	NM_199199	AI316787| AI848469| R74819	transmembrane protein 199
1723	Ddt	0.627041	13202	NM_010027	C78655	D-dopachrome tautomerase
8532	Tmem8	0.626421	60455	NM_021793	AW490096| M83| Tmem8a	transmembrane protein 8 (five membrane-spanning domains)
20316	Isyna1	0.62629	71780	NM_023627	1300017C10Rik| AU018670	myo-inositol 1-phosphate synthase A1
3267	Nek8	0.625765	140859	NM_080849	4632401F23Rik| b2b1449Clo| jck	NIMA (never in mitosis gene a)-related expressed kinase 8
3566	Scrn2	0.625601	217140	NM_146027	AV001119| D11Moh48| SES2	secernin 2
2474	Tbrg4	0.625546	21379	NM_001130457	2310042P22Rik| AA120735| AA408001| AI527316| Cpr2| mKIAA0948| R74877| Tb-12	transforming growth factor beta regulated gene 4
12539	4921531C22Rik	0.624892	66730	NR_033782		RIKEN cDNA 4921531C22 gene
4237	Rsad2	0.624622	58185	NM_021384	2510004L01Rik| cig5| Vig1	radical S-adenosyl methionine domain containing 2
9187	Ndufv2	0.624613	72900	NM_001278415	2900010C23Rik	NADH dehydrogenase (ubiquinone) flavoprotein 2
10240	Gm5512	0.624516	433224	NR_002891_1	EG433224	predicted gene 5512
13545	Cyp2u1	0.624376	71519	NM_027816	8430436A10Rik	cytochrome P450, family 2, subfamily u, polypeptide 1
13020	Ubqln4	0.62422	94232	NM_033526	A1u| A1Up| AI663987| CIP75| UBIN	ubiquilin 4
4315	Dnajb9	0.623882	27362	NM_013760	AA408011| AA673251| AA673481| AW556981| ERdj4| Mdg1| mDj7	DnaJ heat shock protein family (Hsp40) member B9
11857	Ppip5k1	0.623793	327655	NM_178795	B430315C20Rik| Hisppd2a| mKIAA0377	diphosphoinositol pentakisphosphate kinase 1
8135	Atp5o	0.623324	28080	NM_138597	ATPO| D12Wsu28e| OSCP	ATP synthase, H+ transporting, mitochondrial F1 complex, O subunit
15922	Mmab	0.623296	77697	NM_029956	9130222L19Rik| ATR	methylmalonic aciduria (cobalamin deficiency) cblB type homolog (human)
15208	Pmpcb	0.622712	73078	NM_028431	3110004O18Rik| MPP11| MPPB| MPPP52	peptidase (mitochondrial processing) beta
7526	Gm1600	0.622527	381033	NR_126064	Gm1776	predicted gene 1600
20878	Dpep1	0.622218	13479	NM_007876	AI327012| MBD	dipeptidase 1 (renal)
3092	Cxcl16	0.622216	66102	NM_023158	0910001K24Rik| AV290116| b2b498Clo| BB024863| CXCL16v1| CXCL16v2| SR-PSOX| Zmynd15	chemokine (C-X-C motif) ligand 16
12524	Gm14322	0.621953	626802	NM_001243903	OTTMUSG00000016321	predicted gene 14322
865	Ivns1abp	0.621921	117198	NM_054102	1190004M08Rik| 1700126I16Rik| AA960440| HSPC068| mKIAA0850| ND1| Nd1-L| Nd1-S| NS-1| NS1-BP	influenza virus NS1A binding protein
23116	Ribc1	0.621743	66611	NM_025660	2610028I09Rik| W08639	RIB43A domain with coiled-coils 1
7416	Soat2	0.621722	223920	NM_146064	ACAT2| D15Wsu97e	sterol O-acyltransferase 2
15983	2410131K14Rik	0.621561	76792	NM_001081236		RIKEN cDNA 2410131K14 gene
273	Aox4	0.621513	71872	NM_023631	2310003G12Rik| Aoh2	aldehyde oxidase 4
3988	Mrpl38	0.621382	60441	NM_024177	1110036N21Rik| 4733401F03Rik| MRP-L3| R75240| Rpml3	mitochondrial ribosomal protein L38
14939	Gm13152	0.621303	195531	NM_001039209	OTTMUSG00000010671	predicted gene 13152
9169	Nudt12	0.621093	67993	NM_026497	0610016O18Rik	nudix (nucleoside diphosphate linked moiety X)-type motif 12
7153	Samm50	0.620843	68653	NM_178614	1110030L07Rik	SAMM50 sorting and assembly machinery component
11211	Fastkd1	0.620839	320720	NM_177244	5330408N05Rik| mKIAA1800	FAST kinase domains 1
12387	Ube2c	0.620566	68612	NM_026785	1110015A16Rik| D2Ertd695e	ubiquitin-conjugating enzyme E2C
3375	Ccl6	0.620504	20305	NM_009139	c10| MRP-1| Scya6	chemokine (C-C motif) ligand 6
4435	Timm9	0.620486	30056	NM_001024854	2810011L15Rik| Tim10a| Timm10	translocase of inner mitochondrial membrane 9
12590	Uckl1os	0.620405	100271841	NR_027289	Gm16119| OTTMUSG00000030649	uridine-cytidine kinase 1-like 1, opposite strand
3703	Jup	0.620346	16480	NM_010593	Ctnng| D930025P04Rik| PG	junction plakoglobin
10658	Prdx3	0.620261	11757	NM_007452	Aop1| AW822249| D0Tohi1| Ef2l| Mer5| Prx3| SP22| TDXM	peroxiredoxin 3
10823	Uap1l1	0.619826	227620	NM_001033293	5730445F03Rik	UDP-N-acteylglucosamine pyrophosphorylase 1-like 1
7719	St6gal1	0.619592	20440	NM_145933	AW742324| Siat1| St6gal| St6Gal-I| St6galI	beta galactoside alpha 2,6 sialyltransferase 1
22905	Cox7b	0.619587	66142	NM_025379	1100001F07Rik| 1110004F07Rik| C80563	cytochrome c oxidase subunit VIIb
4990	Hist1h2ao	0.619423	665433	NM_001177544		histone cluster 1, H2ao
11749	Aven	0.619188	74268	NM_028844	1700013A01Rik| 1700056A21Rik| mAven-L| mAven-S	apoptosis, caspase activation inhibitor
18860	Hddc3	0.617754	68695	NM_026812	1110033O09Rik| C86475| MESH1	HD domain containing 3
20576	Cx3cl1	0.617433	20312	NM_009142	AB030188| ABCD-3| AI848747| CX3C| Cxc3| D8Bwg0439e| Scyd1	chemokine (C-X3-C motif) ligand 1
14630	Ccdc28b	0.617377	66264	NM_025455	1110002E08Rik| 1810010N17Rik	coiled coil domain containing 28B
5874	Comtd1	0.616918	69156	NM_026965	1810030M08Rik| MT773	catechol-O-methyltransferase domain containing 1
6530	Lmo7	0.616756	380928	NM_201529	C78582| FBXO20| Gm914| mKIAA0858	LIM domain only 7
20782	Nudt7	0.61672	67528	NM_024446	1300007B24Rik| 2210404C19Rik	nudix (nucleoside diphosphate linked moiety X)-type motif 7
1747	Lss	0.616705	16987	NM_146006	2810025N20Rik| D10Ertd116e| Osc	lanosterol synthase
21467	Sdhd	0.615833	66925	NM_025848	3110001M13Rik| AVLL5809| C78570| PRO19626	succinate dehydrogenase complex, subunit D, integral membrane protein
19486	Sbk1	0.615271	104175	NM_145587	Sbk	SH3-binding kinase 1
5783	Gm3264	0.615271	100041306	NM_001242945_1	100041306	predicted gene 3264
1175	Lin9	0.615248	72568	NR_120498	2700022J23Rik| Bara| Lin-9| mLin-9| TGS| TGS1	lin-9 homolog (C. elegans)
3723	Stat5a	0.614827	20850	NM_011488	AA959963| STAT5	signal transducer and activator of transcription 5A
3420	Tubd1	0.614537	56427	NM_019756	4930550G19Rik| Tubd	tubulin, delta 1
18636	Hsd17b14	0.614428	66065	NM_025330	0610039E24Rik| Dhrs10| retSDR3	hydroxysteroid (17-beta) dehydrogenase 14
9280	Pkdcc	0.614335	106522	NM_134117	Adtk1| AI115348| AW548124| ESTM17| MAd1| Sgk493| Vlk| X83346	protein kinase domain containing, cytoplasmic
5529	Erap1	0.614037	80898	NM_030711	Arts1| ERAAP| PILSA| PILSAP	endoplasmic reticulum aminopeptidase 1
12715	Ndufb5	0.613655	66046	NM_025316	0610007D05Rik| AU015782| CI-SGDH| SGDH	NADH dehydrogenase (ubiquinone) 1 beta subcomplex, 5
8064	N6amt1	0.612927	67768	NM_001159331	5830445C04Rik| Hemk2| Pred28	N-6 adenine-specific DNA methyltransferase 1 (putative)
21561	Cox5a	0.612648	12858	NM_007747	AA959768| CcOX	cytochrome c oxidase subunit Va
19757	Cd151	0.612489	12476	NM_001111049	PETA-3| SFA-1| Tspan24	CD151 antigen
5667	Ccnb1	0.612349	268697	NM_172301	Ccnb1-rs1| Ccnb1-rs13| Cycb-4| Cycb-5| CycB1| Cycb1-rs1	cyclin B1
14119	Astn2	0.6121	56079	NM_019514	1d8| Astnl| bM452J22.1	astrotactin 2
3278	BC030499	0.612	216976	NM_001287206	BC037104| Sgk494	cDNA sequence BC030499
13629	Cyr61	0.611699	16007	NM_010516	AI325051| CCN1| Igfbp10	cysteine rich protein 61
19382	Psma1	0.611518	26440	NM_011965	alpha-type| C2| HC2| Pros-30	proteasome (prosome, macropain) subunit, alpha type 1
11269	Haglr	0.611462	102634678	NR_110445	6720416L17Rik| Hoxd-as1| Mdgt	Hoxd antisense growth associated long non-coding RNA
13553	Npnt	0.611332	114249	NM_001287101	1110009H02Rik| AA682063| AI314031| Nctn| POEM	nephronectin
10682	Phyh	0.611225	16922	NM_010726	AI256161| AI265699| Lnap1| PAHX	phytanoyl-CoA hydroxylase
292	Cdk15	0.611184	271697	NM_001033373	Als2cr7| Pftk2	cyclin-dependent kinase 15
13563	Bdh2	0.611134	69772	NM_001172055	1810026B04Rik| Dhrs6	3-hydroxybutyrate dehydrogenase, type 2
12253	Uqcc1	0.611129	56046	NR_024487	2310079L17Rik| 2410003P15Rik| 3110038N19Rik| Bfzb| Bfzp| Cbp3| Uqcc	ubiquinol-cytochrome c reductase complex assembly factor 1
10831	Ptgds	0.61054	19215	NM_008963	21kDa| L-PGDS| PGD2| PGDS| PGDS2| Ptgs3	prostaglandin D2 synthase (brain)
15997	Sds	0.610537	231691	NM_145565	4432411H13Rik| SDH	serine dehydratase
15791	Gbp9	0.610065	236573	NM_172777		guanylate-binding protein 9
19859	Prr36	0.609955	73072	NM_207203		proline rich 36
5411	BC052688	0.609836	432812	NR_028430		cDNA sequence BC052688
17667	Casc1	0.6098	320662	NM_177222	A230084G12Rik| Las1	cancer susceptibility candidate 1
18249	Cyp2t4	0.60964	384724	NM_001100184	Gm1448| Gm1450	cytochrome P450, family 2, subfamily t, polypeptide 4
477	Sp100	0.609589	20684	NM_013673	A430075G10Rik	nuclear antigen Sp100
4997	Hist1h2ah	0.609485	319168	NM_175659		histone cluster 1, H2ah
5915	Erc2	0.609402	238988	NM_177814	6430531D06| CAST| CAST1/ERC2| D14Ertd171e| ELKS2alpha	ELKS/RAB6-interacting/CAST family member 2
1516	Wasf1	0.609179	83767	NM_031877	AI195380| AI838537| Scar| WAVE| WAVE-1	WAS protein family, member 1
3475	Hlf	0.60907	217082	NM_172563	E230015K02Rik	hepatic leukemia factor
10888	Stkld1	0.608954	279029	NM_198628	Gm711| Sgk071	serine/threonine kinase-like domain containing 1
3746	Aoc2	0.608705	237940	NM_178932	RAO	amine oxidase, copper containing 2 (retina-specific)
520	Dgkd	0.608579	227333	NM_177646	AI841987| D330025K09| dgkd-2| DGKdelta	diacylglycerol kinase, delta
13214	Ctsk	0.607978	13038	NM_007802	AI323530| catK| MMS10-Q| Ms10q	cathepsin K
12862	Plch1	0.60792	269437	NM_001177732	BC042549| PLC-eta-1| PLCeta1| Plcl3	phospholipase C, eta 1
15692	Cdkl2	0.607738	53886	NM_016912	5330436L21Rik| AI505225| KKIAMRE| Kkm	cyclin-dependent kinase-like 2 (CDC2-related kinase)
21712	Ccnb2	0.607718	12442	NM_007630	CycB2	cyclin B2
11616	Prdm11	0.607691	100042784	NM_001177536	8030443D09Rik| AA163972| Gm707	PR domain containing 11
21673	Rbpms2	0.607528	71973	NM_028030	2400008B06Rik| AI316523	RNA binding protein with multiple splicing 2
3316	Tefm	0.6072	68550	NM_183275	1110002N22Rik	transcription elongation factor, mitochondrial
23	Sgk3	0.607008	170755	NM_133220	2510015P22Rik| A330005P07Rik| Cisk| fy| fz	serum/glucocorticoid regulated kinase 3
7667	Map6d1	0.606815	208158	NM_198599	A330066I15Rik	MAP6 domain containing 1
12620	C030034L19Rik	0.606815	320088	NR_015499	A130044O20Rik	RIKEN cDNA C030034L19 gene
16305	Snx8	0.605866	231834	NM_172277	B130023O14Rik	sorting nexin 8
8473	Eme2	0.605818	193838	NM_001163102	2810013J18Rik	essential meiotic structure-specific endonuclease subunit 2
19540	Sephs2	0.605672	20768	NM_009266	Sps2| Ysg3	selenophosphate synthetase 2
5094	Aldh5a1	0.60453	214579	NM_172532	6330403E24Rik| Ahd-1| Ahd1| D630032B01Rik| OTTMUSG00000000613| SSADH| Ssdh1	aldhehyde dehydrogenase family 5, subfamily A1
21191	Foxred1	0.604033	235169	NM_001291449	BC024806| TEG-23| Tex23	FAD-dependent oxidoreductase domain containing 1
4991	Hist1h2ap	0.604007	319171	NM_178185	ENSMUSG00000060262| Gm11276| OTTMUSG00000000448	histone cluster 1, H2ap
3240	Tusc5	0.603976	237858	NM_177709	C130069F04Rik| DSPB1| Lost1	tumor suppressor candidate 5
21838	Trim43c	0.603882	666731	NM_001177858	EG666731| Trim43	tripartite motif-containing 43C
11170	Itgb6	0.603878	16420	NM_001159564	2210409C20Rik| 4831415H04Rik	integrin beta 6
7822	Parp14	0.603178	547253	NM_001039530	1600029O10Rik| ARTD8| BC021340| CoaSt6| mKIAA1268	poly (ADP-ribose) polymerase family, member 14
21947	Ackr4	0.603119	252837	NM_145700	A630091E18Rik| CCBP2| CCR11| Ccrl1| CCX-CKR| CCX-CKR1| Cmkbrl1| PPR1| VSHK1	atypical chemokine receptor 4
21757	Lysmd2	0.602858	70082	NM_027309	2210402C18Rik| AV033872| AW538442	LysM, putative peptidoglycan-binding, domain containing 2
18458	Nudt19	0.602783	110959	NM_033080	D7Rp2| D7Rp2-r| D7Rp2-s| D7Rp2e| RP2-r| RP2-s	nudix (nucleoside diphosphate linked moiety X)-type motif 19
15366	Gm1673	0.602693	381633	NM_001033458		predicted gene 1673
22089	Elp6	0.602631	72341	NM_001081381	2610001P13Rik| 2610002I17Rik| AV159994| Tmem103	elongator acetyltransferase complex subunit 6
12227	Pxmp4	0.602595	59038	NM_021534	3010018P03Rik| Pmp24	peroxisomal membrane protein 4
478	A630001G21Rik	0.602507	319997	NM_177055		RIKEN cDNA A630001G21 gene
18016	Dmpk	0.602499	13400	NM_032418	DM| Dm15| DMK| MDPK| MT-PK	dystrophia myotonica-protein kinase
10565	Cnnm2	0.602355	94219	NM_001102471	Acdp2| AU015877| AW048635| Clp2	cyclin M2
14845	Sdhb	0.602284	67680	NM_023374	0710008N11Rik	succinate dehydrogenase complex, subunit B, iron sulfur (Ip)
7108	Srebf2	0.602122	20788	NM_033218	AI608257| bHLHd2| lop13| nuc| SREBP-2| SREBP2| SREBP2gc	sterol regulatory element binding factor 2
3154	Emc6	0.602085	66048	NM_025318	0610009E20Rik| 0610025L18Rik| Tmem93	ER membrane protein complex subunit 6
20399	Mcm5	0.601979	17218	NM_001302540	AA617332| AI324988| AL033333| Cdc46| Mcmd5| P1-CDC46	minichromosome maintenance complex component 5
4357	Nfkbia	0.601927	18035	NM_010907	AI462015| Nfkbi	nuclear factor of kappa light polypeptide gene enhancer in B cells inhibitor, alpha
19437	Pdzd9	0.6016	67983	NM_001040136	4930408O21Rik	PDZ domain containing 9
6018	Sh2d4b	0.601354	328381	NM_177816	A430109M18Rik| D030001E08	SH2 domain containing 4B
15915	Alkbh2	0.601131	231642	NM_175016	9530023G02| Abh2| AU016977| mABH2	alkB homolog 2, alpha-ketoglutarate-dependent dioxygenase
1888	Dot1l	0.601007	208266	NM_199322	A630076O07| AW907654| Dot1| KMT4| mDot1	DOT1-like, histone H3 methyltransferase (S. cerevisiae)
22143	Gpd1l	0.600999	333433	NM_175380	2210409H23Rik| D9Ertd660e	glycerol-3-phosphate dehydrogenase 1-like
5047	Hist1h2af	0.600599	319173	NM_175661	H2a-221	histone cluster 1, H2af
3930	Dnaic2	0.600455	432611	NM_001034878	C030015H18Rik| Dnai2| Gm728	dynein, axonemal, intermediate chain 2
1358	Gm20125	0.600239	100504235	NR_038020		predicted gene, 20125
17001	Lrrtm4	0.600051	243499	NM_001134743	7530419J18Rik| A230052N11	leucine rich repeat transmembrane neuronal 4
552	Mlph	0.599726	171531	NM_053015	2210418F23Rik| 5031433I09Rik| AW228792| D1Wsu84e| l(1)-3Rk| l1Rk3| ln| Slac-2a	melanophilin
22525	Dcaf12l2	0.599462	245403	NM_175539	A130007F10Rik| Wdr40c	DDB1 and CUL4 associated factor 12-like 2
5865	Plau	0.599394	18792	NM_008873	u-PA| uPA	plasminogen activator, urokinase
444	Utp14b	0.599365	195434	NM_001001981	4932411L21Rik| jsd	UTP14B small subunit processome component
12120	Cst3	0.59932	13010	NM_009976	CysC	cystatin C
2890	Flcn	0.599143	216805	NM_001271357	AU014660| B430214A04Rik| Bhd| FLCL	folliculin
6046	Ptger2	0.598974	19217	NM_008964	EP2| Ptgerep2	prostaglandin E receptor 2 (subtype EP2)
2453	Polm	0.598863	54125	NM_017401	AI462166| B230309I03Rik| Tdt-N	polymerase (DNA directed), mu
1047	Tomm40l	0.598565	641376	NM_001037170		translocase of outer mitochondrial membrane 40 homolog-like (yeast)
17435	Mrpl51	0.598559	66493	NM_025595	2610511M02Rik| CDA09| HSPC241| Mrp64	mitochondrial ribosomal protein L51
21468	Timm8b	0.598265	30057	NM_013897	Tim8b	translocase of inner mitochondrial membrane 8B
15551	Atp10d	0.597788	231287	NR_003966	9830145H18Rik| ATPVD| D5Buc24e	ATPase, class V, type 10D
21843	Mthfs	0.597369	107885	NM_026829	1110034I12Rik| 2310020H23Rik| AI119695	5, 10-methenyltetrahydrofolate synthetase
21377	Nlrx1	0.597289	270151	NM_178420	BC034204| NOD9	NLR family member X1
15074	Mrpl20	0.596953	66448	NM_025570	2610008D01Rik| 4930425I20Rik	mitochondrial ribosomal protein L20
18310	Sars2	0.596944	71984	NM_023637	2410015F05Rik| D7Ertd353e| SerRS| SerRSmt	seryl-aminoacyl-tRNA synthetase 2
281	Ndufb3	0.596683	66495	NM_025597	2700033I16Rik| CI-B12	NADH dehydrogenase (ubiquinone) 1 beta subcomplex 3
20830	Emc8-1190005i06rik	0.595818	105734727	NM_001308449		Emc8-1190005I06Rik readthrough
2301	Myl6b	0.595536	216459	NM_172259	5730437E04Rik| BC037527| MLC1SA	myosin, light polypeptide 6B
5054	Hist1h2ae	0.59551	319166	NM_178187	1190022L06	histone cluster 1, H2ae
4	Mrpl15	0.595181	27395	NR_033530	HSPC145| MRP-L7| Rpml7	mitochondrial ribosomal protein L15
17230	Bhlhe40	0.594634	20893	NM_011498	Bhlhb2| C130042M06Rik| Clast5| CR8| Dec1| Sharp2| Stra13| Stra14	basic helix-loop-helix family, member e40
11002	Eng	0.593631	13805	NM_001146350	AI528660| AI662476| CD105| Endo| S-endoglin	endoglin
819	Kif14	0.593409	381293	NM_001287179	D1Ertd367e| E130203M01	kinesin family member 14
16616	Chchd3	0.593219	66075	NM_025336	0610041L09Rik| 1700039J09Rik| AW558177	coiled-coil-helix-coiled-coil-helix domain containing 3
11256	Atp5g3	0.593148	228033	NM_001301721	6030447M23	ATP synthase, H+ transporting, mitochondrial F0 complex, subunit C3 (subunit 9)
10720	Itga8	0.59291	241226	NM_001001309	AI447669	integrin alpha 8
8474	Mrps34	0.592888	79044	NM_023260	0610007F04Rik| 5330430D13Rik| AV001970| Tce2	mitochondrial ribosomal protein S34
3268	Tlcd1	0.592853	68385	NM_001291237		TLC domain containing 1
18625	Ntf5	0.592818	78405	NM_198190	2900040K06Rik| AI462899| NT-4| NT-5| NT4| NT4/5| Ntf-5| Ntf4	neurotrophin 5
8722	H2-DMb1	0.592772	14999	NM_010387	AI385589| H-2Mb1| H2-Mb1	histocompatibility 2, class II, locus Mb1
1951	1190007I07Rik	0.592765	544717	NM_001135567		RIKEN cDNA 1190007I07 gene
18555	Clec11a	0.592733	20256	NM_009131	AW457320| Clecsf3| Scgf	C-type lectin domain family 11, member a
472	A530032D15Rik	0.592657	381287	NM_213615	Gm1888	RIKEN cDNA A530032D15Rik gene
2535	Tmem17	0.592598	103765	NM_153596	AI503894| AW049890	transmembrane protein 17
5798	Abhd6	0.592459	66082	NM_025341	0610041D24Rik| AA673485| AV065425	abhydrolase domain containing 6
4556	Pnma1	0.592201	70481	NM_027438	5730402C15Rik	paraneoplastic antigen MA1
2746	N4bp3	0.592025	212706	NM_145974	C330016O10Rik	NEDD4 binding protein 3
18175	Smg9	0.591964	71997	NM_028047	1500002O20Rik| AI429693| N28092	smg-9 homolog, nonsense mediated mRNA decay factor (C. elegans)
6245	Cideb	0.591842	12684	NM_009894	1110030C18Rik| AI790179| CIDE-B	cell death-inducing DNA fragmentation factor, alpha subunit-like effector B
4729	Clmn	0.591817	94040	NM_001040682	9330188N17Rik| AI428889| AI788815| mKIAA1188	calmin
5748	Hcn1	0.591777	15165	NM_010408	Bcng1| C630013B14Rik| HAC2	hyperpolarization-activated, cyclic nucleotide-gated K+ 1
15530	Limch1	0.590869	77569	NM_001001980	3732412D22Rik| mKIAA1102	LIM and calponin homology domains 1
11608	Pex16	0.590539	18633	NR_028114		peroxisomal biogenesis factor 16
22281	2010204K13Rik	0.590476	68355	NR_027924	0610010M13Rik| Cip7	RIKEN cDNA 2010204K13 gene
4203	Greb1	0.590051	268527	NM_001252071	5730583K22Rik| 9130004E13| AF180470| AU023194| mKIAA0575	gene regulated by estrogen in breast cancer protein
14415	Mmachc	0.589954	67096	NM_025962	1810037K07Rik	methylmalonic aciduria cblC type, with homocystinuria
13601	Unc5c	0.589948	22253	NM_001293561	B130051O18Rik| rcm| Unc5h3	unc-5 netrin receptor C
19457	Ndufab1	0.589297	70316	NM_028177	2210401F17Rik| 2310039H15Rik| 2610003B19Rik| 8kDa| 9130423F15Rik| ACP| CI-SDAP| SDAP	NADH dehydrogenase (ubiquinone) 1, alpha/beta subcomplex, 1
23213	Egfl6	0.589136	54156	NM_019397	Maeg	EGF-like-domain, multiple 6
13840	Ndufb6	0.588742	230075	NM_001033305	CI-B17| Gm137	NADH dehydrogenase (ubiquinone) 1 beta subcomplex, 6
15014	Tnfrsf25	0.588049	85030	NM_001291010	APO-3| DDR3| DR3| LARD| Tnfrsf12| TR3| TRAMP| Wsl| WSL-1| WSL-LR	tumor necrosis factor receptor superfamily, member 25
21776	Gsta1	0.587751	14857	NM_008181	Gst2-1| OTTMUSG00000031890	glutathione S-transferase, alpha 1 (Ya)
22144	Osbpl10	0.587599	74486	NM_148958	4933433D06Rik| C820004B04Rik| OPR-10| ORP-10	oxysterol binding protein-like 10
16192	Por	0.587091	18984	NM_008898	4933424M13Rik| CPR| CYPOR| P450R	P450 (cytochrome) oxidoreductase
4647	Galc	0.586924	14420	NM_008079	2310068B06Rik| A930008M05Rik| AW212969| AW413532| Gacy| twi| twitcher	galactosylceramidase
585	Rnpepl1	0.586902	108657	NM_181405	1110014H17Rik| AI894167	arginyl aminopeptidase (aminopeptidase B)-like 1
10822	Dpp7	0.58669	83768	NM_031843	Dpp2| DPPII| QPP	dipeptidylpeptidase 7
11574	Mtch2	0.58625	56428	NM_019758	2310034D24Rik| 4930539J07Rik| HSPC032	mitochondrial carrier 2
459	Col4a3	0.585988	12828	NM_007734	alpha3(IV)| [a]3(IV)	collagen, type IV, alpha 3
18411	Fxyd1	0.58575	56188	NM_194321	0610012C17Rik| 1110006M24Rik| Plm| Pml	FXYD domain-containing ion transport regulator 1
11301	Ssfa2	0.585305	70599	NM_080558	5730488C15Rik| CS-1| CS1| KRAP| mKIAA1927| SPAG13	sperm specific antigen 2
17050	Dysf	0.585034	26903	NM_001077694	2310004N10Rik| AI604795| D6Pas3	dysferlin
9269	Morn2	0.584655	378462	NM_194269	Mopt	MORN repeat containing 2
240	Osgepl1	0.58459	72085	NM_001285839	2610001M19Rik| AA416452	O-sialoglycoprotein endopeptidase-like 1
5524	Sdha	0.584449	66945	NM_023281	1500032O14Rik| 2310034D06Rik| 4921513A11| C81073| FP| SDH2| SDHF	succinate dehydrogenase complex, subunit A, flavoprotein (Fp)
18499	Gm2381	0.584375	100039706	NR_046214	100039706	predicted gene 2381
12370	Dbndd2	0.584374	52840	NM_001048227	1110017A21Rik| 2900022J10Rik| AU041050| AW048677| D2Bwg0891e| Nkip| R74724	dysbindin (dystrobrevin binding protein 1) domain containing 2
12239	Trp53inp2	0.584178	68728	NM_178111	1110029F20Rik| Tp53inp2	transformation related protein 53 inducible nuclear protein 2
17170	Chchd4	0.583293	72170	NM_133928	2410012P20Rik| 2810014D17Rik| AI838740	coiled-coil-helix-coiled-coil-helix domain containing 4
7028	Gcat	0.582898	26912	NM_013847	AI526977| Kbl	glycine C-acetyltransferase (2-amino-3-ketobutyrate-coenzyme A ligase)
20760	Mlkl	0.582885	74568	NM_029005	9130019I15Rik	mixed lineage kinase domain-like
6524	Klf5	0.582436	12224	NM_009769	4930520J07Rik| Bteb2| CKLF| IKLF	Kruppel-like factor 5
12975	Cd1d1	0.582072	12479	NM_007639	AI747460| CD1.1| Cd1a| Cd1d| Ly-38	CD1d1 antigen
13653	Ifi44	0.581235	99899	NM_133871	A430056A10Rik| AW261460| MTAP44| p44	interferon-induced protein 44
3410	2610027K06Rik	0.581037	69909	NR_077059		RIKEN cDNA 2610027K06 gene
10059	Ccdc88b	0.580849	78317	NM_001081291	2610041P08Rik| Ccdc88	coiled-coil domain containing 88B
1630	Pald1	0.58004	27355	NM_013753	mKIAA1274| MMPAL| Pald	phosphatase domain containing, paladin 1
15507	Tlr1	0.579769	21897	NM_001276445		toll-like receptor 1
10876	Fam69b	0.579683	56279	NM_019833	AB030186| AW209000| B230317C12Rik| PIP49	family with sequence similarity 69, member B
8709	H2-K2	0.579389	630499	NR_004446	EG630499| Gm7035| H-2K1| H-2K1K| H-2K2| H2-K1	histocompatibility 2, K region locus 2
4302	Agmo	0.579101	319660	NM_178767	A530016O06Rik| AI790538| Tmem195	alkylglycerol monooxygenase
10695	Echdc3	0.578897	67856	NM_024208	2310005D12Rik| AI662097	enoyl Coenzyme A hydratase domain containing 3
19037	Ucp2	0.578824	22228	NM_011671	Slc25a8	uncoupling protein 2 (mitochondrial, proton carrier)
12770	Larp1b	0.578662	214048	NM_001040399	1700108L22Rik| 4933421B21Rik| AA690246| Larp2	La ribonucleoprotein domain family, member 1B
5066	Hfe	0.578548	15216	NM_010424	MR2	hemochromatosis
18949	Tmem135	0.578503	72759	NM_028343	2810439K08Rik| AW319712| PMP52	transmembrane protein 135
21531	Etfa	0.578285	110842	NM_145615	2010200I21Rik| D9Ertd394e	electron transferring flavoprotein, alpha polypeptide
16232	Pop7	0.577729	74097	NM_028753	0610037N12Rik| AI852017| Rpp20	processing of precursor 7, ribonuclease P family, (S. cerevisiae)
19424	2610020H08Rik	0.577682	434234	NM_028129		RIKEN cDNA 2610020H08 gene
16029	Acad12	0.577345	338350	NM_178799	9330129D05Rik	acyl-Coenzyme A dehydrogenase family, member 12
144	Cox5b	0.577286	12859	NM_009942		cytochrome c oxidase subunit Vb
9968	Actn3	0.577186	11474	NM_013456		actinin alpha 3
5989	Anxa8	0.57693	11752	NM_013473	AI466995| Anx8	annexin A8
12478	Rbm38	0.576868	56190	NM_019547	Rnpc1| Seb4| Seb4l	RNA binding motif protein 38
3081	Slc16a11	0.576627	216867	NM_153081	AB041591| MCT 11| MNCb-2717	solute carrier family 16 (monocarboxylic acid transporters), member 11
6328	Kcnrg	0.576598	328424	NM_001039105	Clld4| E030012H22Rik| Gm745	potassium channel regulator
21470	Pih1d2	0.576398	72614	NM_028300	2700059L22Rik	PIH1 domain containing 2
13630	Ddah1	0.576368	69219	NM_026993	2410006N07Rik| 2510015N06Rik| AI987801| AW050362	dimethylarginine dimethylaminohydrolase 1
11946	Gm14005	0.576348	100043424	NR_028589	OTTMUSG00000015351	predicted gene 14005
1892	Jsrp1	0.576321	71912	NM_028001	2300003C06Rik| 2310032K21Rik| JP-45| JP45	junctional sarcoplasmic reticulum protein 1
4579	Dlst	0.576198	78920	NM_030225	1600017E01Rik| 4632413C10Rik| 4930529O08Rik| DLTS	dihydrolipoamide S-succinyltransferase (E2 component of 2-oxo-glutarate complex)
4829	Adssl1	0.576198	11565	NM_007421	Adss| Adss1| AI528595	adenylosuccinate synthetase like 1
8985	Nfkbie	0.576044	18037	NM_001304956	I-kappa-B-epsilon| IkB-E| ikB-epsilon| IKBE| NF-kappa-BIE	nuclear factor of kappa light polypeptide gene enhancer in B cells inhibitor, epsilon
14949	Plod1	0.575978	18822	NM_011122	2410042F05Rik| AI854890| AV007929| Lh1| Plod	procollagen-lysine, 2-oxoglutarate 5-dioxygenase 1
18317	Ech1	0.575247	51798	NM_016772	AA617331	enoyl coenzyme A hydratase 1, peroxisomal
15666	Cox18	0.575246	231430	NM_001033310	BC038311	cytochrome c oxidase assembly protein 18
10993	Ptges2	0.575085	96979	NM_133783	0610038H10Rik| C79137| Gbf1| Mpges2| Pges2	prostaglandin E synthase 2
20743	Vac14	0.575022	234729	NM_146216	AA959718| BC032215| D8Wsu151e| ingls| Tax1bp2| Trx	Vac14 homolog (S. cerevisiae)
21749	Myo5c	0.574373	208943	NM_001081322	9130003O20Rik| BB085560| C330029I24	myosin VC
22928	Hmgn5	0.573793	50887	NM_016710	GARP45| NBP-45| Nsbp1	high-mobility group nucleosome binding domain 5
8840	H2-T24	0.573496	15042	NM_008207	H-2T24	histocompatibility 2, T region locus 24
12665	Cp	0.573394	12870	NM_001276250	D3Ertd555e	ceruloplasmin
17668	Lyrm5	0.573369	67636	NM_001163628	4930469P12Rik| AL022899| Ghiso	LYR motif containing 5
18768	BC046251	0.573232	407810	NR_131060		cDNA sequence BC046251
4977	Hist1h2ai	0.573069	319191	NM_178182	H2a-291A	histone cluster 1, H2ai
11020	Angptl2	0.572774	26360	NM_011923	AI593246| Arp2| AW260363	angiopoietin-like 2
15943	Cabp1	0.572643	29867	NM_013879	caldendrin	calcium binding protein 1
6675	Cdh10	0.571936	320873	NM_009865	A830016G23Rik| C030003B10Rik| C030011H18Rik	cadherin 10
5178	Eci3	0.571561	69123	NM_026947	1810022C23Rik| Kseg2	enoyl-Coenzyme A delta isomerase 3
21613	Uaca	0.57155	72565	NM_028283	2700059D02Rik| nucling	uveal autoantigen with coiled-coil domains and ankyrin repeats
19786	H19	0.571527	14955	NR_130974	AI747191	H19, imprinted maternally expressed transcript
6970	C030006K11Rik	0.57139	223665	NM_145472	1110033I13Rik	RIKEN cDNA C030006K11 gene
12094	A930019D19Rik	0.571066	77806	NR_040619		RIKEN cDNA A930019D19 gene
1720	Ggt5	0.571053	23887	NM_011820	AI551243| GGL| GGT-REL| Ggtla1	gamma-glutamyltransferase 5
22018	Uba7	0.570857	74153	NM_023738	1300004C08Rik| Ube1l	ubiquitin-like modifier activating enzyme 7
9567	Pcdhb10	0.570453	93881	NM_053135	Pcdhb5D| PcdhbJ	protocadherin beta 10
13265	Nudt17	0.569544	78373	NM_030094	2410015C20Rik	nudix (nucleoside diphosphate linked moiety X)-type motif 17
4887	Akr1c12	0.569346	622402	NM_013777	AI266976| Akra	aldo-keto reductase family 1, member C12
1297	Akap12	0.569103	83397	NM_031185	AI317366| Srcs5| SSeCKS| Tsga12	A kinase (PRKA) anchor protein (gravin) 12
11979	Cpxm1	0.568927	56264	NM_019696	AA986902| Cpx-1| Cpx1| Cpxm	carboxypeptidase X 1 (M14 family)
76	Mcm3	0.56867	17215	NM_008563	AL033361| C80350| Mcmd| P1| p1.m	minichromosome maintenance complex component 3
14330	Orc1	0.568378	18392	NM_011015	AA545195| MmORC1| Orc1l	origin recognition complex, subunit 1
672	Tmem177	0.567933	66343	NM_175106	2300008B03Rik	transmembrane protein 177
17420	Ptms	0.567583	69202	NM_026988	2610009E16Rik	parathymosin
13853	Aqp7	0.567474	11832	NM_007473	AQP7L| AQPap	aquaporin 7
3756	Brca1	0.566866	12189	NM_009764		breast cancer 1, early onset
20808	Osgin1	0.566573	71839	NM_027950	1700012B18Rik| Okl38	oxidative stress induced growth inhibitor 1
1594	Smpdl3a	0.56656	57319	NM_020561	0610010C24Rik| AI529588| ASM3A| ASML3| ASML3A	sphingomyelin phosphodiesterase, acid-like 3A
9473	Stard4	0.566059	170459	NM_133774	4632419C16Rik| 9030213J02Rik| AA517649| AW324468	StAR-related lipid transfer (START) domain containing 4
4047	C1qtnf1	0.565958	56745	NM_001204129	1600017K21Rik| CTRP1| Zsig37	C1q and tumor necrosis factor related protein 1
4272	Prkar2b	0.565813	19088	NM_011158	AI451071| AW061005| Pkarb2| PKARIIbeta| RII(beta)	protein kinase, cAMP dependent regulatory, type II beta
17089	1600020E01Rik	0.565756	72012	NR_037960		RIKEN cDNA 1600020E01 gene
12778	Pcdh10	0.565597	18526	NM_001098172	6430521D13Rik| 6430703F07Rik| mKIAA1400| OL-pc	protocadherin 10
5926	Tkt	0.565489	21881	NM_009388	p68	transketolase
5055	Hist1h2bg	0.565326	319181	NM_178196		histone cluster 1, H2bg
20522	Zfp423	0.565221	94187	NM_033327	ataxia1| Ebfaz| mKIAA0760| nur12| Roaz| Zfp104| Znf423	zinc finger protein 423
6983	Apol9a	0.565184	223672	NM_001162883		apolipoprotein L 9a
8402	Tnfrsf12a	0.565071	27279	NM_001161746	AI255180| C87282| Fn14| HPIP| TWEAK-R| TweakR	tumor necrosis factor receptor superfamily, member 12a
15468	Ppargc1a	0.564759	19017	NM_008904	A830037N07Rik| ENSMUSG00000079510| Gm11133| PGC-1| Pgc-1alpha| Pgc1| Pgco1| PPARGC-1-alpha| Ppargc1	peroxisome proliferative activated receptor, gamma, coactivator 1 alpha
3354	Slfn10-ps	0.564664	237887	NR_073523	mFLJ00257| Slfn10	schlafen 10, pseudogene
20569	Nlrc5	0.56423	434341	NM_001033207	AI451557| AK220210| NOD27	NLR family, CARD domain containing 5
11975	Snord110	0.564049	100217452	NR_028547	MBII-55	small nucleolar RNA, C/D box 110
12365	Matn4	0.564008	17183	NM_001252563	matrilin-4	matrilin 4
6591	Clybl	0.563961	69634	NM_029556	0610033J05Rik| 2310014M14Rik| AI256068| Clb	citrate lyase beta like
5186	Fars2	0.563768	69955	NM_024274	Fars1| pheRS	phenylalanine-tRNA synthetase 2 (mitochondrial)
10992	Lcn2	0.563748	16819	NM_008491	24p3| AW212229| Sip24	lipocalin 2
19566	Hsd3b7	0.563711	101502	NM_001040684	AI195443| BB098564	hydroxy-delta-5-steroid dehydrogenase, 3 beta- and steroid delta-isomerase 7
1097	Crp	0.563483	12944	NM_007768	AI255847	C-reactive protein, pentraxin-related
4890	Akr1c21	0.563434	77337	NM_029901	9430025F20Rik| AI315367	aldo-keto reductase family 1, member C21
12926	Etfdh	0.562515	66841	NM_025794	0610010I20Rik| AV001013	electron transferring flavoprotein, dehydrogenase
1513	Ddo	0.562397	70503	NM_027442	5330420D20Rik| 5730402C02Rik| AI467244	D-aspartate oxidase
9707	March3	0.562207	320253	NM_177115	6330411I15Rik| A530081L18Rik| AI843639| MARCH-III	membrane-associated ring finger (C3HC4) 3
5889	Ppif	0.562196	105675	NM_134084	AW457192| CyP-D| CyP-F| CypD| PPIase	peptidylprolyl isomerase F (cyclophilin F)
8433	Ccnf	0.561742	12449	NM_007634	CycF| Fbxo1	cyclin F
18895	4933406J10Rik	0.56159	77800	NR_046004	A930009F24Rik	RIKEN cDNA 4933406J10 gene
838	Gm4788	0.56144	214403	NM_001160304	Cfhrc| EG214403	predicted gene 4788
15932	2610524H06Rik	0.561347	330173	NM_181075		RIKEN cDNA 2610524H06 gene
20831	1190005I06Rik	0.561221	68918	NM_197988		RIKEN cDNA 1190005I06 gene
11005	Sh2d3c	0.560847	27387	NR_045535	Chat| Nsp3| Shep1	SH2 domain containing 3C
22973	Xkrx	0.560847	331524	NM_183319	A630026F04	X-linked Kx blood group related, X-linked
6304	Phf11d	0.560505	219132	NM_199015	D14Ertd668e| Phf11| Phf11l	PHD finger protein 11D
1927	Mfsd12	0.560381	73822	NM_028657	C19orf28| F630110N24Rik| Wdt1	major facilitator superfamily domain containing 12
16987	Suclg1	0.560219	56451	NM_019879	1500000I01Rik| Sucla1	succinate-CoA ligase, GDP-forming, alpha subunit
20744	Mtss1l	0.56016	244654	NM_198625	ABBA	metastasis suppressor 1-like
18953	Me3	0.55994	109264	NM_181407	1700020C08Rik| B230207H15Rik	malic enzyme 3, NADP(+)-dependent, mitochondrial
21073	Col5a3	0.559928	53867	NM_016919		collagen, type V, alpha 3
8955	Mut	0.55981	17850	NM_008650	D230010K02Rik| Mcm	methylmalonyl-Coenzyme A mutase
10142	Fads2	0.559681	56473	NM_019699	2900042M13Rik| Fadsd2	fatty acid desaturase 2
12243	Acss2os	0.559174	74945	NR_040613	4930471I20Rik	acyl-CoA synthetase short-chain family member 2, opposite strand
4034	Afmid	0.559063	71562	NM_027827	9030621K19Rik| Ammd| FKF| formylase| Kf| KFA	arylformamidase
15070	Atad3a	0.559007	108888	NM_179203	2400004H09Rik| Atad3| mKIAA1273| Tob3	ATPase family, AAA domain containing 3A
16595	Klhdc10	0.558934	76788	NM_029742	2410127E18Rik| AI593221| mKIAA0265	kelch domain containing 10
21198	Pus3	0.558674	67049	NM_023292	2610020J05Rik| 5730412F04Rik	pseudouridine synthase 3
16266	Mblac1	0.558457	330216	NM_177878		metallo-beta-lactamase domain containing 1
8438	Eci1	0.558204	13177	NM_010023	Dci| eci	enoyl-Coenzyme A delta isomerase 1
8981	Spats1	0.558065	71020	NM_027649	1700011H05Rik| 4933400B06Rik| Daip2| Ddip| Srsp1	spermatogenesis associated, serine-rich 1
18361	Wdr62	0.557863	233064	NM_146186	2310038K02Rik	WD repeat domain 62
14149	Gm5860	0.557531	545641	NR_040659	EG545641	predicted gene 5860
3399	Myo19	0.557132	66196	NM_025414	1110055A02Rik| Myohd1	myosin XIX
12676	Ect2	0.557	13605	NM_007900	AI528536| mKIAA4037	ect2 oncogene
19751	Slc25a22	0.556935	68267	NM_026646	1300006L01Rik| AI060884| Gc1	solute carrier family 25 (mitochondrial carrier, glutamate), member 22
16011	Oas1b	0.556696	23961	NR_003507	Flv| L1| Mmu-L1| Oas1| Oias-2| Oias2| Wnv	2'-5' oligoadenylate synthetase 1B
15923	Mvk	0.556384	17855	NM_023556	2310010A05Rik| AI256848| AI414037| MK	mevalonate kinase
4839	Nudt14	0.556327	66174	NM_025399	1110030M18Rik| UGPPase	nudix (nucleoside diphosphate linked moiety X)-type motif 14
12014	Erv3	0.556081	71995	NM_001166206	1600014E20Rik| AA389086| AI426069| AI448024| D19349	endogenous retroviral sequence 3
19567	Stx1b	0.55578	56216	NM_024414	Stx1b2| Stx1bl| Syn1b	syntaxin 1B
2550	Rel	0.555613	19696	NM_009044	c-Rel	reticuloendotheliosis oncogene
8128	Dnajc28	0.55552	246738	NM_138664	BC020175| ORF28	DnaJ heat shock protein family (Hsp40) member C28
3810	Acbd4	0.555097	67131	NM_025988	2010009P05Rik| 2010015A21Rik| AI849317	acyl-Coenzyme A binding domain containing 4
17623	Mgst1	0.554305	56615	NM_019946	1500002K10Rik| Gst	microsomal glutathione S-transferase 1
8273	Sod2	0.553742	20656	NM_013671	MnSOD| Sod-2	superoxide dismutase 2, mitochondrial
21738	2310009A05Rik	0.553442	66364	NR_040377	5031420N21Rik	RIKEN cDNA 2310009A05 gene
19061	Tomt	0.553143	791260	NM_001282088	Comt2| F930017I19Rik	transmembrane O-methyltransferase
13618	Clca3a1	0.552869	12722	NM_009899	Cacc| Clca1	chloride channel accessory 3A1
13057	Flad1	0.552796	319945	NM_177041	A930017E24Rik| Pp591	flavin adenine dinucleotide synthetase 1
20238	Ddx60	0.552646	234311	NM_001293783	9830118M07	DEAD (Asp-Glu-Ala-Asp) box polypeptide 60
10062	Esrra	0.55264	26379	NM_007953	Err1| ERRalpha| Estrra| Nr3b1	estrogen related receptor, alpha
17438	E130112N10Rik	0.552364	78668	NR_015604	5830448L21Rik| 9530059J11Rik	RIKEN cDNA E130112N10 gene
10942	Endog	0.551315	13804	NM_007931		endonuclease G
15572	Dancr	0.551153	70036	NR_015531	2700023E23Rik	differentiation antagonizing non-protein coding RNA
8040	Nrip1	0.551082	268903	NM_173440	6030458L20Rik| 8430438I05Rik| 9630050P12| AA959574| AW456757| RIP140	nuclear receptor interacting protein 1
985	Dpt	0.550929	56429	NM_019759	1810032B19Rik| 5033416F05Rik| EQ-1| Eq1	dermatopontin
13000	Iqgap3	0.549491	404710	NM_001033484	AI593484| D030034H08	IQ motif containing GTPase activating protein 3
250	Coq10b	0.549261	67876	NM_026424	1500041J02Rik| 1700030I21Rik| 9530077A17Rik| AV002237| AW742641	coenzyme Q10B
11960	Gm14023	0.549167	100503468	NR_040371	OTTMUSG00000015408	predicted gene 14023
12074	Pet117	0.548989	100048644	NM_001164813	Gm20571	PET117 homolog
857	Ptgs2os2	0.548869	102639566	NR_110420	Gm26687| Linc-cox2| Lincrna-cox2	prostaglandin-endoperoxide synthase 2, opposite strand 2
21946	Acad11	0.548315	102632	NM_175324	5730439E10Rik| AI987948	acyl-Coenzyme A dehydrogenase family, member 11
7813	E130310I04Rik	0.548027	278725	NR_045723	A930019C19Rik	RIKEN cDNA E130310I04 gene
17777	Isoc2a	0.547502	664994	NM_001101598	Isoc2	isochorismatase domain containing 2a
21513	Sh2d7	0.547493	244885	NM_173778	4933412E14Rik	SH2 domain containing 7
4018	Mettl23	0.547375	74319	NM_028865	1110005A03Rik| 1500035B17Rik| 4933424L15Rik	methyltransferase like 23
21777	Gm3776	0.547324	100042295	NM_001243092	100042295	predicted gene 3776
4795	Ankrd9	0.547259	74251	NM_175207	2500003O20Rik	ankyrin repeat domain 9
4263	Dld	0.547056	13382	NM_007861		dihydrolipoamide dehydrogenase
20919	Trim67	0.546981	330863	NM_198632	D130049O21Rik| TNL	tripartite motif-containing 67
10398	Ifit3b	0.546887	667370	NM_001005858	I830012O16Rik	interferon-induced protein with tetratricopeptide repeats 3B
4981	Hist1h4k	0.546652	319160	NM_178211		histone cluster 1, H4k
14097	Hdhd3	0.54657	72748	NM_024257	2810435D12Rik	haloacid dehalogenase-like hydrolase domain containing 3
6027	Gm10377	0.546183	100042055	NM_001244671	ENSMUSG00000072606	predicted gene 10377
3562	Pnpo	0.545898	103711	NM_134021	AI415282	pyridoxine 5'-phosphate oxidase
17443	Scnn1a	0.545749	20276	NM_011324	ENaC| mENaC| SCNEA| Scnn1	sodium channel, nonvoltage-gated 1 alpha
9921	Aldh3b3	0.545581	73458	NM_028545	1700055N04Rik	aldehyde dehydrogenase 3 family, member B3
966	Fmo3	0.544963	14262	NM_008030	AW111792	flavin containing monooxygenase 3
11263	Hoxd10	0.54465	15430	NM_013554	AI385591| AI874987| Hox-4.5| Hox-5.3	homeobox D10
20164	AY512931	0.54459	434310	NR_033588		cDNA sequence AY512931
20109	Gsr	0.543449	14782	NM_010344	AI325518| D8Ertd238e| Gr-1| Gr1	glutathione reductase
57	Tmem70	0.543193	70397	NM_027415	1110020A09Rik| 2210416J16Rik	transmembrane protein 70
14565	Stk40	0.542664	74178	NM_028800	2310004N11Rik| AI428792	serine/threonine kinase 40
15401	Grpel1	0.542496	17713	NM_024478	AA408748| mt-GrpE#1| mt-Grpel1	GrpE-like 1, mitochondrial
3524	Phb	0.542165	18673	NM_008831	Bap32	prohibitin
21370	C1qtnf5	0.541858	235312	NM_145613	Ctrp5	C1q and tumor necrosis factor related protein 5
3715	Dhx58	0.541684	80861	NM_030150	B430001I08Rik| D11Lgp2e| Lgp2| LPG2| RLR-3	DEXH (Asp-Glu-X-His) box polypeptide 58
11818	Ndufaf1	0.541566	69702	NM_027175	2410001M24Rik| CGI-65| CIA30	NADH dehydrogenase (ubiquinone) 1 alpha subcomplex, assembly factor 1
18224	Bckdha	0.540924	12039	NM_007533		branched chain ketoacid dehydrogenase E1, alpha polypeptide
1050	Ndufs2	0.540844	226646	NM_153064	CI-49kD	NADH dehydrogenase (ubiquinone) Fe-S protein 2
15303	Kcnk3	0.540775	16527	NM_010608	cTBAK-1| TASK| Task-1	potassium channel, subfamily K, member 3
22695	Idh3g	0.540614	15929	NM_008323		isocitrate dehydrogenase 3 (NAD+), gamma
3217	Rilp	0.53978	280408	NM_001029938	AI835553| Gm857	Rab interacting lysosomal protein
16815	Halr1	0.539752	102635415	NR_110440	Gm15055| Haunt| linc-Evx1| linc-Hoxa1| linc1547| Linchoxa1| OTTMUSG00000018881	Hoxa adjacent long noncoding RNA 1
17611	Smco3	0.539671	654818	NM_001039558	C030030A07Rik	single-pass membrane protein with coiled-coil domains 3
3032	Efnb3	0.539591	13643	NM_007911	EFL-6| ELF-3| Elk-L3| Epl8| LERK-8| NLERK-2	ephrin B3
8315	Lix1	0.539558	66643	NM_025681	5730466L18Rik	limb and CNS expressed 1
1310	Oprm1	0.539109	18390	NM_001302796	M-OR-1| MOP-R| mor| MOR-1| MOR-1O| muOR| Oprm	opioid receptor, mu 1
1111	Pydc4	0.538871	623121	NM_001177349	E030037K03Rik| E430029J22Rik	pyrin domain containing 4
3835	Myl4	0.538698	17896	NM_010858	ALC1| AMLC| ELC| ELC1a| GT1| MLC1a| Myla	myosin, light polypeptide 4
9337	2700099C18Rik	0.538148	77022	NR_024720	9430041D22Rik	RIKEN cDNA 2700099C18 gene
754	Pik3c2b	0.537362	240752	NM_001099276	C330011J12Rik| Gm199| PI3K-C2beta| PI3KC2beta	phosphoinositide-3-kinase, class 2, beta polypeptide
22179	Cx3cr1	0.5371	13051	NM_009987		chemokine (C-X3-C motif) receptor 1
10985	Uck1	0.537017	22245	NM_011675	Umpk| URK1	uridine-cytidine kinase 1
18476	Zfp619	0.536831	70227	NM_001004139	3000002G13Rik	zinc finger protein 619
20869	Acsf3	0.536286	257633	NM_144932	BB101783	acyl-CoA synthetase family member 3
17349	Mical3	0.536076	194401	NM_001270475	C130040D16Rik| Mical-3| mKIAA1364	microtubule associated monooxygenase, calponin and LIM domain containing 3
17291	Rho	0.535837	212541	NM_145383	Noerg1| Opn2| Ops| RP4	rhodopsin
316	Ino80dos	0.53521	100380944	NR_045915	Gm11602| OTTMUSG00000002611	INO80 complex subunit D, opposite strand
7376	Nr4a1	0.534739	15370	NM_010444	Gfrp| GFRP1| Hbr-1| Hbr1| Hmr| N10| NGFI-B| NGFIB| NP10| nur77| TIS1| TR3	nuclear receptor subfamily 4, group A, member 1
10909	Gbgt1	0.534414	227671	NM_139197	Fgs| Fs	globoside alpha-1,3-N-acetylgalactosaminyltransferase 1
13055	Gm15417	0.53391	545539	NR_040403	ENSMUSG00000074466| OTTMUSG00000021274	predicted gene 15417
9616	Spry4	0.533279	24066	NM_011898	A030006O18Rik| sprouty4	sprouty homolog 4 (Drosophila)
234	Hibch	0.533241	227095	NM_146108	2610509I15Rik| HIBYL-COA-H	3-hydroxyisobutyryl-Coenzyme A hydrolase
5799	Rpp14	0.53306	67053	NM_025938	2610511E03Rik| AA682089	ribonuclease P 14 subunit
16655	1110001J03Rik	0.533053	66117	NM_025363	Fmc1	RIKEN cDNA 1110001J03 gene
16670	Ndufb2	0.533042	68198	NM_026612	1810011O01Rik| 8kDa| AGGG| AI325567| CI-AGGG	NADH dehydrogenase (ubiquinone) 1 beta subcomplex, 2
8066	Rwdd2b	0.53302	53858	NM_016924	ORF5	RWD domain containing 2B
11653	Cat	0.532894	12359	NM_009804	2210418N07| Cas-1| Cas1| Cs-1	catalase
11267	Hoxd3	0.532862	15434	NM_010468	Hox-4.1| Hox-5.5	homeobox D3
9636	Stk32a	0.532377	269019	NM_178749	A930015B13Rik| YANK1	serine/threonine kinase 32A
13574	1700030L20Rik	0.532206	70055	NR_040592		RIKEN cDNA 1700030L20 gene
21724	Cgnl1	0.532053	68178	NM_026599	4933421H10Rik| 9930020M10Rik| AI503810| Jacop	cingulin-like 1
1141	Fh1	0.532004	14194	NM_010209	Fh| Fh-1	fumarate hydratase 1
1560	Grik2	0.531221	14806	NM_001111268	AW124492| GluK2| Glur-6| Glur6| Glurbeta2	glutamate receptor, ionotropic, kainate 2 (beta 2)
20409	Ednra	0.530939	13617	NM_010332	ET-AR| ETa| Gpcr10	endothelin receptor type A
5269	Ecm2	0.530715	407800	NM_001012324	9030618O22Rik| BC065151| tenonectin	extracellular matrix protein 2, female organ and adipocyte specific
4506	Rad51b	0.530713	19363	NM_009014	AI553500| mREC2| R51H2| Rad51l1	RAD51 paralog B
4561	Coq6	0.530481	217707	NM_172582	5930427M12Rik| AW742344	coenzyme Q6 monooxygenase
10604	Gpam	0.530037	14732	NM_008149	GPAT| GPAT1	glycerol-3-phosphate acyltransferase, mitochondrial
4153	Fam228b	0.53003	207921	NM_175431	A830093I24Rik	family with sequence similarity 228, member B
6487	Dnajc15	0.529931	66148	NM_025384	1110003P16Rik| Dnajd1	DnaJ heat shock protein family (Hsp40) member C15
1731	Mmp11	0.529809	17385	NM_001306184	MMP-11| SL-3| ST3| Stmy3	matrix metallopeptidase 11
13544	Hadh	0.529747	15107	NM_008212	AA409008| AU019341| AW742602| Hadhsc| HCDH| Schad	hydroxyacyl-Coenzyme A dehydrogenase
19640	Adam12	0.529662	11489	NM_007400	Mltna	a disintegrin and metallopeptidase domain 12 (meltrin alpha)
5504	Mrpl36	0.529548	94066	NM_053163	AI646041	mitochondrial ribosomal protein L36
15294	Hadha	0.529289	97212	NM_178878	C77020| Mtpa	hydroxyacyl-Coenzyme A dehydrogenase/3-ketoacyl-Coenzyme A thiolase/enoyl-Coenzyme A hydratase (trifunctional protein), alpha subunit
6229	Emc9	0.529268	85308	NM_033146	1500005A01Rik| Cgi112| Fam158a	ER membrane protein complex subunit 9
17262	Fancd2	0.529194	211651	NM_001033244	2410150O07Rik| AU015151| BB137857| FA-D2| FA4| FACD| FAD| FANCD	Fanconi anemia, complementation group D2
1380	Map3k5	0.529165	26408	NM_008580	7420452D20Rik| ASK| ASK1| MAPKKK5| Mekk5	mitogen-activated protein kinase kinase kinase 5
15946	Coq5	0.528991	52064	NM_026504	1810014G04Rik| D5Ertd33e	coenzyme Q5 methyltransferase
14956	Draxin	0.528949	70433	NM_027426	2610109H07Rik| neucrin	dorsal inhibitory axon guidance protein
2239	B4galnt1	0.528749	14421	NR_045166	4933429D13Rik| Gal-NAc-T| Galgt1| GalNAc-T| GalNAcT| Ggm-2| Ggm2	beta-1,4-N-acetyl-galactosaminyl transferase 1
8740	Gpsm3	0.528336	106512	NM_134116	AA960287| AGS4	G-protein signalling modulator 3 (AGS3-like, C. elegans)
1466	Gm3258	0.52818		NM_011509
5305	Sfxn1	0.528161	14057	NM_027324	2810002O05Rik| A930015P12Rik| f	sideroflexin 1
17329	Adipor2	0.527911	68465	NM_197985	1110001I14Rik| ADCR2| AI115388| AW554121| D6Ucla1e| Paqr2	adiponectin receptor 2
4176	Ttc32	0.527883	75516	NM_029321	1700013G20Rik	tetratricopeptide repeat domain 32
12455	A630075F10Rik	0.527287	100043910	NR_033634	100043910| 4831414D02| Gm4722	RIKEN cDNA A630075F10 gene
5742	Itga1	0.527261	109700	NM_001033228	CD49A| E130012M19Rik| Vla1	integrin alpha 1
16960	Immt	0.526706	76614	NM_029673	1700082C19Rik| D830041H16Rik| HMP| P87| P87/89| P89	inner membrane protein, mitochondrial
524	Ugt1a7c	0.526457	394432	NM_201642	A10'| A13| Ugt1a10	UDP glucuronosyltransferase 1 family, polypeptide A7C
19812	Dhcr7	0.526436	13360	NM_007856	AA409147	7-dehydrocholesterol reductase
10360	Ermp1	0.526331	226090	NM_001081213	D19Ertd410e| D19Wsu12e| Fxna| mKIAA1815	endoplasmic reticulum metallopeptidase 1
17690	Mrps35	0.526025	232536	NM_145573	MDSO23| MRP-S28| MRPS28	mitochondrial ribosomal protein S35
415	Abcb6	0.52566	74104	NM_023732	1200005B17Rik	ATP-binding cassette, sub-family B (MDR/TAP), member 6
8725	Psmb8	0.525535	16913	NM_010724	Lmp-7| Lmp7	proteasome (prosome, macropain) subunit, beta type 8 (large multifunctional peptidase 7)
9927	Ndufv1	0.525519	17995	NM_133666	CI-51kD	NADH dehydrogenase (ubiquinone) flavoprotein 1
17708	Mettl20	0.52511	320204	NM_001252095	4833442J19Rik| AI256744| ETFB-KMT	methyltransferase like 20
232	Mfsd6	0.524329	98682	NM_133829	2210010L05Rik| 9630025I22Rik| AI836200| AW212394| MMR2	major facilitator superfamily domain containing 6
1020	Nuf2	0.524121	66977	NM_023284	2410003C07Rik| AU044112| C85691| Cdca1| NUF2R	NUF2, NDC80 kinetochore complex component
13764	Decr1	0.522812	67460	NM_026172	1200012F07Rik| Decr| Nadph	2,4-dienoyl CoA reductase 1, mitochondrial
11793	Ivd	0.522772	56357	NM_019826	1300016K07Rik| 6720455E18Rik| AI463340	isovaleryl coenzyme A dehydrogenase
21345	Gramd1b	0.522482	235283	NM_172768	3222402H23| A930008A22Rik| AI593249| mKIAA1201	GRAM domain containing 1B
1109	Aim2	0.522432	383619	NM_001013779	Gm1313| Ifi210	absent in melanoma 2
7787	Tfrc	0.522326	22042	NM_011638	2610028K12Rik| CD71| E430033M20Rik| Mtvr1| p90| TFR| TFR1| TR| Trfr	transferrin receptor
16042	Rad9b	0.522017	231724	NM_144912	A630082N15Rik| BC021784	RAD9 checkpoint clamp component B
19511	Aldoa	0.521971	11674	NM_007438	Aldo-1| Aldo1	aldolase A, fructose-bisphosphate
17753	Rdh13	0.521663	108841	NM_001290411	8430425D21Rik	retinol dehydrogenase 13 (all-trans and 9-cis)
14098	Alad	0.520498	17025	NM_001276446	ALADH| Lv	aminolevulinate, delta-, dehydratase
16835	Hibadh	0.520429	58875	NM_145567	6430402H10Rik| AI265272	3-hydroxyisobutyrate dehydrogenase
280	Fam126b	0.520123	213056	NM_172513	C130065N10Rik| D1Ertd53e| D630010C10	family with sequence similarity 126, member B
1230	Tgfb2	0.519967	21808	NM_009367	BB105277| Tgf-beta2| Tgfb-2	transforming growth factor, beta 2
5049	Hist1h2bh	0.51959	319182	NM_178197	H2b-221	histone cluster 1, H2bh
11321	2700094K13Rik	0.519085	72657	NM_001037279	Selh	RIKEN cDNA 2700094K13 gene
4030	Tmc8	0.518891	217356	NM_001195090	Ever2| EVIN2| mFLJ00400	transmembrane channel-like gene family 8
19817	Ano1	0.518891	101772	NM_178642	Tmem16a	anoctamin 1, calcium activated chloride channel
19683	Fuom	0.518807	69064	NM_001286217	Fucu| Le51	fucose mutarotase
10994	Slc25a25	0.518751	227731	NM_001164357	1110030N17Rik| MCSC| mKIAA1896	solute carrier family 25 (mitochondrial carrier, phosphate carrier), member 25
9347	4833419F23Rik	0.518687	73915	NR_040328		RIKEN cDNA 4833419F23 gene
15086	Fam132a	0.518674	67389	NM_026125	1110035L05Rik| alipolin| C1qdc2| CTRP12	family with sequence similarity 132, member A
23208	Gpm6b	0.518634	14758	NM_023122	AI593561| Gpm6| M6B	glycoprotein m6b
7903	Ccdc80	0.518353	67896	NM_026439	2610001E17Rik| DRO1| Ssg1| Urb	coiled-coil domain containing 80
19913	Grtp1	0.518331	66790	NM_025768	5430401C05Rik| C81211| Tbc1d6	GH regulated TBC protein 1
9535	Dnd1	0.518274	213236	NM_173383	BC034897| RBMS4| Ter	DND microRNA-mediated repression inhibitor 1
4275	Nampt	0.518257	59027	NM_021524	1110035O14Rik| AI314458| AI480535| NAmPRTase| Pbef| Pbef1| Visfatin	nicotinamide phosphoribosyltransferase
19494	Tufm	0.518253	233870	NM_172745	2300002G02Rik| C76308| C76389| EF-TuMT| EFTU	Tu translation elongation factor, mitochondrial
3990	Acox1	0.518213	11430	NM_015729	Acox| AOX| D130055E20Rik| Paox	acyl-Coenzyme A oxidase 1, palmitoyl
5918	Lrtm1	0.518135	319476	NM_176920	A930016D02Rik	leucine-rich repeats and transmembrane domains 1
16576	Fam71f1	0.517824	330277	NM_207258	GARI-L1| Gm764| NYD-SP18	family with sequence similarity 71, member F1
19944	Xkr5	0.517687	319581	NM_001113350	5430438H03Rik| XRG5	X-linked Kx blood group related 5
5073	Hist1h4a	0.517676	326619	NM_178192		histone cluster 1, H4a
22309	Was	0.517604	22376	NM_009515	U42471| Wasp	Wiskott-Aldrich syndrome
13983	Galnt12	0.51758	230145	NM_172693	9130206E10| A630062B03Rik	UDP-N-acetyl-alpha-D-galactosamine:polypeptide N-acetylgalactosaminyltransferase 12
3151	Itgae	0.517132	16407	NM_172944	A530055J10| alpha-E1| alpha-M290| aM290| CD103	integrin alpha E, epithelial-associated
3737	Cntnap1	0.516825	53321	NM_016782	AI841080| Caspr| NCP1| Nrxn4| p190| shm	contactin associated protein-like 1
17700	Tmtc1	0.516795	387314	NM_198967	Arg99| BC023818	transmembrane and tetratricopeptide repeat containing 1
7231	Abcd2	0.51676	26874	NM_011994	ABC39| ALDL1| ALDR| ALDRP	ATP-binding cassette, sub-family D (ALD), member 2
13926	Hint2	0.51659	68917	NM_026871	1190005L05Rik	histidine triad nucleotide binding protein 2
14829	Aldh4a1	0.516521	212647	NM_175438	A930035F14Rik| Ahd-1| Ahd1| Aldh4| Aldh5a1| E330022C09| P5cd| P5cdh| P5cdhl| P5cdhs| Ssdh1	aldehyde dehydrogenase 4 family, member A1
19436	Uqcrc2	0.516438	67003	NM_025899	1500004O06Rik	ubiquinol cytochrome c reductase core protein 2
14440	Ccdc24	0.514744	381546	NM_001034876	Gm1028	coiled-coil domain containing 24
13609	Ccbl2	0.514349		NM_173763
3388	Acaca	0.514208	107476	NM_133360	A530025K05Rik| Acac| Acc1| Gm738	acetyl-Coenzyme A carboxylase alpha
21101	Qtrt1	0.513394	60507	NM_021888	2610028E17Rik| Tgt	queuine tRNA-ribosyltransferase 1
19285	Ppfibp2	0.513055	19024	NM_008905	Cclp1	PTPRF interacting protein, binding protein 2 (liprin beta 2)
16084	Pitpnm2	0.512302	19679	NM_011256	mKIAA1457| NIR3| Rdgb2| RDGBA2	phosphatidylinositol transfer protein, membrane-associated 2
317	Ndufs1	0.511864	227197	NM_001160040	5830412M15Rik| 9930026A05Rik	NADH dehydrogenase (ubiquinone) Fe-S protein 1
13389	Slc16a4	0.511577	229699	NM_146136	AW146050| MCT 5	solute carrier family 16 (monocarboxylic acid transporters), member 4
16105	Scarb1	0.511544	20778	NM_016741	AI120173| CD36| Cd36l1| Chohd1| Cla-1| Cla1| D5Ertd460e| Hdlq1| Hlb398| mSR-BI| SR-B1| SR-BI| Srb1| SRBI	scavenger receptor class B, member 1
2769	Uqcrq	0.511475	22272	NM_025352	1100001F06Rik| 1500040F11Rik| 5830407L17Rik| 9.5kDa| AA959903| c1502| QP-C| Qpc| Uqcrb	ubiquinol-cytochrome c reductase, complex III subunit VII
7356	Letmd1	0.511422	68614	NM_134093	1110019O13Rik| AI593524| BB130465| BB235638| HCCR-2| HCCR1| MCC-32| Mccr	LETM1 domain containing 1
5056	Hist1h2bf	0.510917	319180	NM_178195		histone cluster 1, H2bf
9837	Acaa2	0.510688	52538	NM_177470	0610011L04Rik| AI255831| AI265397| D18Ertd240e	acetyl-Coenzyme A acyltransferase 2 (mitochondrial 3-oxoacyl-Coenzyme A thiolase)
7814	Hacd2	0.510368	70757	NM_023587	6330408J20Rik| AI255777| AI481689| Hcad2| Ptplb	3-hydroxyacyl-CoA dehydratase 2
5398	Ctla2b	0.51028	13025	NM_007797	AW545568| Ctla-2b	cytotoxic T lymphocyte-associated protein 2 beta
17159	Ccdc37	0.510077		NM_173775
22472	Ndufa1	0.509979	54405	NM_019443	1810049F12Rik| MWFE	NADH dehydrogenase (ubiquinone) 1 alpha subcomplex, 1
20355	Bst2	0.509907	69550	NM_198095	2310015I10Rik| Bst-2| C87040| CD317| DAMP-1| GREG	bone marrow stromal cell antigen 2
11632	2810002D19Rik	0.50949	66457	NR_027831		RIKEN cDNA 2810002D19 gene
15798	Lrrc8d	0.50897	231549	NM_001122768	2810473G09Rik| 4930525N13Rik| A930019F03| Lrrc5	leucine rich repeat containing 8D
14243	Inadl	0.508747	12695	NM_172696	Cipp| Patj	InaD-like (Drosophila)
7265	Amigo2	0.507948	105827	NM_001164602	AI415330| Ali1| AMIGO-2| AW208913	adhesion molecule with Ig like domain 2
3729	Coasy	0.507514	71743	NM_001305982	1300003G02Rik| Dpck| Ppat| Ukr1	Coenzyme A synthase
4719	Serpina3g	0.507446	20715	NM_009251	2A2| AI119734| spi2| Spi2-1| Spi2/eb.1| Spi2A	serine (or cysteine) peptidase inhibitor, clade A, member 3G
21922	Pccb	0.507286	66904	NM_025835	1300012P06Rik| AI314687| R74805	propionyl Coenzyme A carboxylase, beta polypeptide
16600	Cpa4	0.507165	71791	NM_027926	1110019K20Rik| AV009555	carboxypeptidase A4
14322	Echdc2	0.506349	52430	NM_026728	1300017C12Rik| 2610009M20Rik| D4Ertd765e	enoyl Coenzyme A hydratase domain containing 2
6221	Dhrs4	0.505614	28200	NM_030686	AI043103| AI790593| CR| D14Ucla2| mouNRDR| NDRD| PHCR| PSCD| RRD	dehydrogenase/reductase (SDR family) member 4
18906	Arnt2	0.505501	11864	NM_007488	bHLHe1| Hif-2b| mKIAA0307	aryl hydrocarbon receptor nuclear translocator 2
14488	Zmynd12	0.504972	332934	NM_001014900	AI414736	zinc finger, MYND domain containing 12
20543	Mmp2	0.504804	17390	NM_008610	Clg4a| GelA| MMP-2	matrix metallopeptidase 2
3786	Rundc3a	0.504033	51799	NM_016759	Rap2ip| RPIP-8| Rpip8	RUN domain containing 3A
17981	Hif3a	0.503622	53417	NM_016868	bHLHe17| Ipas| MOP7| NEPAS	hypoxia inducible factor 3, alpha subunit
19512	Fam57b	0.503509	68952	NM_026884	1500016O10Rik| A330104J06Rik| AI413816| AW060769	family with sequence similarity 57, member B
3950	Fdxr	0.503424	14149	NM_007997		ferredoxin reductase
19536	Gm4532	0.503068	100043580	NR_030674	100043580	predicted gene 4532
16194	Styxl1	0.502714	76571	NM_001289554	1700011C14Rik| Dusp24| Mkstyx	serine/threonine/tyrosine interacting-like 1
10358	A930007I19Rik	0.502587	77779	NR_015567		RIKEN cDNA A930007I19 gene
18635	Plekha4	0.501966	69217	NM_148927	2410005C22Rik| C88169| Pepp1	pleckstrin homology domain containing, family A (phosphoinositide binding specific) member 4
8151	Cbr1	0.501819	12408	NM_007620	AW261796| Cbr| CR	carbonyl reductase 1
2280	Atp5b	0.501418	11947	NM_016774		ATP synthase, H+ transporting mitochondrial F1 complex, beta subunit
1503	G630090E17Rik	0.501174		NM_001173500
10773	Pdss1	0.501072	56075	NM_019501	2610203G20Rik| 2700031G06Rik| mDLP1| mSPS1| Tprt| TPT| TPT 1	prenyl (solanesyl) diphosphate synthase, subunit 1
2868	Iba57	0.500953	216792	NM_173785	4930543L23Rik| A230051G13Rik| C1orf69	IBA57 homolog, iron-sulfur cluster assembly
271	Aox1	0.500779	11761	NM_009676	AI196512| AI255253| Ao| Aox-1| Aox-2| Aox2| Moro| Ro	aldehyde oxidase 1
15779	Sparcl1	0.500328	13602	NM_010097	Ecm2| hevin| mast9| Sc1	SPARC-like 1
11576	Ndufs3	0.499909	68349	NM_026688	0610010M09Rik| CI-30kD	NADH dehydrogenase (ubiquinone) Fe-S protein 3
13833	3110043O21Rik	0.499637	73205	NM_001081343	AI840585	RIKEN cDNA 3110043O21 gene
22967	Tnmd	0.498509	64103	NM_022322	1110017I01Rik| Bricd4| ChM1L| TeM	tenomodulin
13836	Aco1	0.49825	11428	NM_007386	Aco-1| Irebp| Irp1	aconitase 1
1216	Marc2	0.497954	67247	NM_133684	2810484M10Rik| mARC1| Mosc2	mitochondrial amidoxime reducing component 2
2576	Acyp2	0.497897	75572	NM_029344	2310004B09Rik	acylphosphatase 2, muscle type
18510	Etfb	0.496809	110826	NR_075104	0610009I16Rik| 2810441H06Rik	electron transferring flavoprotein, beta polypeptide
2676	Irgm1	0.496601	15944	NM_008326	Ifggd3| Ifi1| Iigp3| Iipg3| Irgm| LRG-47	immunity-related GTPase family M member 1
5219	Edn1	0.496568	13614	NM_010104	ET-1| PPET1| preproET	endothelin 1
21967	Poc1a	0.495835	70235	NM_027354	2510040D07Rik| cha| Wdr51a	POC1 centriolar protein A
21121	Epor	0.495752	13857	NM_010149		erythropoietin receptor
1873	Uqcr11	0.495002	66594	NM_025650	0710008D09Rik| AL022707| Uqcr	ubiquinol-cytochrome c reductase, complex III subunit XI
5474	Zfp85os	0.494942	68271	NR_027969	4930441O14Rik	zinc finger protein 85, opposite strand
22593	Gm773	0.494398	331416	NM_001033423		predicted gene 773
3426	Gdpd1	0.494369	66569	NM_025638	2610020H15Rik	glycerophosphodiester phosphodiesterase domain containing 1
10947	Phyhd1	0.494155	227696	NM_001252568		phytanoyl-CoA dioxygenase domain containing 1
4033	Tk1	0.494134	21877	NM_001271729	D530002A18Rik| Tk-1| Tk1a| Tk1b	thymidine kinase 1
571	Ndufa10	0.493869	67273	NM_024197	2900053E13Rik	NADH dehydrogenase (ubiquinone) 1 alpha subcomplex 10
6943	Cyc1	0.493804	66445	NM_025567	2610002H19Rik| AA408921| Cyct1	cytochrome c-1
19834	Pex11g	0.493727	69129	NM_026951	1810022F11Rik| 1810049N02Rik| Pex11c| Pex11gamma	peroxisomal biogenesis factor 11 gamma
9957	Lrfn4	0.493522	225875	NM_153388	BC023156| Salm3	leucine rich repeat and fibronectin type III domain containing 4
14749	Nipal3	0.49339	74552	NM_028995	9130020G22Rik| AI480660| Npal3	NIPA-like domain containing 3
4982	Hist1h2ak	0.492765	319169	NM_178183		histone cluster 1, H2ak
17503	Clec9a	0.492622	232414	NM_001205365	9830005G06Rik| DNGR-1	C-type lectin domain family 9, member a
20807	Mlycd	0.491679	56690	NM_019966	AI324784| Mcd	malonyl-CoA decarboxylase
8711	H2-K1	0.490719	14972	NM_001001892	H-2K| H-2K(d)| H2-K| K-f	histocompatibility 2, K1, K region
10396	Ifit3	0.490488	15959	NM_010501	Ifi49| P49	interferon-induced protein with tetratricopeptide repeats 3
3353	Slfn8	0.490416	276950	NM_001167743		schlafen 8
16056	A930024E05Rik	0.488914	109202	NR_045820		RIKEN cDNA A930024E05 gene
10630	Gfra1	0.487717	14585	NR_104342	AU042498	glial cell line derived neurotrophic factor family receptor alpha 1
12923	Gm17359	0.487497	100233207	NM_001142953		predicted gene, 17359
22769	Gyk	0.487278		NM_212444
2573	4931440F15Rik	0.486993	216622	NM_176829	Fem1ab	RIKEN cDNA 4931440F15 gene
4055	Tbc1d16	0.486575	207592	NM_172443	B930087K01| BC026530| Tcd1d16	TBC1 domain family, member 16
1884	Mknk2	0.486444	17347	NM_021462	2010016G11Rik| Gprk7| Mnk2	MAP kinase-interacting serine/threonine kinase 2
964	Fmo2	0.486343	55990	NM_018881	2310008D08Rik| 2310042I22Rik| AW107733	flavin containing monooxygenase 2
16270	6330418K02Rik	0.485543	69004	NR_045821		RIKEN cDNA 6330418K02 gene
1638	Tysnd1	0.481821	71767	NM_027912	1300019N10Rik	trypsin domain containing 1
5060	Hist1h2be	0.481547	319179	NM_178194		histone cluster 1, H2be
10501	Cutc	0.481392	66388	NM_001113562	2310039I18Rik| AI326282| CGI-32	cutC copper transporter
6932	Eppk1	0.48127	223650	NM_144848	6230424I18Rik| EPIPL| EPIPL1| EPPK	epiplakin 1
16628	Tmem140	0.481054	68487	NM_197986	1110007F12Rik	transmembrane protein 140
14321	Scp2	0.480778	20280	NM_011327	AA409774| AA409893| C76618| C79031| ns-LTP| NSL-TP| SCP-2| SCP-X| SCPX	sterol carrier protein 2, liver
2006	Chpt1	0.480247	212862	NR_027477		choline phosphotransferase 1
16051	P2rx4	0.48009	18438	NM_011026	AI504491| AW555605| D5Ertd444e| P2X4	purinergic receptor P2X, ligand-gated ion channel 4
18469	1600014C10Rik	0.479576	72244	NM_001085385	AI428873	RIKEN cDNA 1600014C10 gene
11133	Tnfaip6	0.479297	21930	NM_009398	Tnfip6| TSG-6| Tsg6	tumor necrosis factor alpha induced protein 6
2459	Camk2b	0.479087	12323	NM_001174054		calcium/calmodulin-dependent protein kinase II, beta
10735	Slc39a12	0.478442	277468	NM_001012305	AW046938| Gm731	solute carrier family 39 (zinc transporter), member 12
225	Nabp1	0.478399	109019	NM_028696	4930434H03Rik| 4930442A21Rik| 4930488J04Rik| 4933440J18Rik| 5830411E10Rik| AI852561| Nbp1| Obfc2a| Ssb2	nucleic acid binding protein 1
14344	Ttc39a	0.478072	230603	NM_153392	4922503N01Rik	tetratricopeptide repeat domain 39A
20651	Lrrc29	0.478008	234684	NM_177449	A630024J02Rik| FBL9| FBXL9	leucine rich repeat containing 29
6803	Col14a1	0.476725	12818	NM_181277	5730412L22Rik| AW108078	collagen, type XIV, alpha 1
6917	Gsdmd	0.476467	69146	NM_026960	1810036L03Rik| AW558049| DF5L| Dfna5l| Gsdmdc1| M2-4	gasdermin D
11647	Pdhx	0.476335	27402	NM_175094	AI481367| E3bp| Pdx1	pyruvate dehydrogenase complex, component X
22057	Uqcrc1	0.475635	22273	NM_025407	1110032G10Rik	ubiquinol-cytochrome c reductase core protein 1
994	Mpc2	0.475241	70456	NM_027430	0610006C01Rik| 2010002I07Rik| 2610205H19Rik| AA108335| Brp44| ESTM43	mitochondrial pyruvate carrier 2
19668	Lrrc27	0.475178	76612	NM_027164	1700071K18Rik| 2310044E02Rik	leucine rich repeat containing 27
5057	Hist1h2ad	0.475138	319165	NM_178188		histone cluster 1, H2ad
7175	Ppara	0.474792	19013	NM_001113418	4933429D07Rik| AW742785| Nr1c1| Ppar| PPAR-alpha| PPARalpha	peroxisome proliferator activated receptor alpha
22655	Gm1141	0.474792	382221	NR_027801	Pasd1| RP23-233O1.1	predicted gene 1141
11330	Timm10	0.474628	30059	NM_013899	Tim13| Timm13a	translocase of inner mitochondrial membrane 10
350	Acadl	0.474616	11363	NM_007381	AA960361| AU018452| C79855| LCAD	acyl-Coenzyme A dehydrogenase, long-chain
7601	Ydjc	0.473885	69101	NM_026940	1810015A11Rik| 4930521M19Rik	YdjC homolog (bacterial)
523	Ugt1a9	0.473604	394434	NM_201644	mUGTBr/P| UDPGT| UDPGT 1-9| UGT1-09| UGT1.9| Ugt1a12| UGTP4	UDP glucuronosyltransferase 1 family, polypeptide A9
14169	Plin2	0.473503	101055843	NM_007408
12399	Mmp9	0.473185	17395	NM_013599	AW743869| B/MMP9| Clg4b| Gel B| MMP-9| pro-MMP-9	matrix metallopeptidase 9
5226	Mcur1	0.47277	76137	NM_001081059	6230416A05Rik| AU015498| AV136929| AW554392| C88263| Ccdc90a	mitochondrial calcium uniporter regulator 1
17454	Ndufa9	0.47274	66108	NM_025358	1010001N11Rik	NADH dehydrogenase (ubiquinone) 1 alpha subcomplex, 9
627	B230216N24Rik	0.472371	78603	NR_037993		RIKEN cDNA B230216N24 gene
21479	Ppp2r1b	0.471568	73699	NM_001286553	2410091N08Rik| AI790395	protein phosphatase 2, regulatory subunit A, beta
14115	Tnfsf15	0.471514	326623	NM_177371	Tl1| Tl1a| Tnlg1b| Vegi	tumor necrosis factor (ligand) superfamily, member 15
19787	Igf2	0.470393	16002	NM_001122736	AL033362| Igf-2| Igf-II| M6pr| Mpr| Peg2	insulin-like growth factor 2
7364	Cela1	0.470027	109901	NM_033612	1810009A17Rik| 1810062B19Rik| Ela-1| Ela1| PC-TsF	chymotrypsin-like elastase family, member 1
20327	Ifi30	0.469898	65972	NM_023065	GILT| IP30	interferon gamma inducible protein 30
7097	Aco2	0.469508	11429	NM_080633	Aco-2| Aco3| D10Wsu183e	aconitase 2, mitochondrial
21961	Glyctk	0.469371	235582	NM_174846	6230410P16Rik| C430006L12	glycerate kinase
15363	Letm1	0.469319	56384	NM_019694		leucine zipper-EF-hand containing transmembrane protein 1
11284	Osbpl6	0.468601	99031	NM_145525	1110062M20Rik| AI596402| mKIAA4128| ORP-6	oxysterol binding protein-like 6
7811	Mylk	0.468141	107589	NM_139300	9530072E15Rik| A930019C19Rik| AW489456| KRP| Mlck| MLCK108| MLCK210| nmMlck| smMLCK	myosin, light polypeptide kinase
11331	Slc43a1	0.467571	72401	NM_001081349	2610016F07Rik| AA986141| Lat3| PB39| Pov1| R00504	solute carrier family 43, member 1
4087	Mrpl12	0.467088	56282	NM_027204	0610034O11Rik| 1500031N16Rik| MRP-L12| Rpml12	mitochondrial ribosomal protein L12
14398	Rad54l	0.466681	19366	NM_001122958	RAD54	RAD54 like (S. cerevisiae)
6798	Enpp2	0.466484	18606	NM_001285994	ATX| E-NPP 2| lysoPLD| Npps2| PD-Ialpha| Pdnp2	ectonucleotide pyrophosphatase/phosphodiesterase 2
22154	Eomes	0.466409	13813	NM_001164789	C77258| TBR-2| Tbr2	eomesodermin
7683	Fam131a	0.466283	78408	NM_133778	2900046G09Rik	family with sequence similarity 131, member A
15868	Noc4l	0.465806	100608	NM_153570	AI326906	NOC4 like
11195	Scn7a	0.465706	20272	NM_009135	1110034K09Rik| AI642000| NaG| Nav2| Nav2.3| Nax| Scn6a	sodium channel, voltage-gated, type VII, alpha
3487	Tob1	0.465684	22057	NM_009427	Tob| Trob	transducer of ErbB-2.1
22926	2810403D21Rik	0.465594	69964	NR_015493	1810022M18Rik| 4632410B05Rik| AU017716	RIKEN cDNA 2810403D21 gene
6612	Oxct1	0.465393	67041	NM_024188	2610008O03Rik| Oxct| Oxct2a| Scot-s	3-oxoacid CoA transferase 1
5337	Prr7	0.464588	432763	NM_001030296	XM_484263	proline rich 7 (synaptic)
5072	Hist1h4b	0.464171	326620	NM_178193		histone cluster 1, H4b
3969	Mif4gd	0.463596	69674	NM_027162	1110014L05Rik| 2310075G12Rik	MIF4G domain containing
6344	Fdft1	0.463133	14137	NM_010191	SQS| SS	farnesyl diphosphate farnesyl transferase 1
14432	Kif2c	0.462953	73804	NM_001290662	4930402F02Rik| ESTM5| Knsl6| MCAK| X83316	kinesin family member 2C
19781	Lsp1	0.462943	16985	NM_001271509	Lsp-1| p50| pp52| WP34	lymphocyte specific 1
19748	Taldo1	0.462114	21351	NM_011528		transaldolase 1
17403	Lpcat3	0.461291	14792	NM_145130	C3f| Grcc3f| Lpcat| Lpeat| Lplat5| Lpsat| Mboat5| Moact5| Oact5| PTG	lysophosphatidylcholine acyltransferase 3
8406	Paqr4	0.461291	76498	NM_023824	1500004C10Rik	progestin and adipoQ receptor family member IV
17468	Tspan11	0.460625	68498	NM_026743	1110014F12Rik| AU067806	tetraspanin 11
7628	Slc25a1	0.459809	13358	NM_153150	1300019P08Rik| 2610100G11Rik| AI194714| Ctp| Dgsj| Slc20a3	solute carrier family 25 (mitochondrial carrier, citrate transporter), member 1
20917	Arv1	0.459633	68865	NM_026855	1110067L22Rik| AI461928| AW121084	ARV1 homolog, fatty acid homeostasis modulator
16030	Acad10	0.459511	71985	NM_028037	2410021P16Rik	acyl-Coenzyme A dehydrogenase family, member 10
10399	Ifit1bl2	0.459373	112419	NM_053217	2010002M12Rik| AW412491| Ifit1b	interferon induced protein with tetratricopeptide repeats 1B like 2
2825	Igtp	0.458807	16145	NM_018738	AW558444| Irgm3	interferon gamma induced GTPase
771	Fmod	0.458646	14264	NM_021355	AI131919| AU041740| SLRR2E	fibromodulin
15096	Isg15	0.458542	100038882	NM_015783	100038882| G1p2| IGI15| IP17| Irfp| UCRP	ISG15 ubiquitin-like modifier
21743	Wdr72	0.458131	546144	NM_001033500	AW558070| D230040E23	WD repeat domain 72
19284	Olfml1	0.458005	244198	NM_172907	6720478C22| AV321997| BC047207| mONT2| MVAL564| ONT2	olfactomedin-like 1
11977	Idh3b	0.45759	170718	NM_130884	C78231	isocitrate dehydrogenase 3 (NAD+) beta
3567	Lrrc46	0.456875	69297	NM_027026	1700006D24Rik	leucine rich repeat containing 46
3235	Rnmtl1	0.456756	67390	NM_183263	4833420N02Rik| AI255153| HC90	RNA methyltransferase like 1
56	D030040B21Rik	0.456692	329101	NR_037998	D030040B21	RIKEN cDNA D030040B21 gene
14761	Gale	0.455482	74246	NM_178389	2310002A12Rik| AI323962	galactose-4-epimerase, UDP
14986	Slc25a33	0.455138	70556	NM_027460	5730438N18Rik| Pnc1	solute carrier family 25, member 33
8183	Mx2	0.454875	17858	NR_003508	AI528743| Mx-2	MX dynamin-like GTPase 2
10740	Plxdc2	0.454167	67448	NM_026162	1200007L24Rik| 5430431D22Rik| AI646728| AU022916| AV231634| Tem7r	plexin domain containing 2
18632	Tulp2	0.453408	56734	NM_001290996	Pdet	tubby-like protein 2
6993	Apol9b	0.4517	71898	NM_173743	2310016F22Rik	apolipoprotein L 9b
3411	Tbx2	0.451011	21385	NM_009324		T-box 2
20368	Zfp709	0.451001	236193	NM_145624	BC021921| GIOT-4| HIT-40	zinc finger protein 709
13606	Gbp3	0.450963	55932	NM_001289492	AW228655| GBP-3| GBP-4| Gbp4	guanylate binding protein 3
10397	Ifit1bl1	0.450705	667373	NM_001101605	Gm14446| Ifit1c| OTTMUSG00000016644	interferon induced protein with tetratricpeptide repeats 1B like 1
17008	Hk2	0.450295	15277	NM_013820	AI642394| HKII	hexokinase 2
5761	Hmgcs1	0.448461	208715	NM_145942	B130032C06Rik	3-hydroxy-3-methylglutaryl-Coenzyme A synthase 1
10622	Afap1l2	0.448291	226250	NM_146102	AU041783| C86904| mKIAA1914	actin filament associated protein 1-like 2
1276	Irf6	0.448273	54139	NM_016851	AI876454| E230028I05Rik| mirf6	interferon regulatory factor 6
8236	4930506C21Rik	0.44748	75060	NR_073374		RIKEN cDNA 4930506C21 gene
16781	Gimap6	0.447106	231931	NM_153175	4833419H03Rik| Ian6| mFLJ00102	GTPase, IMAP family member 6
20547	Ces1a	0.446384	244595	NM_001013764	Ces1l| EG244595| Gm4976	carboxylesterase 1A
228	Stat1	0.445873	20846	NM_001205314	2010005J02Rik| AA408197	signal transducer and activator of transcription 1
12336	Fitm2	0.445605	228859	NM_173397	AI414861| D930001I22Rik| Fit2	fat storage-inducing transmembrane protein 2
19360	Mrvi1	0.445506	17540	NM_010826	BB115629| Irag| Ris1	MRV integration site 1
23169	Map7d2	0.445159	78283	NM_001081124	1600028E09Rik| 2900002G04Rik| 5330432J06Rik| C030036K04Rik| Mtap7d2	MAP7 domain containing 2
17062	Pradc1	0.444912	73327	NM_001163427	1700040I03Rik| Pap21	protease-associated domain containing 1
6037	Ear2	0.444852	13587	NM_007895	EAR-13| EAR-2| ECP| ECP 2| Raf3| Rnase2	eosinophil-associated, ribonuclease A family, member 2
20795	Gcsh	0.444129	68133	NM_026572	1100001L02Rik| 5730591C18Rik	glycine cleavage system protein H (aminomethyl carrier)
2293	Cs	0.443913	12974	NM_026444	2610511A05Rik| 9030605P22Rik| Ahl4| BB234005| Cis	citrate synthase
8015	Epha3	0.44336	13837	NM_010140	AW492086| Cek4| End3| ETK1| Hek| Hek4| Mek4| Tyro4	Eph receptor A3
5051	Hist1h4f	0.443356	319157	NM_175655		histone cluster 1, H4f
6636	Slc1a3	0.443319	20512	NM_148938	AI504299| B430115D02Rik| Eaat1| GLAST| GLAST-1| GLU-T| GluT-1| Gmt1| MGluT1	solute carrier family 1 (glial high affinity glutamate transporter), member 3
7586	Fgd4	0.442506	224014	NM_139232	9030023J02Rik| 9330209B17Rik| Frabp| ZFYVE6	FYVE, RhoGEF and PH domain containing 4
1679	Egr2	0.442263	13654	NM_010118	Egr-2| Krox-20| Krox20| NGF1-B| Zfp-25| Zfp-6	early growth response 2
14656	Mecr	0.442251	26922	NM_025297	AI195831| Nrbf1	mitochondrial trans-2-enoyl-CoA reductase
13912	Cd72	0.440343	12517	NM_001110320	CD72c| Ly-19| Ly-32| Ly-m19| Lyb-2	CD72 antigen
16195	Mdh2	0.440311	17448	NM_008617	MDH| Mdh-2| Mor-1| Mor1	malate dehydrogenase 2, NAD (mitochondrial)
14317	Cpt2	0.439966	12896	NM_009949	AI323697| CPTII	carnitine palmitoyltransferase 2
22958	Cldn34c1	0.439029	73061	NM_028426	3110007F17Rik	claudin 34C1
20672	Tsnaxip1	0.437966	72236	NM_024445	1700016K08Rik| TXI1	translin-associated factor X (Tsnax) interacting protein 1
15444	Cd38	0.437755	12494	NM_007646	ADPRC 1| Cd38-rs1| I-19	CD38 antigen
17295	9530062K07Rik	0.437148	78739	NR_131013		RIKEN cDNA 9530062K07 gene
20067	Kcnu1	0.437148	16532	NM_008432	Kcnma3| mSlo3| Slo3	potassium channel, subfamily U, member 1
7732	P3h2	0.436861	210530	NM_173379	4832416N06| AW553532| Leprel1| Mlat4	prolyl 3-hydroxylase 2
10929	Coq4	0.435101	227683	NM_178693	A330041N06| D2Ertd97e	coenzyme Q4
11237	Itga6	0.435066	16403	NM_001277970	5033401O05Rik| AI115430| Cd49f| VLA-6	integrin alpha 6
5443	Gm10324	0.434815	628709	NM_001177832	ENSMUSG00000071302	predicted gene 10324
15781	Dmp1	0.434568	13406	NM_016779	AV020965| Dmp| PP	dentin matrix protein 1
15233	Abcb8	0.434354	74610	NM_029020	4833412N02Rik| AA409895	ATP-binding cassette, sub-family B (MDR/TAP), member 8
15827	Mfsd7a	0.434145	243197	NM_172883	4732482E20Rik| Mfsd7	major facilitator superfamily domain containing 7A
16413	Flt1	0.433856	14254	NM_010228	AI323757| Flt-1| sFlt1| VEGFR-1| VEGFR1	FMS-like tyrosine kinase 1
10118	Bscl2	0.433693	14705	NM_001136064	2900097C17Rik| AI046355| Gng3lg	Berardinelli-Seip congenital lipodystrophy 2 (seipin)
4313	Immp2l	0.433627	93757	NM_053122	AI853880| IMP2	IMP2 inner mitochondrial membrane peptidase-like (S. cerevisiae)
21514	Cib2	0.433477	56506	NM_019686	2810434I23Rik| AI449053	calcium and integrin binding family member 2
10391	Acta2	0.433255	11475	NM_007392	0610041G09Rik| a-SMA| Actvs| alphaSMA| SMalphaA	actin, alpha 2, smooth muscle, aorta
8235	Mpc1	0.433045	55951	NM_018819	0610006G08Rik| 3830411I18Rik| Brp44l	mitochondrial pyruvate carrier 1
8271	Acat2	0.433016	110460	NM_009338	AW742799| Tcp-1x| Tcp1-rs1	acetyl-Coenzyme A acetyltransferase 2
10758	Msrb2	0.432463	76467	NM_029619	2310050L06Rik| Mrsb| Msrb| Pilb	methionine sulfoxide reductase B2
3498	Chad	0.431887	12643	NM_007689	SLRR4A	chondroadherin
12847	Igsf10	0.430706	242050	NM_001162884	6530405F15Rik| 9030224D03| AA409708| AA536958| Adlican2| AI414626| CMF608	immunoglobulin superfamily, member 10
2914	Dhrs7b	0.430575	216820	NM_145428	BC003479| C79874| C80074| PexRAP	dehydrogenase/reductase (SDR family) member 7B
6738	Ncald	0.429802	52589	NM_001170867	AI848120| D030020D09Rik| D15Ertd412e	neurocalcin delta
2898	Pemt	0.429562	18618	NM_008819	PEAMT| Pempt| Pempt2| PEMT2	phosphatidylethanolamine N-methyltransferase
14606	Ak2	0.429426	11637	NM_001033966	Ak-2| D4Ertd220e	adenylate kinase 2
19840	Camsap3	0.429041	69697	NM_027171	2310057J16Rik| Kiaa1543| Nezha	calmodulin regulated spectrin-associated protein family, member 3
3197	Cluh	0.428912	74148	NM_001081158	1300001I01Rik| Kiaa0664| mKIAA0664	clustered mitochondria (cluA/CLU1) homolog
20125	5430403N17Rik	0.428425	330737	NR_046181	5430403N17	RIKEN cDNA 5430403N17 gene
9665	Cdo1	0.427736	12583	NM_033037	1300002L19Rik| Cdo| D18Ucla3	cysteine dioxygenase 1, cytosolic
17352	Usp18	0.427303	24110	NM_011909	1110058H21Rik| AW047653| Ubp15| UBP43	ubiquitin specific peptidase 18
12699	Gpr160	0.427201	71862	NM_001134386	1700025D19Rik| GPCR150	G protein-coupled receptor 160
6038	Ear3	0.426923		NM_017388
6039	Ear12	0.426923		NM_001012766
6584	1810041H14Rik	0.426775	78312	NR_130999		RIKEN cDNA 1810041H14 gene
21635	2300009A05Rik	0.426465	69478	NM_027090		RIKEN cDNA 2300009A05 gene
8810	H2-Q10	0.425084	15007	NM_010391	H-2Q10| Q10| Qa10	histocompatibility 2, Q region locus 10
1601	Edar	0.424954	13608	NM_010100	dl| ED1R| ED3| ED5| EDA-A1R| EDA3	ectodysplasin-A receptor
2531	Mdh1	0.424634	17449	NM_008618	B230377B03Rik| D17921| MDH-s| MDHA| Mor-2| Mor2	malate dehydrogenase 1, NAD (soluble)
10716	Il2ra	0.424334	16184	NM_008367	CD25| Il2r| Ly-43	interleukin 2 receptor, alpha chain
22782	Mageb2	0.422794	17146	NM_031171_1	Mage-b2| Mage-rs2| Smage2	melanoma antigen, family B, 2
15098	Perm1	0.422571	74183	NM_172417	2310042D19Rik	PPARGC1 and ESRR induced regulator, muscle 1
19801	Slc22a18	0.421927	18400	NM_008767	AW260131| BWR1A| BWSCR1A| HET| Impt1| ITM| Orctl2| p45-BWR1A| Slc22a1l| TSSC5	solute carrier family 22 (organic cation transporter), member 18
22841	Gdpd2	0.421895	71584	NM_023608	9130017L10Rik| Gde3| Obdpf	glycerophosphodiester phosphodiesterase domain containing 2
11630	Hsd17b12	0.421342	56348	NM_019657	2610510O05Rik| AI172963| KIK-I| Kik1	hydroxysteroid (17-beta) dehydrogenase 12
15834	Slc26a1	0.421037	231583	NM_174870	Sat1	solute carrier family 26 (sulfate transporter), member 1
15395	Sh3tc1	0.420357	231147	NM_194344	4631428G15| BC024909	SH3 domain and tetratricopeptide repeats 1
15794	Gbp6	0.419978	100702	NM_194336	AI595338| Mpa2l	guanylate binding protein 6
2783	Slc22a4	0.419762	30805	NM_019687	Octn1	solute carrier family 22 (organic cation transporter), member 4
10453	Sorbs1	0.419029	20411	NM_178362	2310065E01Rik| 9530001P15Rik| CAP| mKIAA1296| Sh3d5| SH3P12	sorbin and SH3 domain containing 1
15608	Adgrl3	0.418963	319387	NM_198702	5430402I23Rik| CIRL-3| D130075K09Rik| Gm1379| LEC3| Lphn3| mKIAA0768	adhesion G protein-coupled receptor L3
13460	Dbt	0.418445	13171	NM_010022	D3Wsu60e	dihydrolipoamide branched chain transacylase E2
10513	Scd2	0.418155	20250	NM_009128	mir-5114| Mir5114| Scd-2| swty	stearoyl-Coenzyme A desaturase 2
19783	Tnnt3	0.418135	21957	NM_001163670	fTnT	troponin T3, skeletal, fast
4083	Oxld1	0.417634	66431	NM_025560	1810049H13Rik	oxidoreductase like domain containing 1
7169	Fbln1	0.416321	14114	NM_010180		fibulin 1
19477	Kdm8	0.415242	77035	NM_029842	3110005O21Rik| Jmjd5	lysine (K)-specific demethylase 8
529	Dnajb3	0.415163	15504	NM_008299	Hsj3| MSJ-1| Msj1	DnaJ heat shock protein family (Hsp40) member B3
2679	Psme2b	0.415046	621823	NM_001281472	PA28b-p| PA28b2| Psme2-like| Psme2b-ps	protease (prosome, macropain) activator subunit 2B
2483	Igfbp3	0.413199	16009	NM_008343	AI649005| IGFBP-3| IGgfbp3	insulin-like growth factor binding protein 3
5397	4930486L24Rik	0.413001	214639	NM_178098	AW545031	RIKEN cDNA 4930486L24 gene
1546	Rtn4ip1	0.41277	170728	NM_130892	D10Ertd690e| NIMP	reticulon 4 interacting protein 1
22229	Clec3b	0.41269	21922	NM_011606	Tna	C-type lectin domain family 3, member b
20681	Psmb10	0.412499	19171	NM_013640	Mecl-1| Mecl1	proteasome (prosome, macropain) subunit, beta type 10
12656	Cyp7b1	0.412494	13123	NM_007825	AW261589| D3Ertd552e| hct-1	cytochrome P450, family 7, subfamily b, polypeptide 1
22417	Slc6a14	0.412365	56774	NM_020049	1110007A17Rik| 9030613J17Rik| ATB0plus| CATB0plus	solute carrier family 6 (neurotransmitter transporter), member 14
15137	Cyp51	0.410729	13121	NM_020010	AI426508| Cyp51a1| CYPLI| Ldm| P450-14DM| P450LI	cytochrome P450, family 51
20364	Jak3	0.410688	16453	NM_010589	fae| wil	Janus kinase 3
9420	Rnf125	0.410428	67664	NM_026301	4930553F04Rik	ring finger protein 125
19684	Echs1	0.409503	93747	NM_053119	C80529	enoyl Coenzyme A hydratase, short chain, 1, mitochondrial
8831	2310061I04Rik	0.408437	69662	NM_001033630		RIKEN cDNA 2310061I04 gene
3075	Acadvl	0.406765	11370	NM_017366	vlcad	acyl-Coenzyme A dehydrogenase, very long chain
365	Mreg	0.406611	381269	NM_001005423	dsu| Gm974| Wdt2	melanoregulin
4726	Serpina3n	0.406574	20716	NM_009252	Spi2-2| Spi2.2| Spi2/eb.4	serine (or cysteine) peptidase inhibitor, clade A, member 3N
20244	Msmo1	0.405997	66234	NM_025436	1500001G16Rik| C78600| DESP4| ERG25| Sc4mol	methylsterol monoxygenase 1
2618	Pank3	0.405794	211347	NM_145962		pantothenate kinase 3
2110	Acss3	0.40452	380660	NM_001142804	8430416H19Rik| Gm874	acyl-CoA synthetase short-chain family member 3
10400	Ifit1	0.403898	15957	NM_008331	Ifi56| ISG56| P56	interferon-induced protein with tetratricopeptide repeats 1
3876	1810010H24Rik	0.403458	69066	NM_001163473	OTTMUSG00000003581	RIKEN cDNA 1810010H24 gene
14555	Dnali1	0.402988	75563	NM_175223	1700023A09Rik| AW049135	dynein, axonemal, light intermediate polypeptide 1
11643	Fjx1	0.402859	14221	NM_010218		four jointed box 1 (Drosophila)
22328	Ssxb5	0.402591	387586	NM_199319		synovial sarcoma, X member B, breakpoint 5
13868	Cntfr	0.402413	12804	NM_001136056	Cntfralpha	ciliary neurotrophic factor receptor
3233	Dbil5	0.402393	13168	NM_021294	ELP	diazepam binding inhibitor-like 5
10717	Il15ra	0.402036	16169	NM_001271498	AA690181| IL-15RA	interleukin 15 receptor, alpha chain
16771	Atp6v0e2	0.401296	76252	NM_133764	0610006O14Rik| NM9.2	ATPase, H+ transporting, lysosomal V0 subunit E2
1941	BC025920	0.401218	268319	NR_030677		cDNA sequence BC025920
16109	Aacs	0.401152	78894	NM_030210	2210408B16Rik| SUR5	acetoacetyl-CoA synthetase
4037	Tha1	0.401111	71776	NM_027919	1300017K07Rik| GLY1	threonine aldolase 1
21362	Tmem136	0.400684	235300	NM_001034863	AA396355| Gm184	transmembrane protein 136
21895	E330023G01Rik	0.400535	331011	NR_045332	E330023G01	RIKEN cDNA E330023G01 gene
3905	Abca8a	0.400113	217258	NM_153145		ATP-binding cassette, sub-family A (ABC1), member 8a
446	Scg2	0.398209	20254	NM_009129	Chgc| SgII	secretogranin II
17476	Nrip2	0.396096	60345	NM_001162858	AW491344| NIX1	nuclear receptor interacting protein 2
22313	Rbm3os	0.395954	70226	NR_033561	2900002K06Rik	RNA binding motif protein 3, opposite strand
8876	H2-M5	0.395482	240095	NM_001115075	CRW2| D130003B22Rik| H-2M5	histocompatibility 2, M region locus 5
6379	Ephx2	0.39535	13850	NM_001271403	CEH| Eph2| SEH| sEP	epoxide hydrolase 2, cytoplasmic
6033	Ear10	0.395116	93725	NM_053112	Raf2	eosinophil-associated, ribonuclease A family, member 10
19367	Dkk3	0.395075	50781	NM_015814	AW061014| C87148	dickkopf WNT signaling pathway inhibitor 3
16007	Oas2	0.39485	246728	NM_145227	Oasl11	2'-5' oligoadenylate synthetase 2
9728	Smim3	0.39462	106878	NM_134133	2010002N04Rik| AI195350| AW561905| cI-41| Nid67	small integral membrane protein 3
8181	Mx1	0.394248	17857	NR_003520	AI893580| Mx| Mx-1	MX dynamin-like GTPase 1
10951	Fam73b	0.392845	108958	NM_001242407	5730472N09Rik| AA408683| AI790341| C9orf54| R74766	family with sequence similarity 73, member B
15934	Oasl2	0.39238	23962	NM_011854	M1204| Mmu-OASL| Oasl	2'-5' oligoadenylate synthetase-like 2
11779	Gpr176	0.39212	381413	NM_201367	Gm1012	G protein-coupled receptor 176
1455	Echdc1	0.391551	52665	NM_001110195	1700028A24Rik| AI314462| AI930038| D10Ertd667e| MMCD	enoyl Coenzyme A hydratase domain containing 1
8288	Smoc2	0.390999	64074	NM_022315	1700056C05Rik| 5430426J21Rik| Smoc2l	SPARC related modular calcium binding 2
13461	Lrrc39	0.389826	109245	NM_027321	2010005E21Rik| 9430028I06Rik| Myomasp	leucine rich repeat containing 39
18331	Catsperg1	0.389526	320225	NM_001164658	A230107C01Rik| Catsperg	catsper channel auxiliary subunit gamma 1
22459	Slc25a5	0.389373	11740	NM_007451	Ant2	solute carrier family 25 (mitochondrial carrier, adenine nucleotide translocator), member 5
15687	Parm1	0.388847	231440	NM_145562	2210012L08Rik| 9130213B05Rik| W91666	prostate androgen-regulated mucin-like protein 1
10707	Itih2	0.388578	16425	NM_010582	AI747202| Intin2| Itih-2	inter-alpha trypsin inhibitor, heavy chain 2
20913	Agt	0.388573	11606	NM_007428	AI265500| AngI| AngII| Aogen| Serpina8	angiotensinogen (serpin peptidase inhibitor, clade A, member 8)
18573	Zfp473	0.388244	243963	NM_001289839	D030014N22Rik| zfp-100| Znf473	zinc finger protein 473
1639	Aifm2	0.387945	71361	NM_178058	5430437E11Rik| Amid| D730001I10Rik| PRG3	apoptosis-inducing factor, mitochondrion-associated 2
6593	Gm5089	0.385209	328479	NR_033326	6530402A20| C030005G22Rik| EG328479	predicted gene 5089
22665	Nsdhl	0.385031	18194	NM_010941	AI747449| Bpa| H105E3| Str| XAP104	NAD(P) dependent steroid dehydrogenase-like
5133	Uqcrfs1	0.383647	66694	NM_025710	4430402G14Rik| AI875505	ubiquinol-cytochrome c reductase, Rieske iron-sulfur polypeptide 1
17365	Mfap5	0.383631	50530	NM_015776	MAGP-2	microfibrillar associated protein 5
1290	Cr2	0.383489	12902	NM_007758	C3DR| CD21| CD35| Cr-1| Cr-2| Cr1	complement receptor 2
3758	Tmem106a	0.383462	217203	NM_144830	0610008L10Rik| AI043106| BC022145	transmembrane protein 106A
3111	Zfp3	0.3826	193043	NM_177565	AI854635| B230309J24| Fnp-1| Zfp-3	zinc finger protein 3
3851	Taco1	0.382102	70207	NM_027346	2310066I18Rik| Ccdc44	translational activator of mitochondrially encoded cytochrome c oxidase I
2142	Trhde	0.38209	237553	NM_146241	9330155P21Rik	TRH-degrading enzyme
11132	Nmi	0.381383	64685	NM_001141948		N-myc (and STAT) interactor
602	Bok	0.380099	51800	NM_016778	matador| mtd	BCL2-related ovarian killer
15793	Gbp10	0.378186	626578	NM_001039646		guanylate-binding protein 10
12730	Mccc1	0.37766	72039	NM_023644	1810045E08Rik| 2310058B18Rik| Mcca| MCCalpha| R75106	methylcrotonoyl-Coenzyme A carboxylase 1 (alpha)
[truncated: 408 more rows]

## Sheet: Table S4
Table S4. Genes associated with WAKABAYASHI_ADIPOGENESIS_PPARG_RXRA_BOUND_8D and changed 1.5 fold in shikonin treated 3T3-L1 cells.
ID	Gene symbol	Fold change (Shikonin/DMSO)	Entrez ID	transcript_id	Description
1867	Pcsk4	2.92473	18551	NM_008793	proprotein convertase subtilisin/kexin type 4
3923	Cpsf4l	2.53546	52670	NM_026682	cleavage and polyadenylation specific factor 4-like
16024	Tmem116	2.44908	77462	NM_029912	transmembrane protein 116
11157	Upp2	2.06802	76654	NM_001289660	uridine phosphorylase 2
13786	Coq3	0.666055	230027	NM_172687	coenzyme Q3 methyltransferase
15451	Qdpr	0.665632	110391	NM_024236	quinoid dihydropteridine reductase
20108	Ubxn8	0.659993	108159	NM_178648	UBX domain protein 8
14817	Tmco4	0.655391	77056	NM_001305423	transmembrane and coiled-coil domains 4
20745	Il34	0.654334	76527	NM_029646	interleukin 34
3929	Ttyh2	0.65416	117160	NM_053273	tweety family member 2
18908	Fah	0.64857	14085	NM_010176	fumarylacetoacetate hydrolase
14487	Ppcs	0.647187	106564	NM_026494	phosphopantothenoylcysteine synthetase
21670	Spg21	0.643285	27965	NM_138584	spastic paraplegia 21 homolog (human)
17347	Bcl2l13	0.642119	94044	NM_153516	BCL2-like 13 (apoptosis facilitator)
4558	Ptgr2	0.635679	77219	NM_001252626	prostaglandin reductase 2
443	Acsl3	0.635494	74205	NM_028817	acyl-CoA synthetase long-chain family member 3
20660	Hsd11b2	0.631036	15484	NM_008289	hydroxysteroid 11-beta dehydrogenase 2
18980	Gab2	0.629952	14389	NM_010248	growth factor receptor bound protein 2-associated protein 2
12349	Ywhab	0.628456	54401	NM_018753	tyrosine 3-monooxygenase/tryptophan 5-monooxygenase activation protein, beta polypeptide
11857	Ppip5k1	0.623793	327655	NM_178795	diphosphoinositol pentakisphosphate kinase 1
15983	2410131K14Rik	0.621561	76792	NM_001081236	RIKEN cDNA 2410131K14 gene
9169	Nudt12	0.621093	67993	NM_026497	nudix (nucleoside diphosphate linked moiety X)-type motif 12
3723	Stat5a	0.614827	20850	NM_011488	signal transducer and activator of transcription 5A
19757	Cd151	0.612489	12476	NM_001111049	CD151 antigen
12227	Pxmp4	0.602595	59038	NM_021534	peroxisomal membrane protein 4
7108	Srebf2	0.602122	20788	NM_033218	sterol regulatory element binding factor 2
12120	Cst3	0.59932	13010	NM_009976	cystatin C
16616	Chchd3	0.593219	66075	NM_025336	coiled-coil-helix-coiled-coil-helix domain containing 3
2746	N4bp3	0.592025	212706	NM_145974	NEDD4 binding protein 3
11608	Pex16	0.590539	18633	NR_028114	peroxisomal biogenesis factor 16
11574	Mtch2	0.58625	56428	NM_019758	mitochondrial carrier 2
20760	Mlkl	0.582885	74568	NM_029005	mixed lineage kinase domain-like
19037	Ucp2	0.578824	22228	NM_011671	uncoupling protein 2 (mitochondrial, proton carrier)
21531	Etfa	0.578285	110842	NM_145615	electron transferring flavoprotein, alpha polypeptide
4579	Dlst	0.576198	78920	NM_030225	dihydrolipoamide S-succinyltransferase (E2 component of 2-oxo-glutarate complex)
14949	Plod1	0.575978	18822	NM_011122	procollagen-lysine, 2-oxoglutarate 5-dioxygenase 1
18317	Ech1	0.575247	51798	NM_016772	enoyl coenzyme A hydratase 1, peroxisomal
5055	Hist1h2bg	0.565326	319181	NM_178196	histone cluster 1, H2bg
12926	Etfdh	0.562515	66841	NM_025794	electron transferring flavoprotein, dehydrogenase
1513	Ddo	0.562397	70503	NM_027442	D-aspartate oxidase
16987	Suclg1	0.560219	56451	NM_019879	succinate-CoA ligase, GDP-forming, alpha subunit
10142	Fads2	0.559681	56473	NM_019699	fatty acid desaturase 2
18361	Wdr62	0.557863	233064	NM_146186	WD repeat domain 62
8128	Dnajc28	0.55552	246738	NM_138664	DnaJ heat shock protein family (Hsp40) member C28
17623	Mgst1	0.554305	56615	NM_019946	microsomal glutathione S-transferase 1
13057	Flad1	0.552796	319945	NM_177041	flavin adenine dinucleotide synthetase 1
4981	Hist1h4k	0.546652	319160	NM_178211	histone cluster 1, H4k
14565	Stk40	0.542664	74178	NM_028800	serine/threonine kinase 40
15401	Grpel1	0.542496	17713	NM_024478	GrpE-like 1, mitochondrial
3835	Myl4	0.538698	17896	NM_010858	myosin, light polypeptide 4
10985	Uck1	0.537017	22245	NM_011675	uridine-cytidine kinase 1
234	Hibch	0.533241	227095	NM_146108	3-hydroxyisobutyryl-Coenzyme A hydrolase
6487	Dnajc15	0.529931	66148	NM_025384	DnaJ heat shock protein family (Hsp40) member C15
13544	Hadh	0.529747	15107	NM_008212	hydroxyacyl-Coenzyme A dehydrogenase
5504	Mrpl36	0.529548	94066	NM_053163	mitochondrial ribosomal protein L36
15946	Coq5	0.528991	52064	NM_026504	coenzyme Q5 methyltransferase
5305	Sfxn1	0.528161	14057	NM_027324	sideroflexin 1
17329	Adipor2	0.527911	68465	NM_197985	adiponectin receptor 2
16960	Immt	0.526706	76614	NM_029673	inner membrane protein, mitochondrial
14098	Alad	0.520498	17025	NM_001276446	aminolevulinate, delta-, dehydratase
16835	Hibadh	0.520429	58875	NM_145567	3-hydroxyisobutyrate dehydrogenase
10994	Slc25a25	0.518751	227731	NM_001164357	solute carrier family 25 (mitochondrial carrier, phosphate carrier), member 25
7903	Ccdc80	0.518353	67896	NM_026439	coiled-coil domain containing 80
3990	Acox1	0.518213	11430	NM_015729	acyl-Coenzyme A oxidase 1, palmitoyl
7356	Letmd1	0.511422	68614	NM_134093	LETM1 domain containing 1
9837	Acaa2	0.510688	52538	NM_177470	acetyl-Coenzyme A acyltransferase 2 (mitochondrial 3-oxoacyl-Coenzyme A thiolase)
15798	Lrrc8d	0.50897	231549	NM_001122768	leucine rich repeat containing 8D
14488	Zmynd12	0.504972	332934	NM_001014900	zinc finger, MYND domain containing 12
2868	Iba57	0.500953	216792	NM_173785	IBA57 homolog, iron-sulfur cluster assembly
271	Aox1	0.500779	11761	NM_009676	aldehyde oxidase 1
2576	Acyp2	0.497897	75572	NM_029344	acylphosphatase 2, muscle type
18510	Etfb	0.496809	110826	NR_075104	electron transferring flavoprotein, beta polypeptide
19834	Pex11g	0.493727	69129	NM_026951	peroxisomal biogenesis factor 11 gamma
1884	Mknk2	0.486444	17347	NM_021462	MAP kinase-interacting serine/threonine kinase 2
1638	Tysnd1	0.481821	71767	NM_027912	trypsin domain containing 1
6932	Eppk1	0.48127	223650	NM_144848	epiplakin 1
16628	Tmem140	0.481054	68487	NM_197986	transmembrane protein 140
2006	Chpt1	0.480247	212862	NR_027477	choline phosphotransferase 1
350	Acadl	0.474616	11363	NM_007381	acyl-Coenzyme A dehydrogenase, long-chain
7097	Aco2	0.469508	11429	NM_080633	aconitase 2, mitochondrial
7811	Mylk	0.468141	107589	NM_139300	myosin, light polypeptide kinase
19748	Taldo1	0.462114	21351	NM_011528	transaldolase 1
228	Stat1	0.445873	20846	NM_001205314	signal transducer and activator of transcription 1
12336	Fitm2	0.445605	228859	NM_173397	fat storage-inducing transmembrane protein 2
20795	Gcsh	0.444129	68133	NM_026572	glycine cleavage system protein H (aminomethyl carrier)
2293	Cs	0.443913	12974	NM_026444	citrate synthase
15233	Abcb8	0.434354	74610	NM_029020	ATP-binding cassette, sub-family B (MDR/TAP), member 8
10716	Il2ra	0.424334	16184	NM_008367	interleukin 2 receptor, alpha chain
11630	Hsd17b12	0.421342	56348	NM_019657	hydroxysteroid (17-beta) dehydrogenase 12
19684	Echs1	0.409503	93747	NM_053119	enoyl Coenzyme A hydratase, short chain, 1, mitochondrial
3075	Acadvl	0.406765	11370	NM_017366	acyl-Coenzyme A dehydrogenase, very long chain
20244	Msmo1	0.405997	66234	NM_025436	methylsterol monoxygenase 1
2618	Pank3	0.405794	211347	NM_145962	pantothenate kinase 3
10717	Il15ra	0.402036	16169	NM_001271498	interleukin 15 receptor, alpha chain
6379	Ephx2	0.39535	13850	NM_001271403	epoxide hydrolase 2, cytoplasmic
1455	Echdc1	0.391551	52665	NM_001110195	enoyl Coenzyme A hydratase domain containing 1
13461	Lrrc39	0.389826	109245	NM_027321	leucine rich repeat containing 39
1639	Aifm2	0.387945	71361	NM_178058	apoptosis-inducing factor, mitochondrion-associated 2
2718	Ltc4s	0.375727	17001	NM_008521	leukotriene C4 synthase
18841	Pex11a	0.372363	18631	NM_011068	peroxisomal biogenesis factor 11 alpha
23104	Pfkfb1	0.360405	18639	NM_008824	6-phosphofructo-2-kinase/fructose-2,6-biphosphatase 1
21515	Idh3a	0.355697	67834	NM_029573	isocitrate dehydrogenase 3 (NAD+) alpha
6952	Dgat1	0.354289	13350	NM_010046	diacylglycerol O-acyltransferase 1
13677	Acadm	0.343866	11364	NM_007382	acyl-Coenzyme A dehydrogenase, medium chain
16193	Tmem120a	0.330688	215210	NM_172541	transmembrane protein 120A
15317	Slc5a6	0.316861	330064	NM_001177621	solute carrier family 5 (sodium-dependent vitamin transporter), member 6
17651	Ldhb	0.312021	16832	NM_001302765	lactate dehydrogenase B
4565	Aldh6a1	0.304671	104776	NM_134042	aldehyde dehydrogenase family 6, subfamily A1
12001	Siglec1	0.298656	20612	NM_011426	sialic acid binding Ig-like lectin 1, sialoadhesin
15940	Acads	0.290205	11409	NM_007383	acyl-Coenzyme A dehydrogenase, short chain
1868	Reep6	0.282507	70335	NM_001204931	receptor accessory protein 6
3474	Mmd	0.279953	67468	NM_026178	monocyte to macrophage differentiation-associated
10090	Lgals12	0.268	56072	NM_019516	lectin, galactose binding, soluble 12
16536	Tspan12	0.252371	269831	NM_173007	tetraspanin 12
20266	Lpl	0.245755	16956	NM_008509	lipoprotein lipase
17279	Pparg	0.24182	19016	NM_001127330	peroxisome proliferator activated receptor gamma
9956	Pcx	0.221119	18563	NM_001162946	pyruvate carboxylase
3160	Aspa	0.207699	11484	NM_023113	aspartoacylase
13490	Bcar3	0.206196	29815	NM_013867	breast cancer anti-estrogen resistance 3
18638	Bcat2	0.199751	12036	NM_009737	branched chain aminotransferase 2, mitochondrial
6965	Gpt	0.198768	76282	NM_182805	glutamic pyruvic transaminase, soluble
15860	Pxmp2	0.195994	19301	NM_008993	peroxisomal membrane protein 2
6360	Msra	0.189915	110265	NM_001253715	methionine sulfoxide reductase A
3253	Abhd15	0.17376	67477	NM_026185	abhydrolase domain containing 15
4088	Slc25a10	0.149745	27376	NM_013770	solute carrier family 25 (mitochondrial carrier, dicarboxylate transporter), member 10
10089	Pla2g16	0.149209	225845	NM_139269	phospholipase A2, group XVI
2048	Tmcc3	0.145184	319880	NM_172051	transmembrane and coiled coil domains 3
11586	Nr1h3	0.141311	22259	NM_001177730	nuclear receptor subfamily 1, group H, member 3
13093	S100a1	0.138492	20193	NM_011309	S100 calcium binding protein A1
17	Adhfe1	0.136428	76187	NR_027664	alcohol dehydrogenase, iron containing, 1
5997	Sncg	0.125047	20618	NM_011430	synuclein, gamma
19755	Pnpla2	0.111442	66853	NR_028142	patatin-like phospholipase domain containing 2
16773	Rarres2	0.10616	71660	NM_027852	retinoic acid receptor responder (tazarotene induced) 2
19937	Kbtbd11	0.104376	74901	NM_029116	kelch repeat and BTB (POZ) domain containing 11
10875	Agpat2	0.102724	67512	NM_026212	1-acylglycerol-3-phosphate O-acyltransferase 2 (lysophosphatidic acid acyltransferase, beta)
18217	Lipe	0.0936929	16890	NM_010719	lipase, hormone sensitive
12481	Pck1	0.0816205	18534	NM_011044	phosphoenolpyruvate carboxykinase 1, cytosolic
7006	Tst	0.0795703	22117	NM_009437	thiosulfate sulfurtransferase, mitochondrial
2326	Mettl7b	0.0775454	71664	NM_027853	methyltransferase like 7B
9955	2010003K11Rik	0.0654002	69861	NM_027237	RIKEN cDNA 2010003K11 gene
15673	Rassf6	0.0575799	73246	NM_028478	Ras association (RalGDS/AF-6) domain family member 6
17160	Klf15	0.056742	66277	NM_023184	Kruppel-like factor 15
6698	Cmbl	0.0472656	69574	NM_181588	carboxymethylenebutenolidase-like (Pseudomonas)
3367	Gas2l2	0.0349832	237891	NM_001013759	growth arrest-specific 2 like 2
1279	Hsd11b1	0.0300047	15483	NM_001044751	hydroxysteroid 11-beta dehydrogenase 1
12627	Fabp4	0.0224244	11770	NM_024406	fatty acid binding protein 4, adipocyte
3068	Slc2a4	0.0188222	20528	NM_009204	solute carrier family 2 (facilitated glucose transporter), member 4
7718	Adipoq	0.0149606	11450	NM_009605	adiponectin, C1Q and collagen domain containing
15190	Cd36	0.0117529	12491	NM_001159555	CD36 antigen
8112	Mrap	0.0115078	77037	NM_029844	melanocortin 2 receptor accessory protein
10515	Scd1	0.0113263	20249	NM_009127	stearoyl-Coenzyme A desaturase 1
8884	Ubd	0.0101235	24108	NM_023137	ubiquitin D
18840	Plin1	0.00954808	103968	NM_001113471	perilipin 1
17255	Cidec	0.00624875	14311	NM_001301295	cell death-inducing DFFA-like effector c
7339	Gpd1	0.00504377	14555	NM_010271	glycerol-3-phosphate dehydrogenase 1 (soluble)
18985	Thrsp	0.00157289	21835	NM_009381	thyroid hormone responsive

## Sheet: Table S5
Table S5. Genes associated with WAKABAYASHI_ADIPOGENESIS_PPARG_RXRA_BOUND_WITH_H4K20ME1_MARK and changed 1.5 fold in shikonin treated 3T3-L1 cells.
ID	Gene symbol	Fold change (Shikonin/DMSO)	Entrez ID	transcript_id	Aliases	Description
4206	Pqlc3	1.61077	217430	NM_172574	PQ loop repeat containing
15451	Qdpr	0.665632	110391	NM_024236	2610008L04Rik| D5Ertd371e| Dhpr| PKU2	quinoid dihydropteridine reductase
3929	Ttyh2	0.65416	117160	NM_053273	1110001A03Rik	tweety family member 2
17347	Bcl2l13	0.642119	94044	NM_153516	BCL-RAMBO| E430016C20Rik| Mil-1| Mil1	BCL2-like 13 (apoptosis facilitator)
4558	Ptgr2	0.635679	77219	NM_001252626	1810016I24Rik| 9130222H03Rik| 9630002F03Rik| AI838763| B830026H24Rik| PGR-2| PRG-2| Zadh1	prostaglandin reductase 2
443	Acsl3	0.635494	74205	NM_028817	2610510B12Rik| Acs3| C85929| Facl3| Pro2194	acyl-CoA synthetase long-chain family member 3
12227	Pxmp4	0.602595	59038	NM_021534	3010018P03Rik| Pmp24	peroxisomal membrane protein 4
16616	Chchd3	0.593219	66075	NM_025336	0610041L09Rik| 1700039J09Rik| AW558177	coiled-coil-helix-coiled-coil-helix domain containing 3
11574	Mtch2	0.58625	56428	NM_019758	2310034D24Rik| 4930539J07Rik| HSPC032	mitochondrial carrier 2
14949	Plod1	0.575978	18822	NM_011122	2410042F05Rik| AI854890| AV007929| Lh1| Plod	procollagen-lysine, 2-oxoglutarate 5-dioxygenase 1
10142	Fads2	0.559681	56473	NM_019699	2900042M13Rik| Fadsd2	fatty acid desaturase 2
234	Hibch	0.533241	227095	NM_146108	2610509I15Rik| HIBYL-COA-H	3-hydroxyisobutyryl-Coenzyme A hydrolase
13544	Hadh	0.529747	15107	NM_008212	AA409008| AU019341| AW742602| Hadhsc| HCDH| Schad	hydroxyacyl-Coenzyme A dehydrogenase
5305	Sfxn1	0.528161	14057	NM_027324	2810002O05Rik| A930015P12Rik| f	sideroflexin 1
17329	Adipor2	0.527911	68465	NM_197985	1110001I14Rik| ADCR2| AI115388| AW554121| D6Ucla1e| Paqr2	adiponectin receptor 2
16960	Immt	0.526706	76614	NM_029673	1700082C19Rik| D830041H16Rik| HMP| P87| P87/89| P89	inner membrane protein, mitochondrial
14098	Alad	0.520498	17025	NM_001276446	ALADH| Lv	aminolevulinate, delta-, dehydratase
16835	Hibadh	0.520429	58875	NM_145567	6430402H10Rik| AI265272	3-hydroxyisobutyrate dehydrogenase
3990	Acox1	0.518213	11430	NM_015729	Acox| AOX| D130055E20Rik| Paox	acyl-Coenzyme A oxidase 1, palmitoyl
9837	Acaa2	0.510688	52538	NM_177470	0610011L04Rik| AI255831| AI265397| D18Ertd240e	acetyl-Coenzyme A acyltransferase 2 (mitochondrial 3-oxoacyl-Coenzyme A thiolase)
15798	Lrrc8d	0.50897	231549	NM_001122768	2810473G09Rik| 4930525N13Rik| A930019F03| Lrrc5	leucine rich repeat containing 8D
271	Aox1	0.500779	11761	NM_009676	AI196512| AI255253| Ao| Aox-1| Aox-2| Aox2| Moro| Ro	aldehyde oxidase 1
18510	Etfb	0.496809	110826	NR_075104	0610009I16Rik| 2810441H06Rik	electron transferring flavoprotein, beta polypeptide
1884	Mknk2	0.486444	17347	NM_021462	2010016G11Rik| Gprk7| Mnk2	MAP kinase-interacting serine/threonine kinase 2
2006	Chpt1	0.480247	212862	NR_027477		choline phosphotransferase 1
20795	Gcsh	0.444129	68133	NM_026572	1100001L02Rik| 5730591C18Rik	glycine cleavage system protein H (aminomethyl carrier)
2293	Cs	0.443913	12974	NM_026444	2610511A05Rik| 9030605P22Rik| Ahl4| BB234005| Cis	citrate synthase
11630	Hsd17b12	0.421342	56348	NM_019657	2610510O05Rik| AI172963| KIK-I| Kik1	hydroxysteroid (17-beta) dehydrogenase 12
20244	Msmo1	0.405997	66234	NM_025436	1500001G16Rik| C78600| DESP4| ERG25| Sc4mol	methylsterol monoxygenase 1
2618	Pank3	0.405794	211347	NM_145962		pantothenate kinase 3
23104	Pfkfb1	0.360405	18639	NM_008824	PFK/FBPase 1	6-phosphofructo-2-kinase/fructose-2,6-biphosphatase 1
6952	Dgat1	0.354289	13350	NM_010046	ARAT| C75990| D15Ertd23e| Dgat	diacylglycerol O-acyltransferase 1
13677	Acadm	0.343866	11364	NM_007382	AU018656| MCAD	acyl-Coenzyme A dehydrogenase, medium chain
4565	Aldh6a1	0.304671	104776	NM_134042	1110038I05Rik| Mmsdh	aldehyde dehydrogenase family 6, subfamily A1
20266	Lpl	0.245755	16956	NM_008509		lipoprotein lipase
17279	Pparg	0.24182	19016	NM_001127330	Nr1c3| PPAR-gamma| PPAR-gamma2| PPARgamma| PPARgamma2	peroxisome proliferator activated receptor gamma
9956	Pcx	0.221119	18563	NM_001162946	Pc| Pcb	pyruvate carboxylase
13490	Bcar3	0.206196	29815	NM_013867	AI131758| AND-34	breast cancer anti-estrogen resistance 3
18638	Bcat2	0.199751	12036	NM_009737	Bcat-2| Eca40	branched chain aminotransferase 2, mitochondrial
3253	Abhd15	0.17376	67477	NM_026185	1300007F04Rik	abhydrolase domain containing 15
10089	Pla2g16	0.149209	225845	NM_139269	C78643| Hrasls3| Hrev107| HRSL3| MLP-3	phospholipase A2, group XVI
2048	Tmcc3	0.145184	319880	NM_172051	AW488095| C630016B22Rik| C88213| Tmcc1	transmembrane and coiled coil domains 3
19755	Pnpla2	0.111442	66853	NR_028142	0610039C21Rik| 1110001C14Rik| Atgl| TTS-2.2	patatin-like phospholipase domain containing 2
10875	Agpat2	0.102724	67512	NM_026212	2510002J07Rik| AV000834| BSCL| BSCL1| LPAAB| LPAAT-beta	1-acylglycerol-3-phosphate O-acyltransferase 2 (lysophosphatidic acid acyltransferase, beta)
18217	Lipe	0.0936929	16890	NM_010719	4933403G17Rik| HSL	lipase, hormone sensitive
17160	Klf15	0.056742	66277	NM_023184	1810013I09Rik| AV048136| AW494632| CKLF| KKLF	Kruppel-like factor 15
12627	Fabp4	0.0224244	11770	NM_024406	422/aP2| ALBP/Ap2| Ap2| Lbpl	fatty acid binding protein 4, adipocyte
7718	Adipoq	0.0149606	11450	NM_009605	30kDa| Acdc| Acrp30| Ad| adipo| apM1| APN| GBP28	adiponectin, C1Q and collagen domain containing

## Sheet: Table S6
Table S6. Genes associated with WANG_CLASSIC_ADIPOGENIC_TARGETS_OF_PPARG and changed 1.5 fold in shikonin treated 3T3-L1 cells.
ID	Gene symbol	Fold change (Shikonin/DMSO)	Entrez ID	transcript_id	Aliases	Description
13853	Aqp7	0.567474	11832	NM_007473	AQP7L| AQPap	aquaporin 7
17623	Mgst1	0.554305	56615	NM_019946	1500002K10Rik| Gst	microsomal glutathione S-transferase 1
6379	Ephx2	0.39535	13850	NM_001271403	CEH| Eph2| SEH| sEP	epoxide hydrolase 2, cytoplasmic
18841	Pex11a	0.372363	18631	NM_011068	PEX11alpha	peroxisomal biogenesis factor 11 alpha
6952	Dgat1	0.354289	13350	NM_010046	ARAT| C75990| D15Ertd23e| Dgat	diacylglycerol O-acyltransferase 1
10953	Crat	0.329843	12908	NM_007760	AW107812| CARAT	carnitine acetyltransferase
9113	Plin4	0.317437	57435	NM_020568	mKIAA1881| S3-12	perilipin 4
10090	Lgals12	0.268	56072	NM_019516	AW987437| Grip1	lectin, galactose binding, soluble 12
18449	Cebpa	0.216698	12606	NM_001287514	C/ebpalpha| CBF-A| Cebp	CCAAT/enhancer binding protein (C/EBP), alpha
12623	Fabp5	0.2066	16592	NM_010634	E-FABP| Fabpe| Klbp| mal1| PA-FABP	fatty acid binding protein 5, epidermal
894	Glul	0.184891	14645	NM_008131	Glns| GS	glutamate-ammonia ligase (glutamine synthetase)
4088	Slc25a10	0.149745	27376	NM_013770	Dic	solute carrier family 25 (mitochondrial carrier, dicarboxylate transporter), member 10
11586	Nr1h3	0.141311	22259	NM_001177730	AU018371| LXR| RLD1| Unr1	nuclear receptor subfamily 1, group H, member 3
13093	S100a1	0.138492	20193	NM_011309	AI266795| S100| S100a	S100 calcium binding protein A1
17	Adhfe1	0.136428	76187	NR_027664	6330565B14Rik| Adh8| AI043035	alcohol dehydrogenase, iron containing, 1
19755	Pnpla2	0.111442	66853	NR_028142	0610039C21Rik| 1110001C14Rik| Atgl| TTS-2.2	patatin-like phospholipase domain containing 2
9747	Ppargc1b	0.0985703	170826	NM_133249	4631412G21Rik| Perc	peroxisome proliferative activated receptor, gamma, coactivator 1 beta
1279	Hsd11b1	0.0300047	15483	NM_001044751		hydroxysteroid 11-beta dehydrogenase 1
20184	Acsl1	0.02767	14081	NM_007981	Acas| Acas1| Acs| Facl2| FACS| LACS 1| LACS1	acyl-CoA synthetase long-chain family member 1
12627	Fabp4	0.0224244	11770	NM_024406	422/aP2| ALBP/Ap2| Ap2| Lbpl	fatty acid binding protein 4, adipocyte
19845	Retn	0.0164414	57264	NM_022984	ADSF| Fizz3| Rstn| Xcp4	resistin
15190	Cd36	0.0117529	12491	NM_001159555	FAT| GPIV| Scarb3	CD36 antigen
17255	Cidec	0.00624875	14311	NM_001301295	CIDE-3| Fsp27	cell death-inducing DFFA-like effector c
1839	Cfd	0.0007939	11537	NM_013459	Adn| DF	complement factor D (adipsin)
